# Supplementary material
Source: Research Square preprint supplement (doi:10.21203/rs.3.rs-8923464/v1)
Supplement: Supplementary file 1 [file 3741a9f9ebbb061df4c44371.docx]

**Fig. S1** Spatial Trend Analysis of Temperature **S1a** – Spatial trend of annual mean Temperature. **S1b** – Spatial trend of winter temperature **S1c** – Spatial trend of pre-monsoon temperature. **S1d** – Spatial trend of monsoon temperature. **S1e** – Spatial trend of post-monsoon temperature


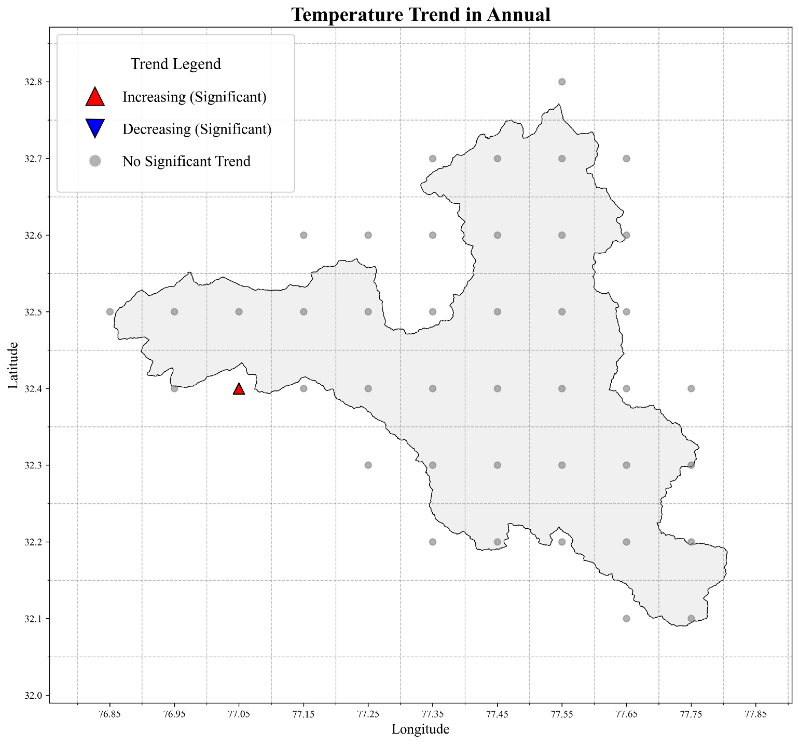

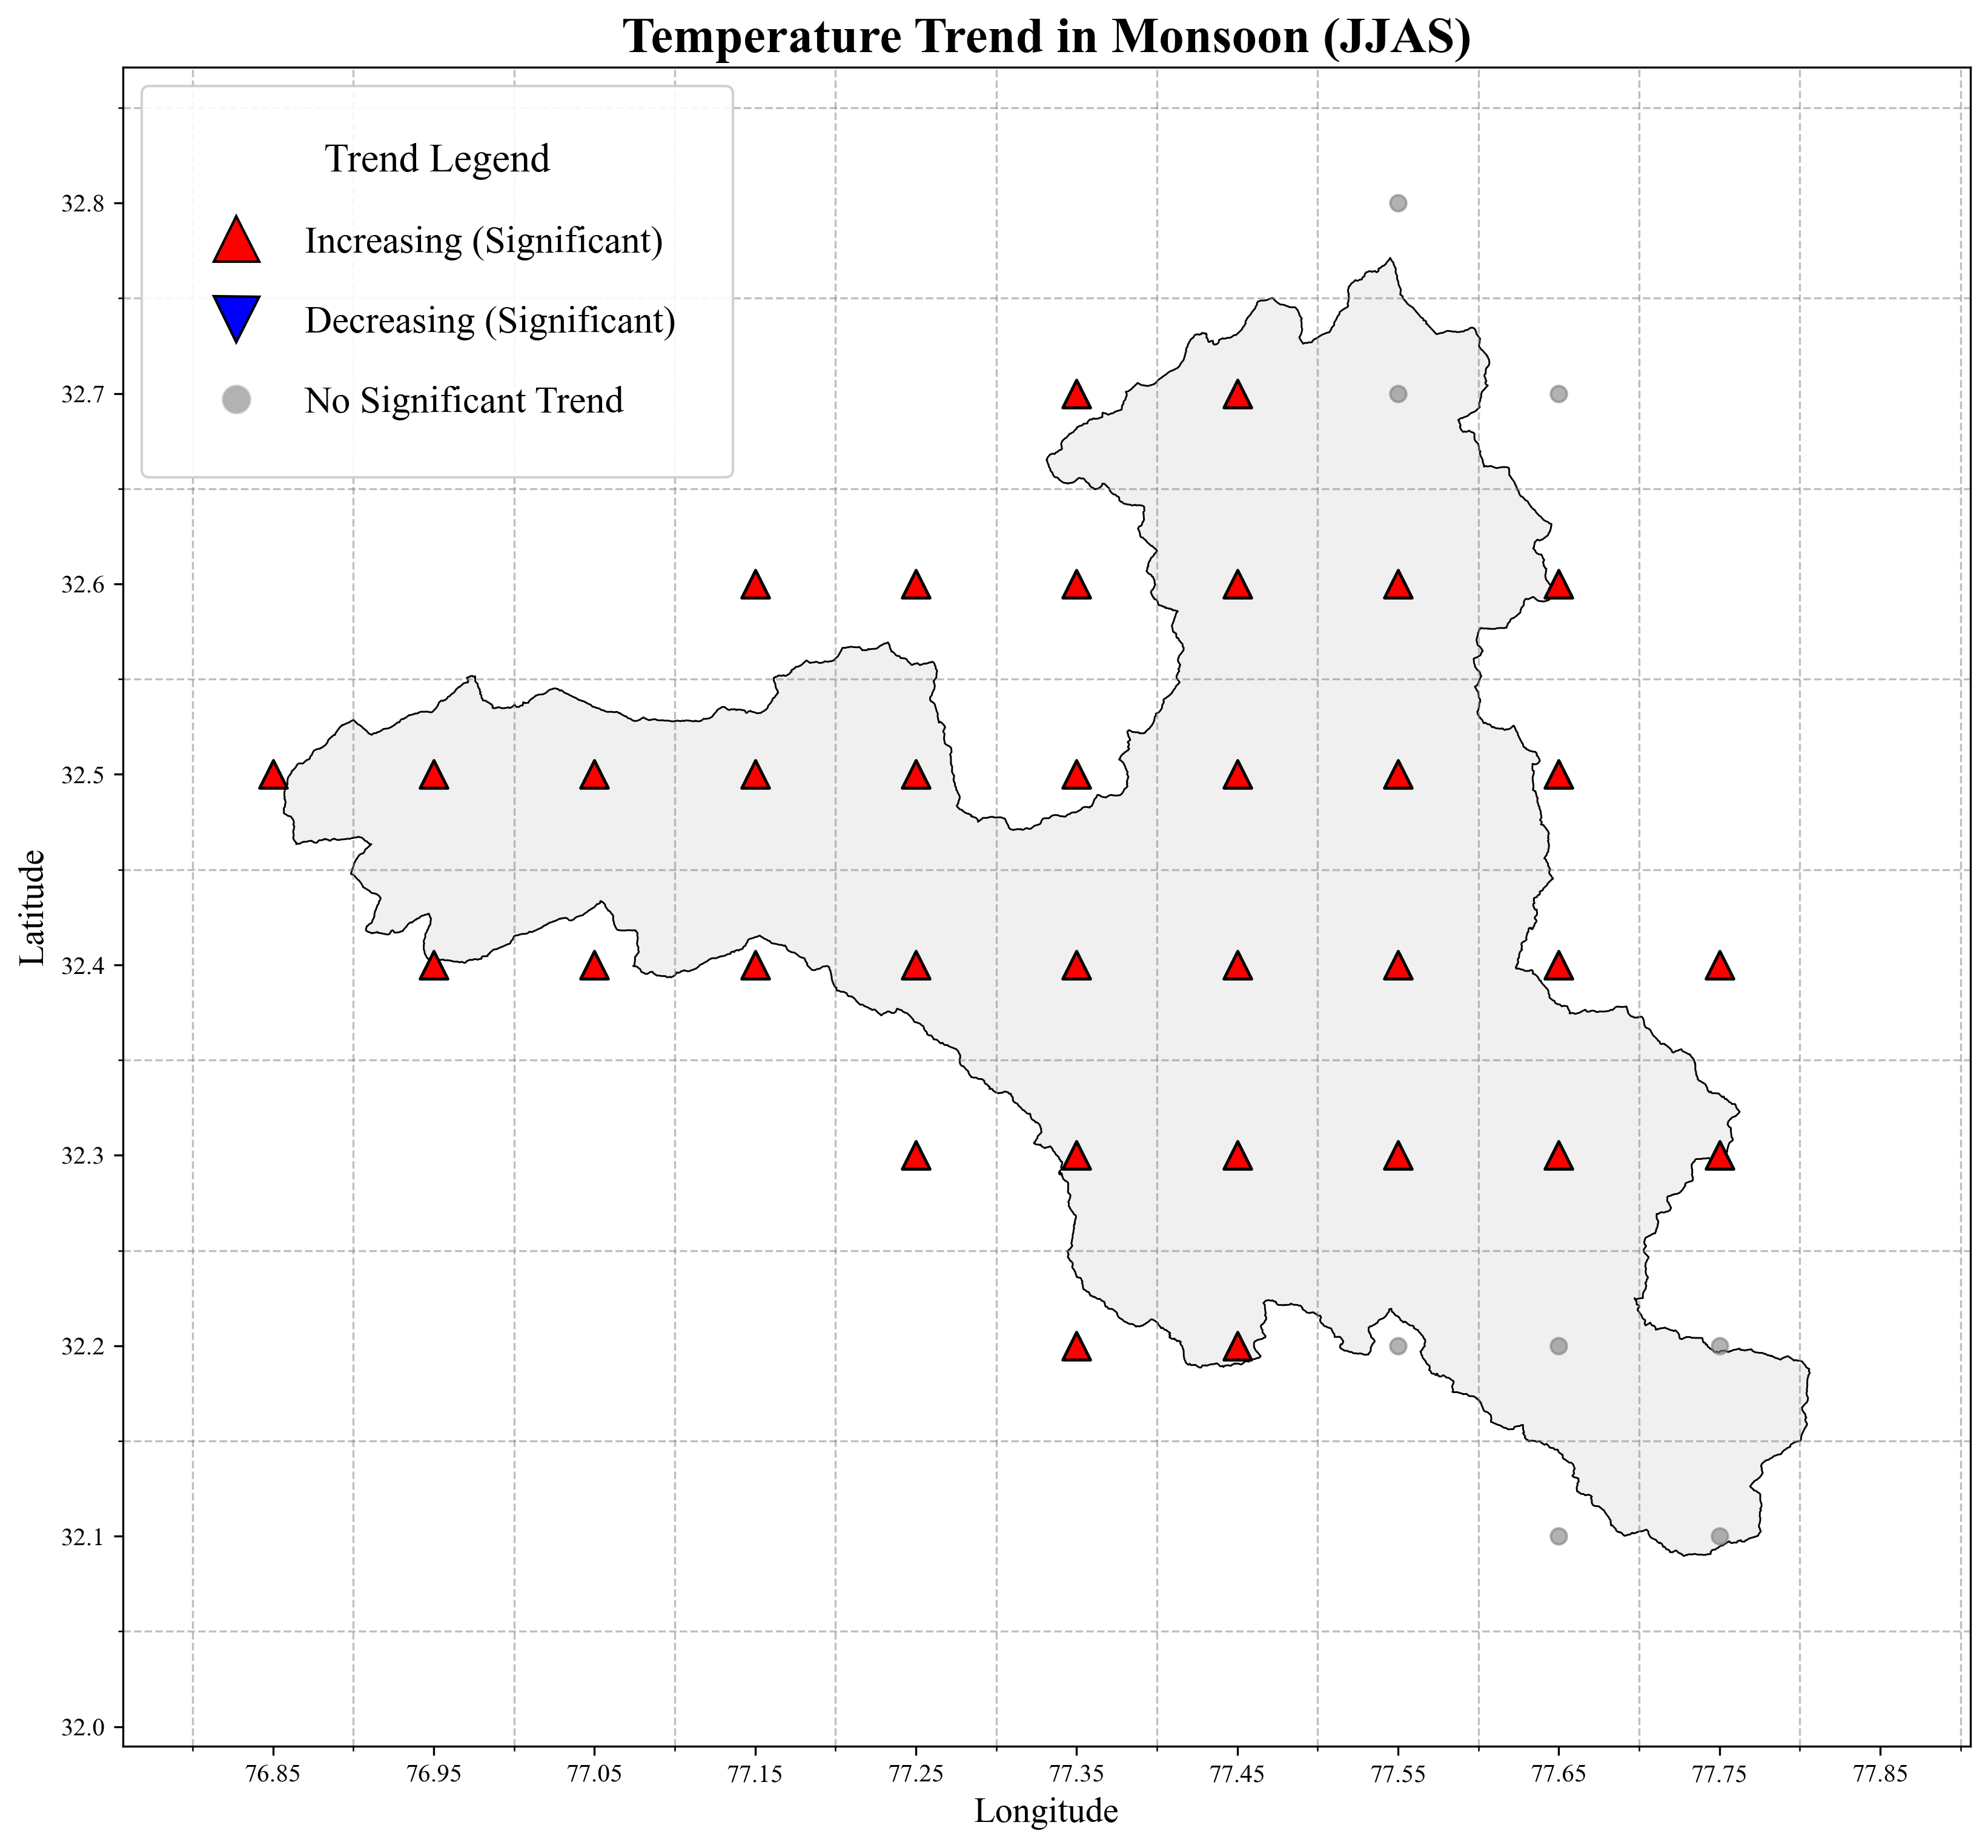

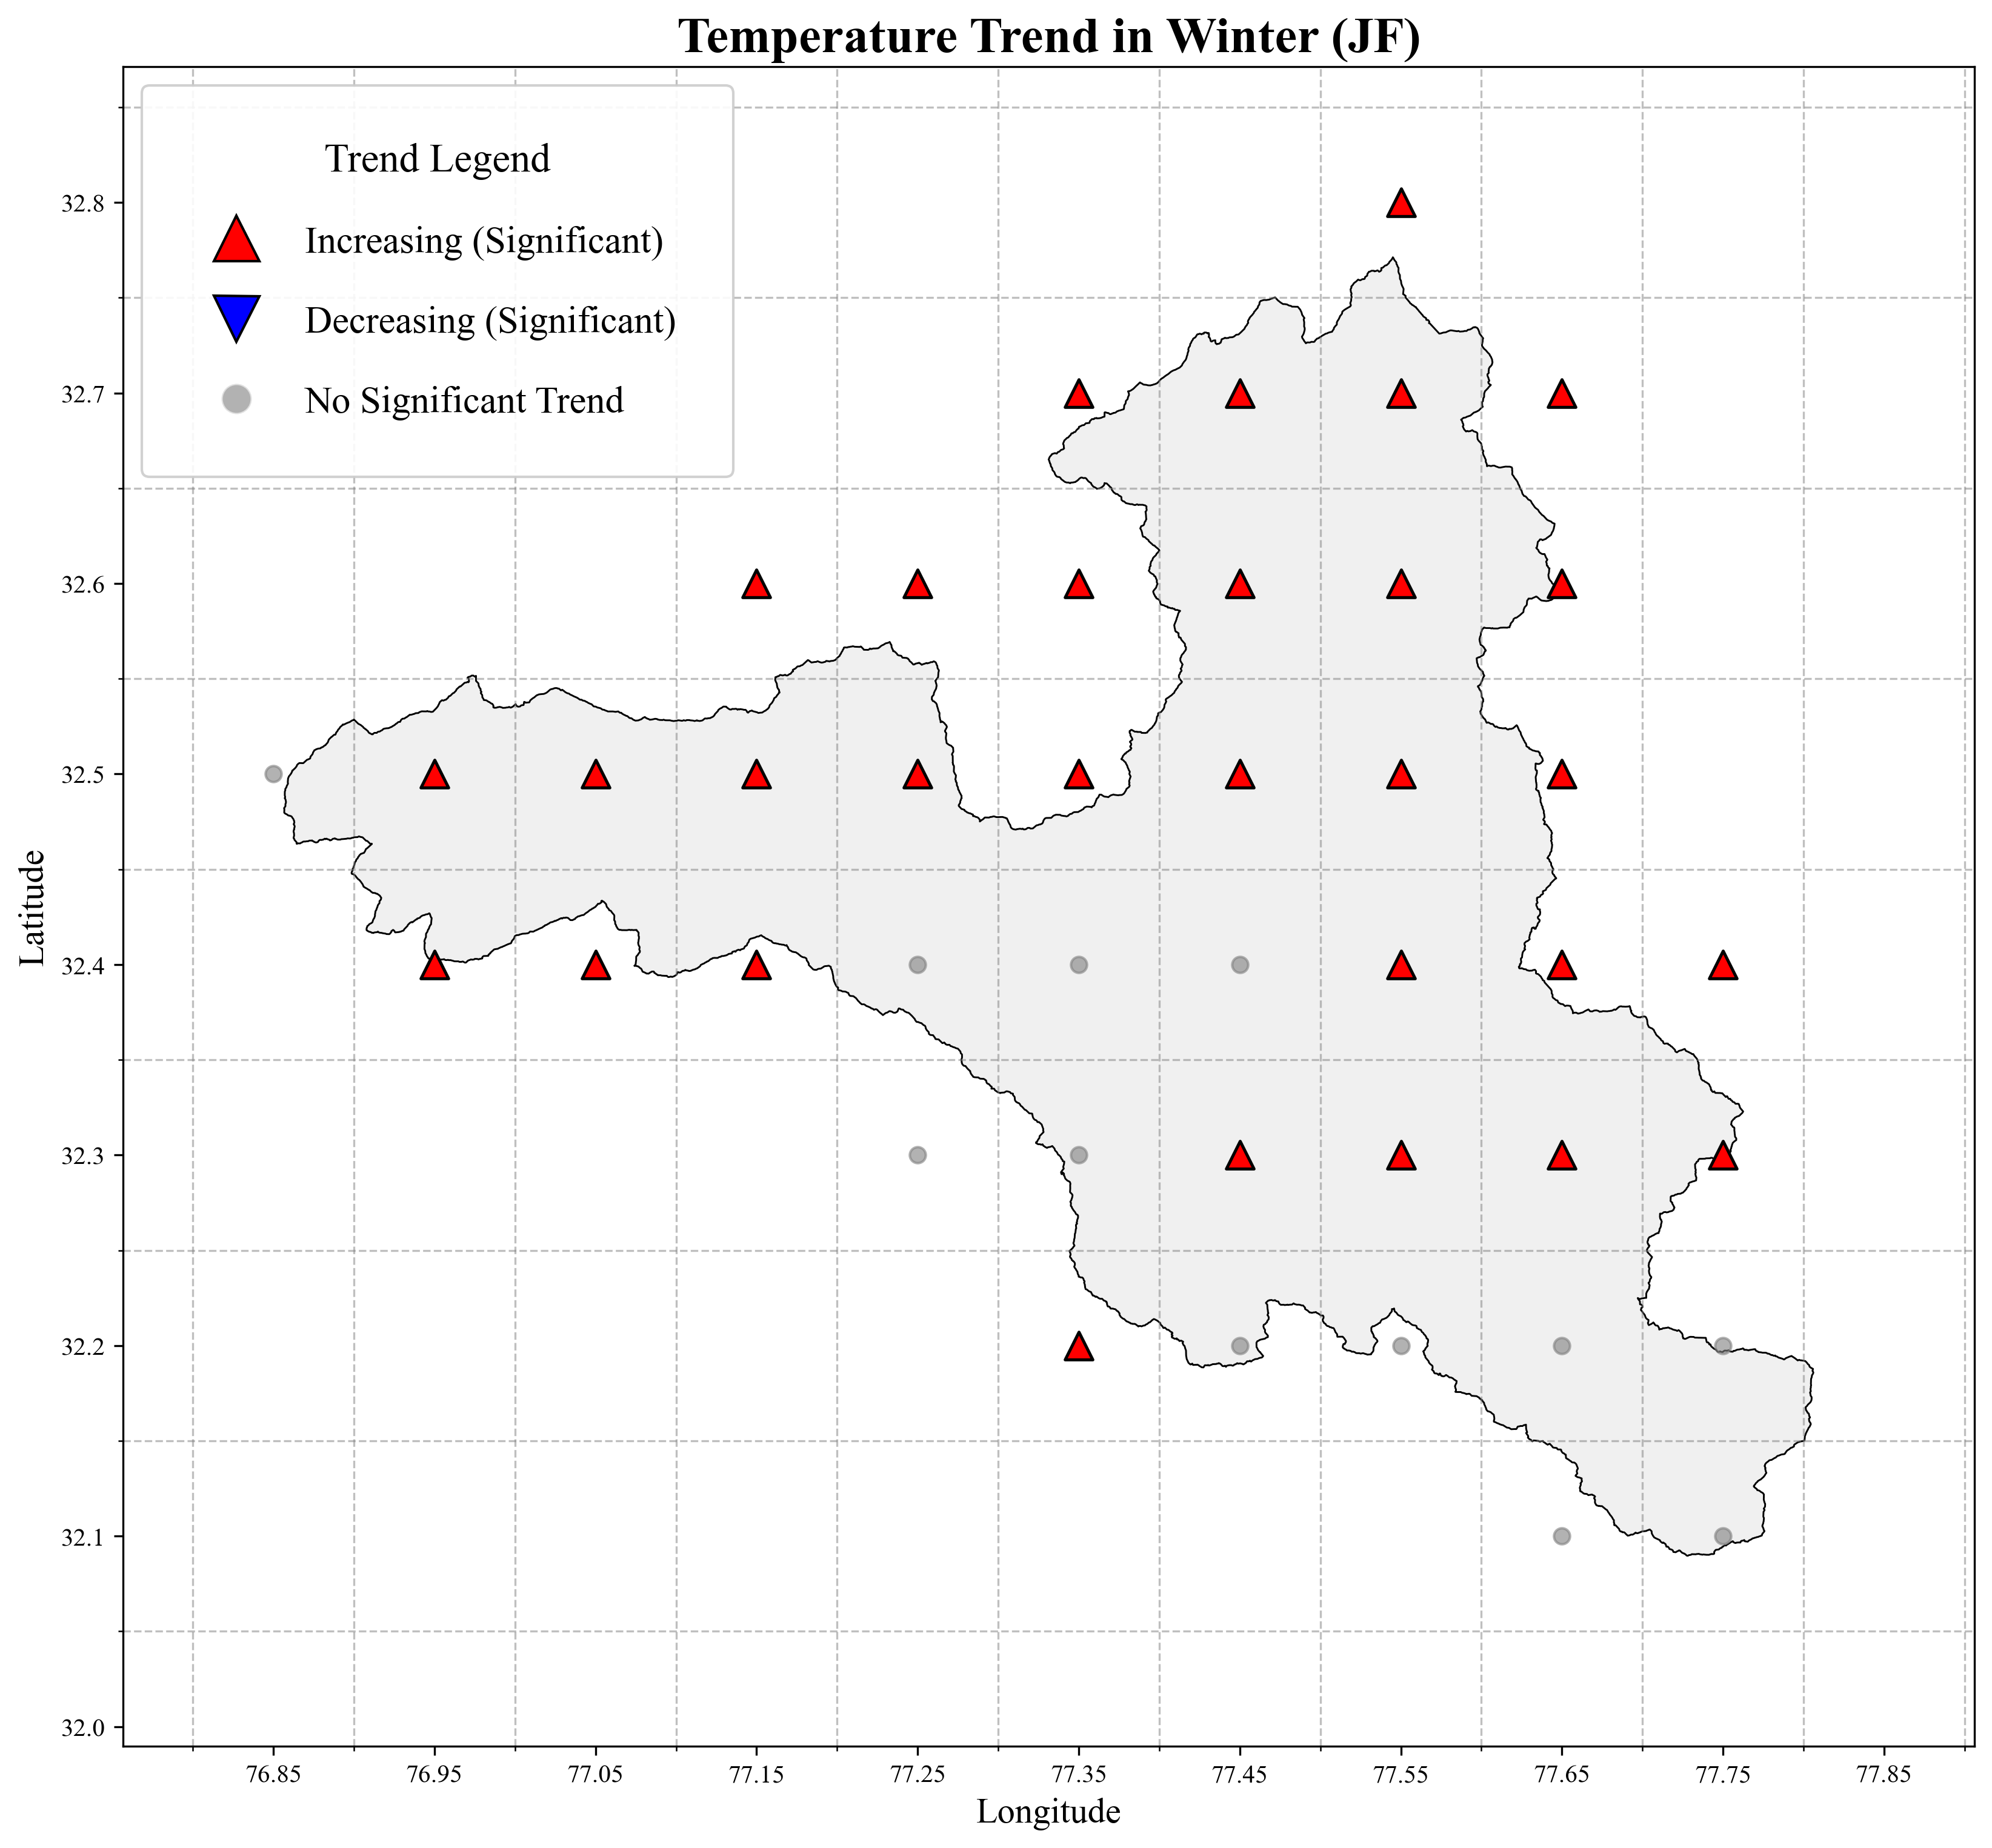

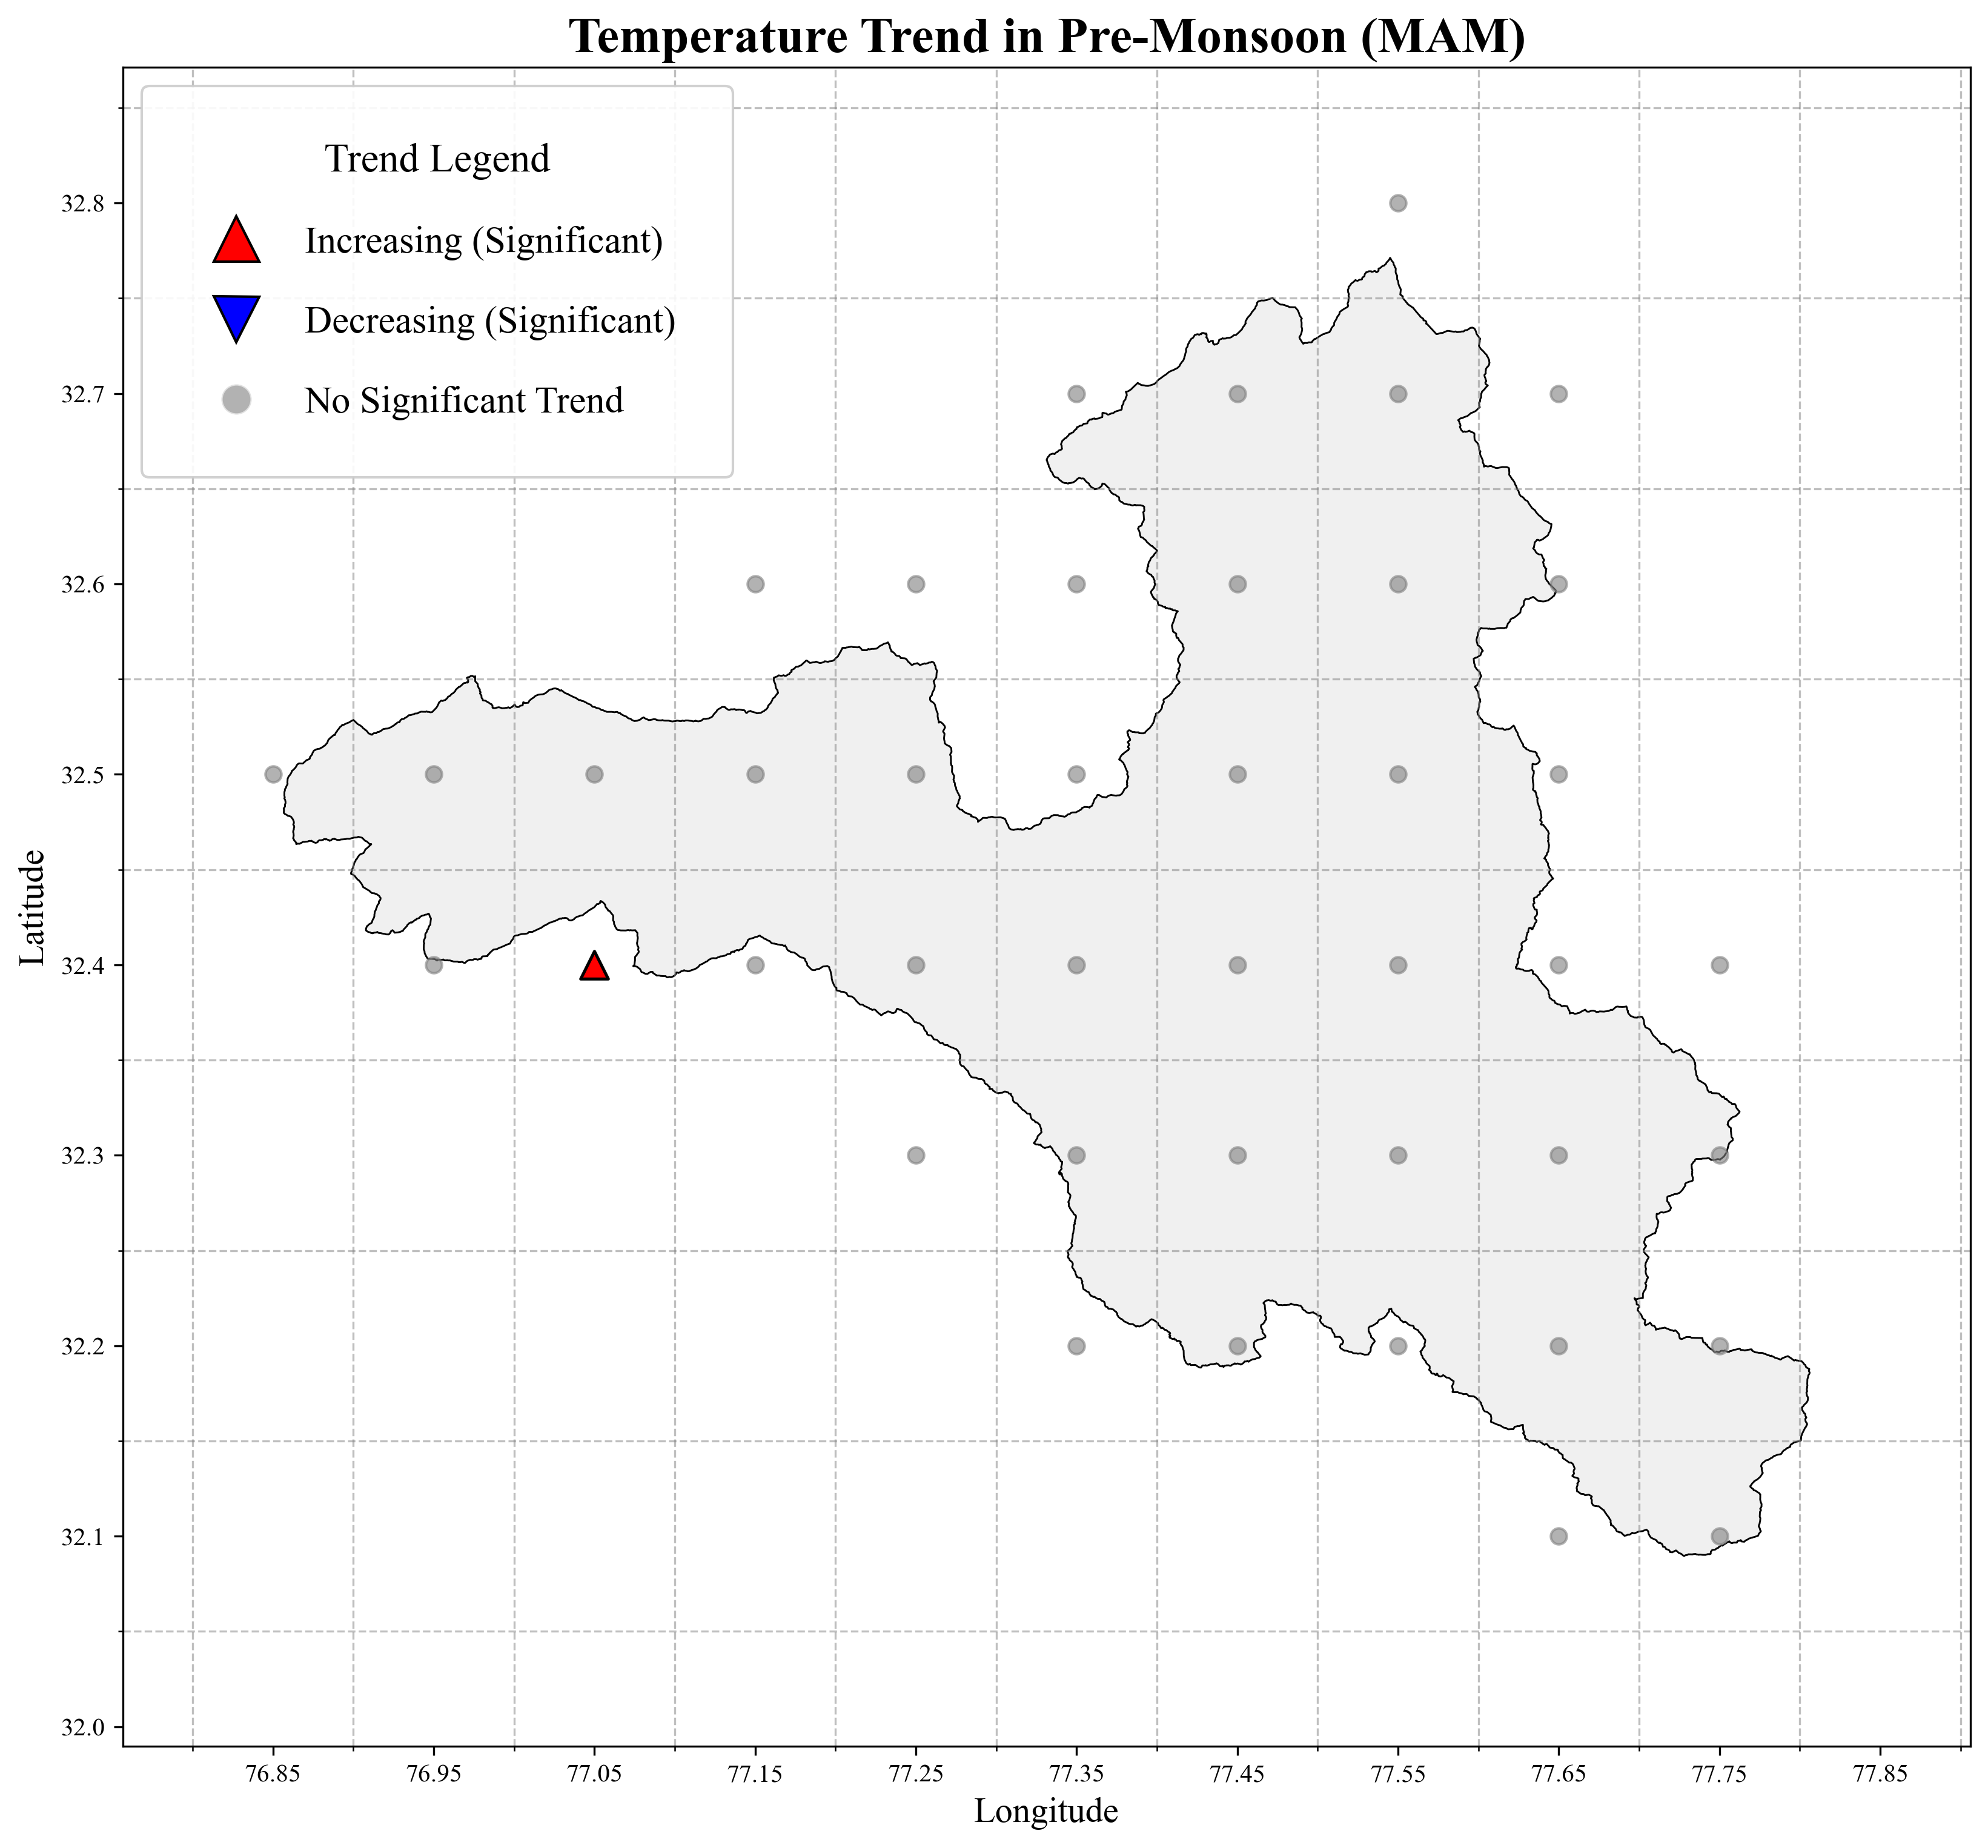

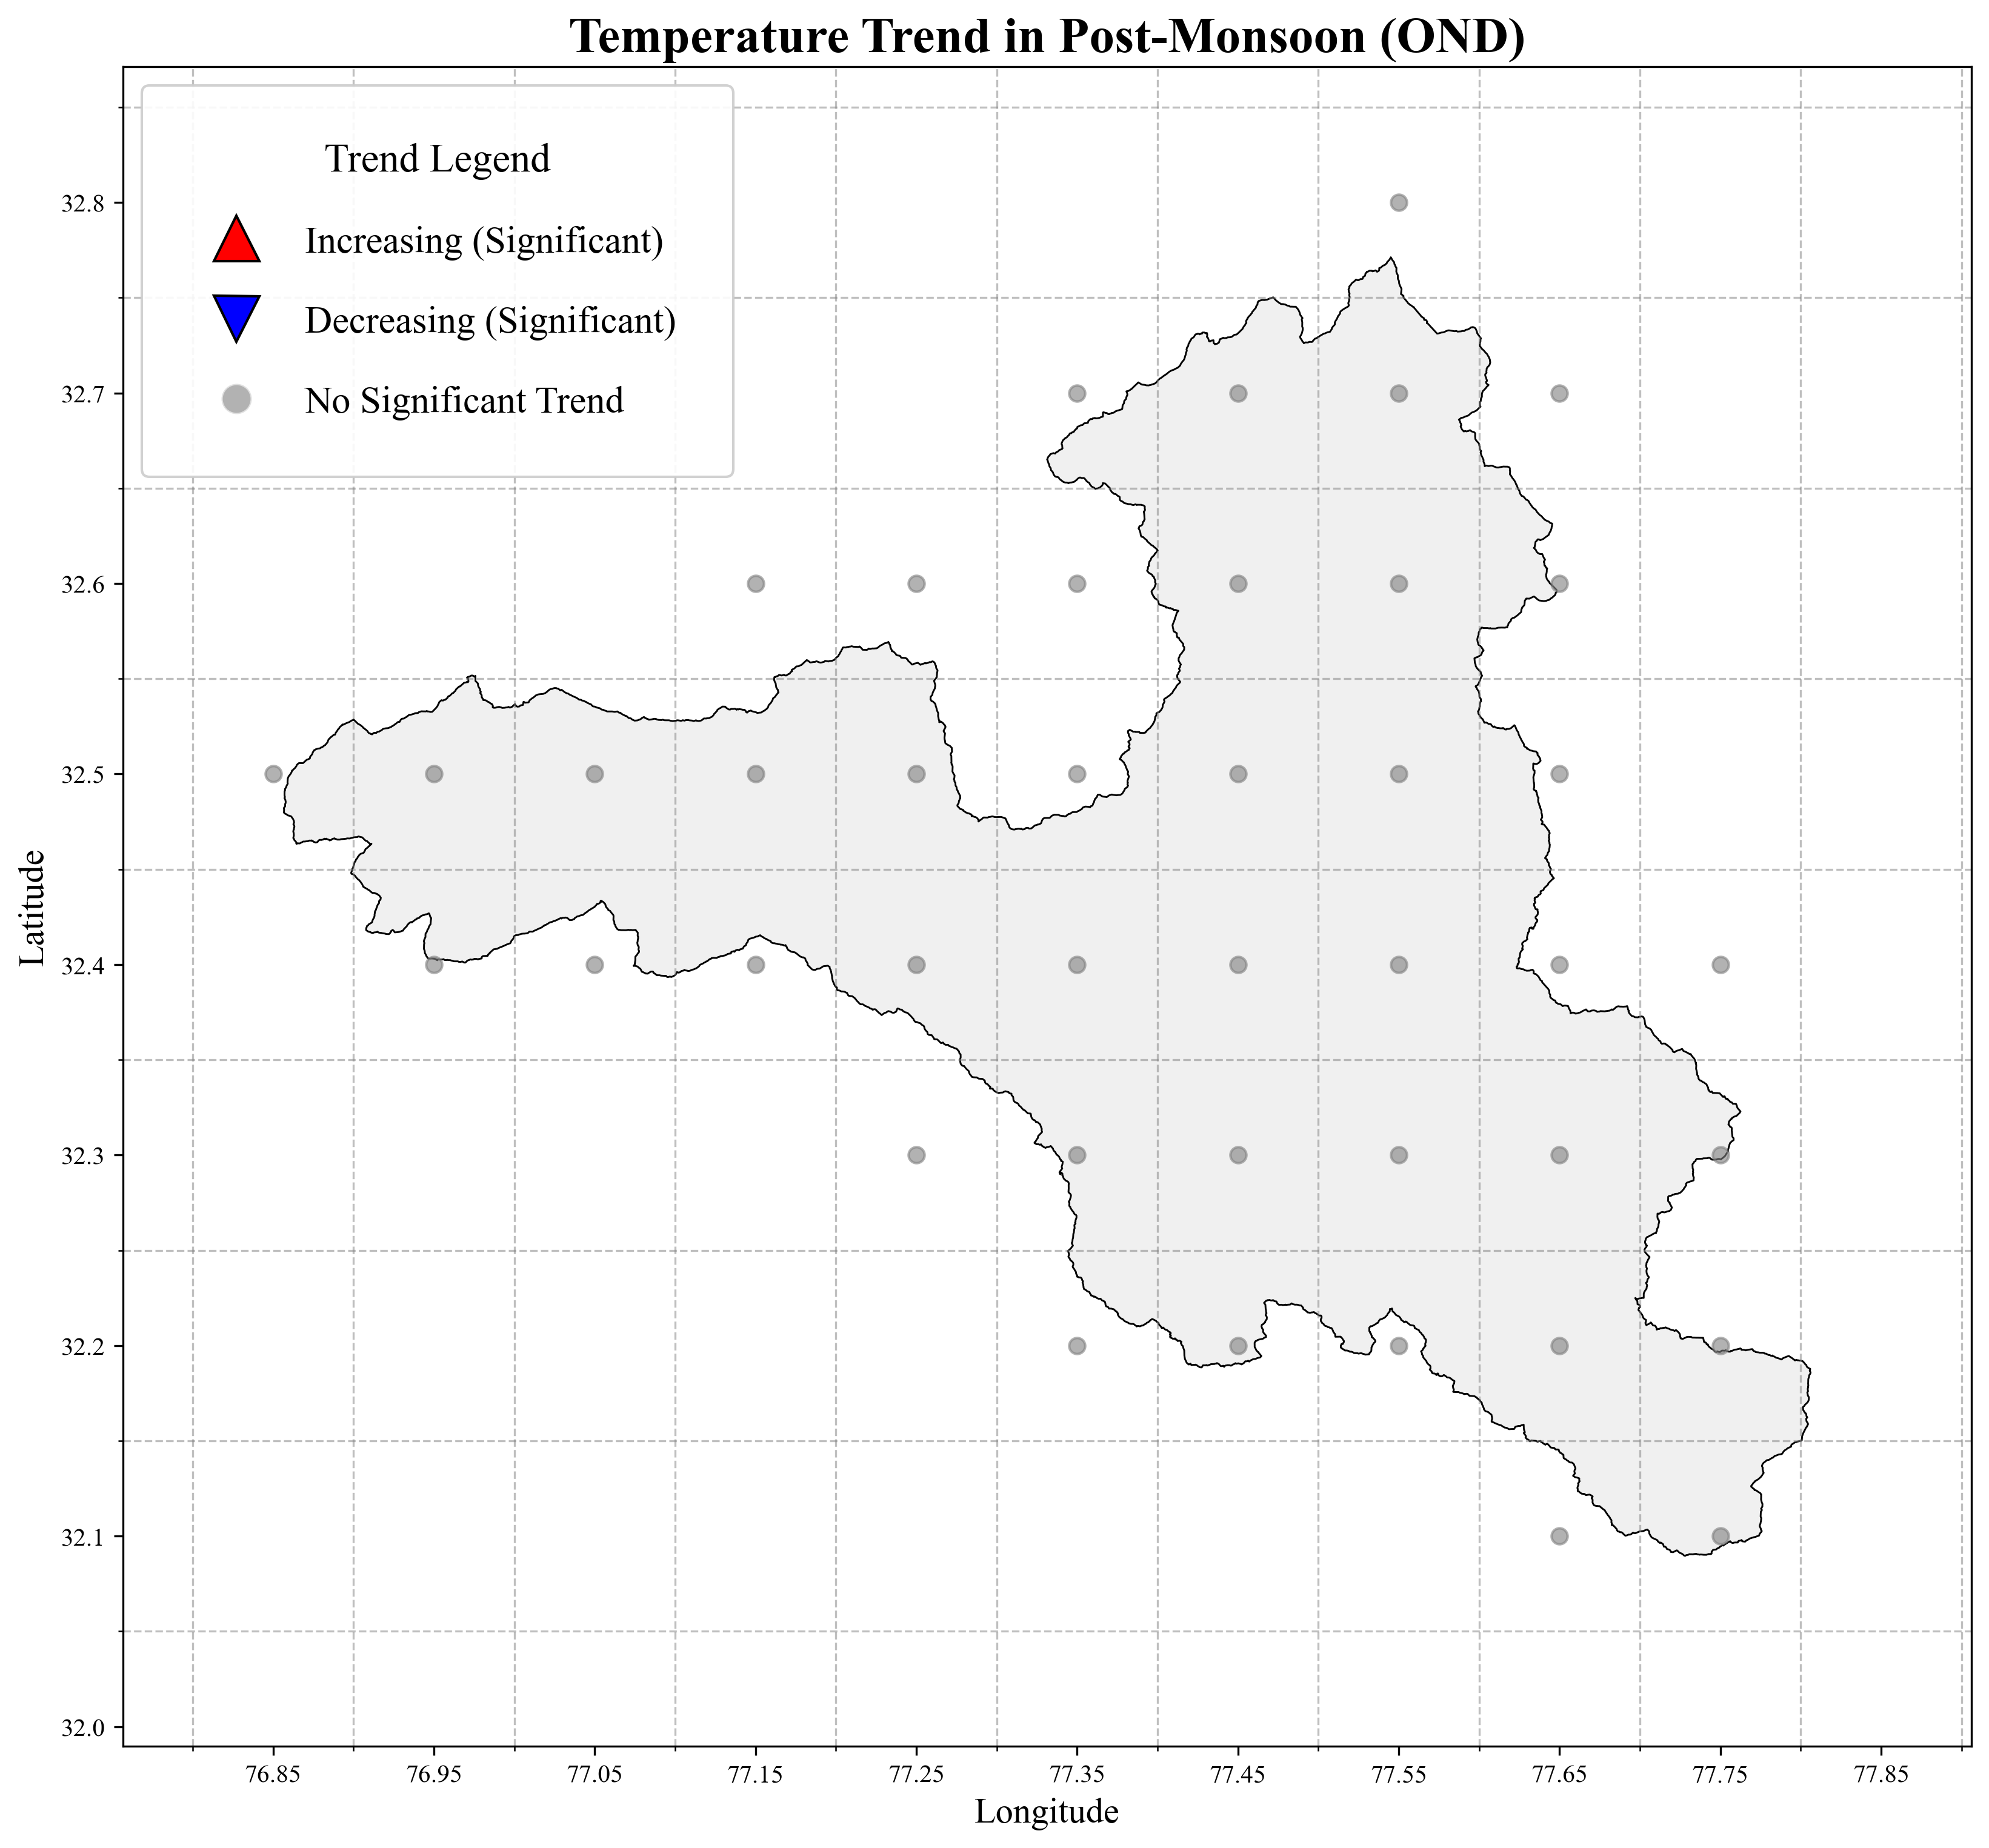


**Spatial Annual and Seasonal M-K Trend Maps of Temperature**

**Fig. S2** Spatial Trend Analysis of total precipitation **S2a** – Spatial trend of annual total precipitation **S2b** – Spatial trend of winter total precipitation. **S2c** – Spatial trend of pre-monsoon total precipitation **S2d** – Spatial trend of monsoon total precipitation. **S1e** – Spatial trend of post-monsoon total precipitation


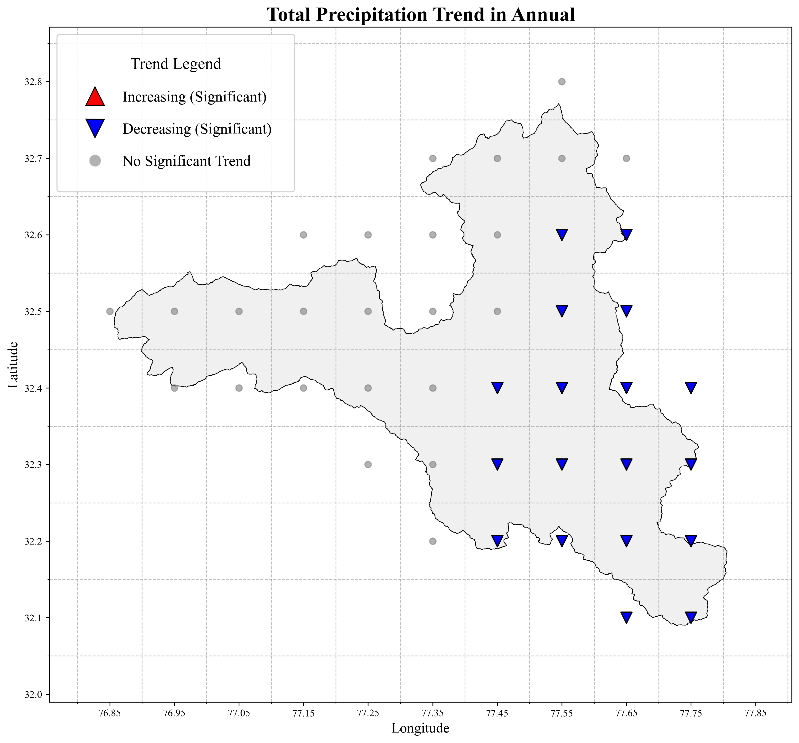

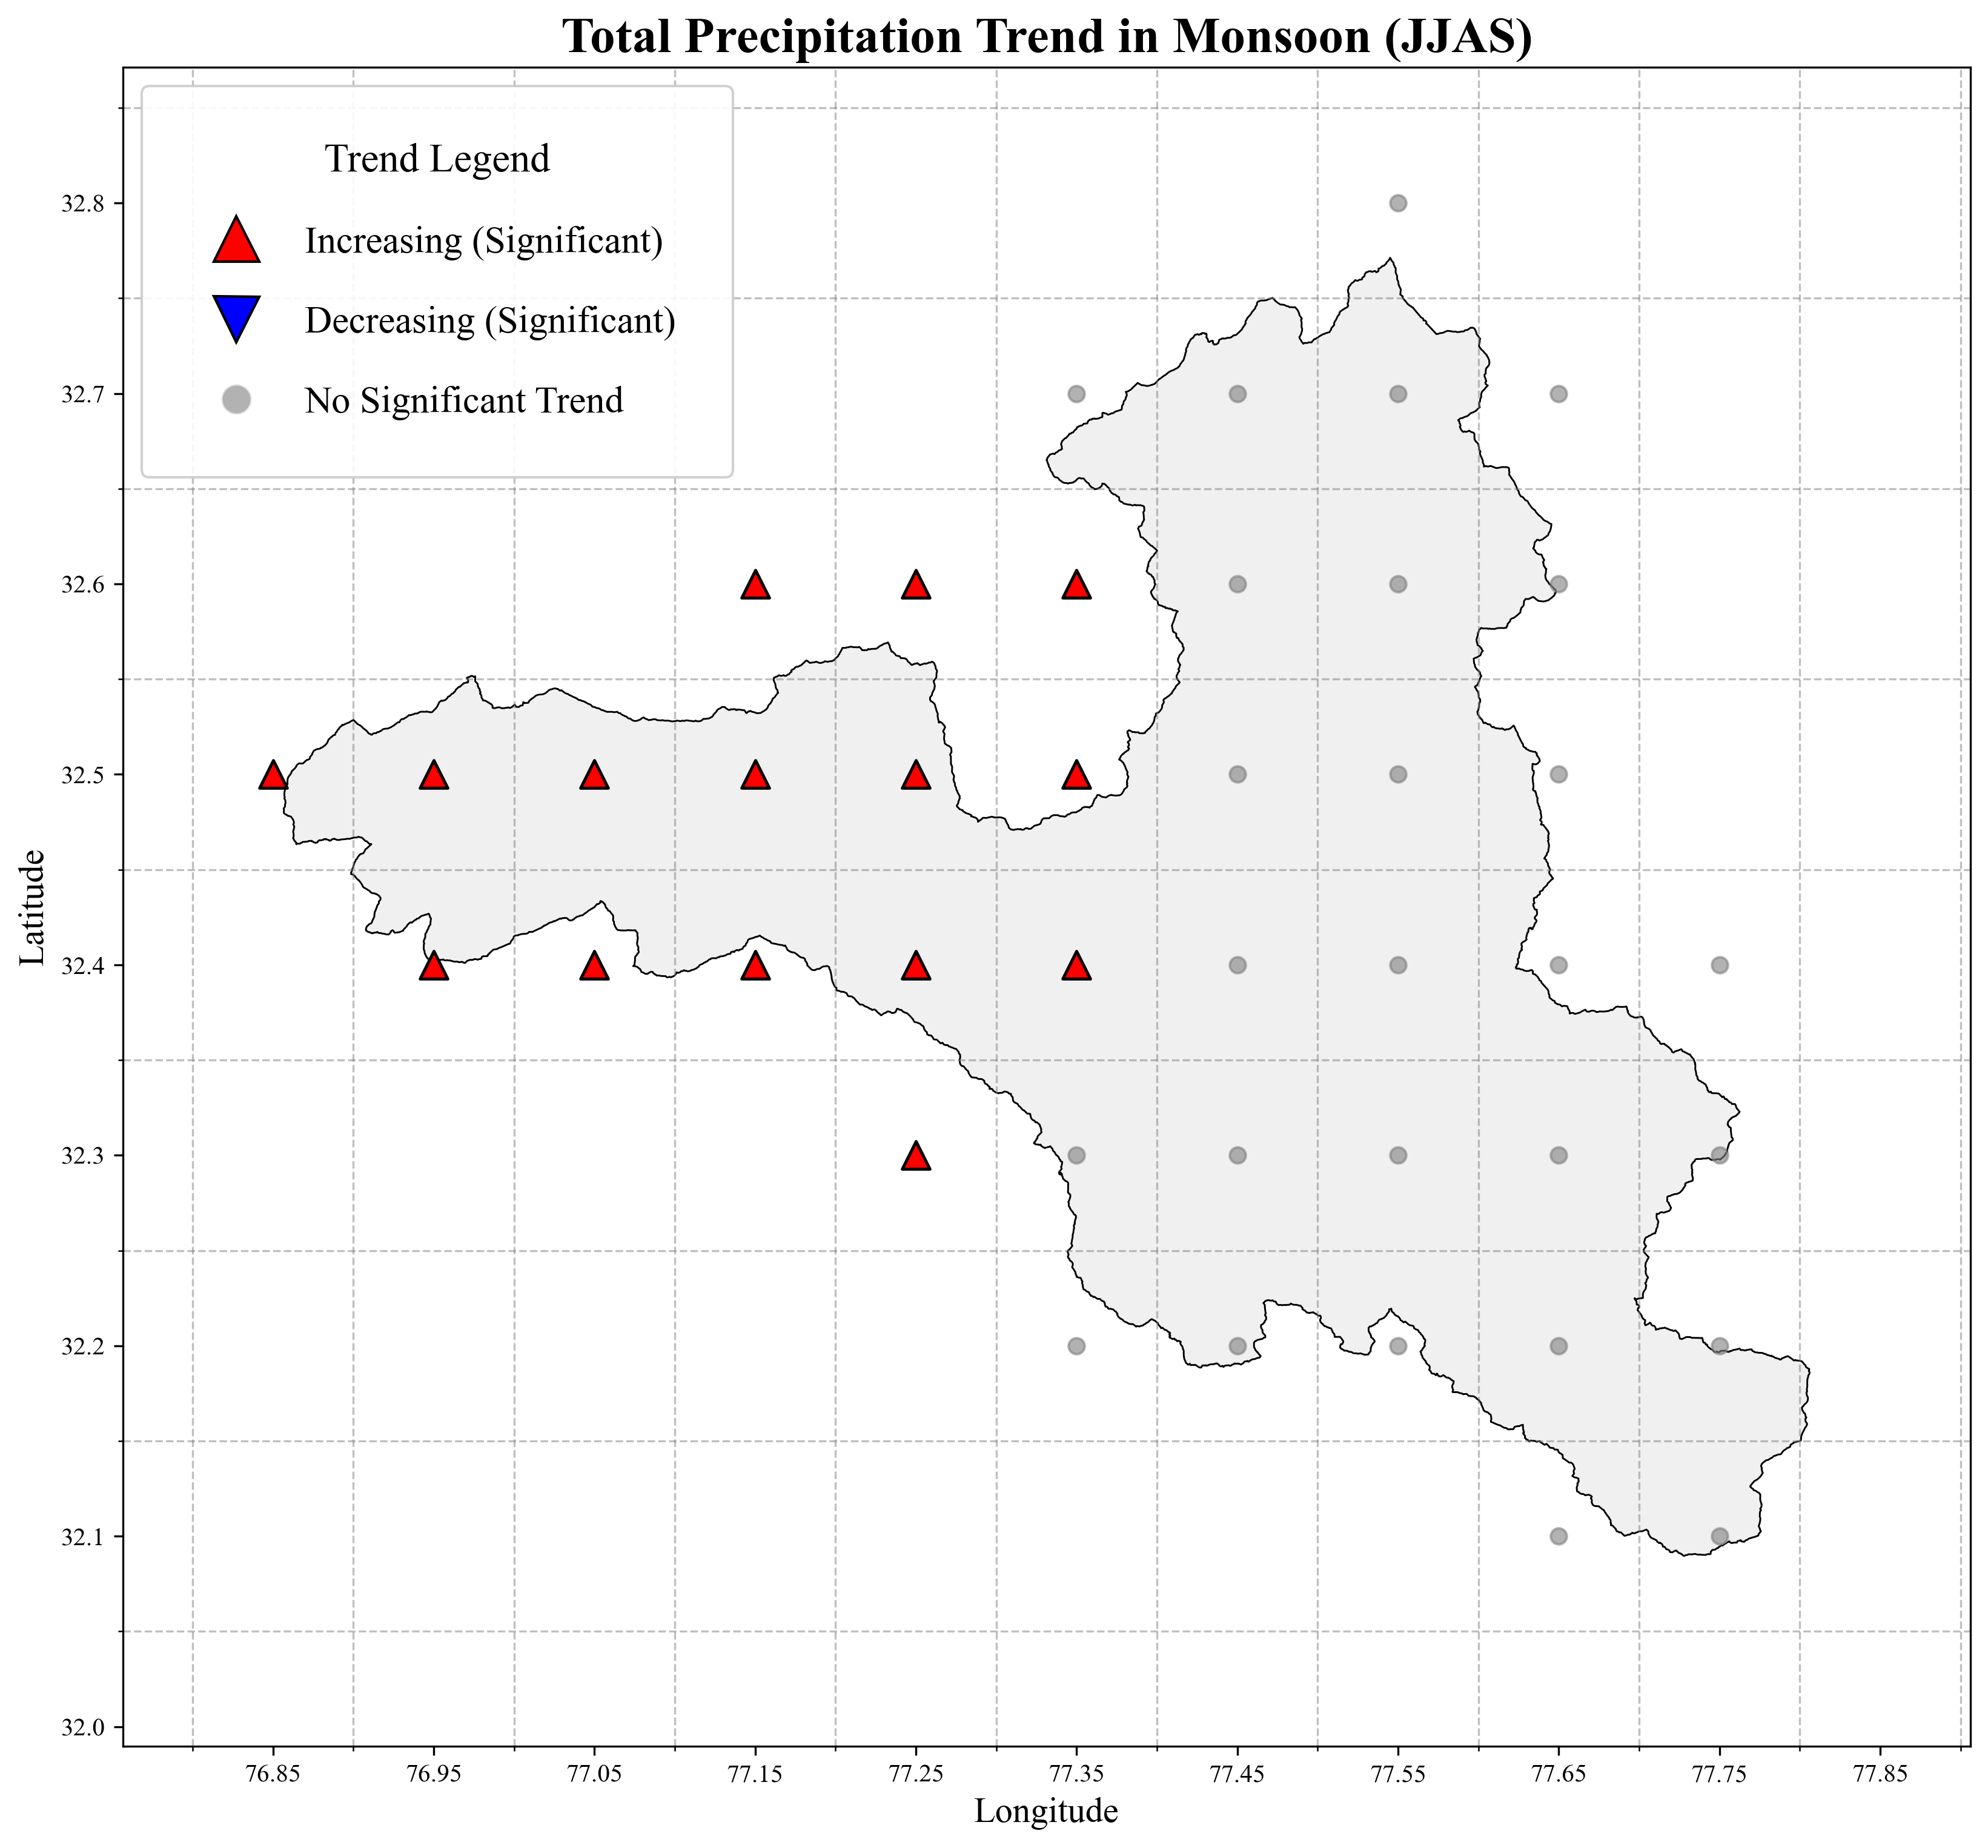

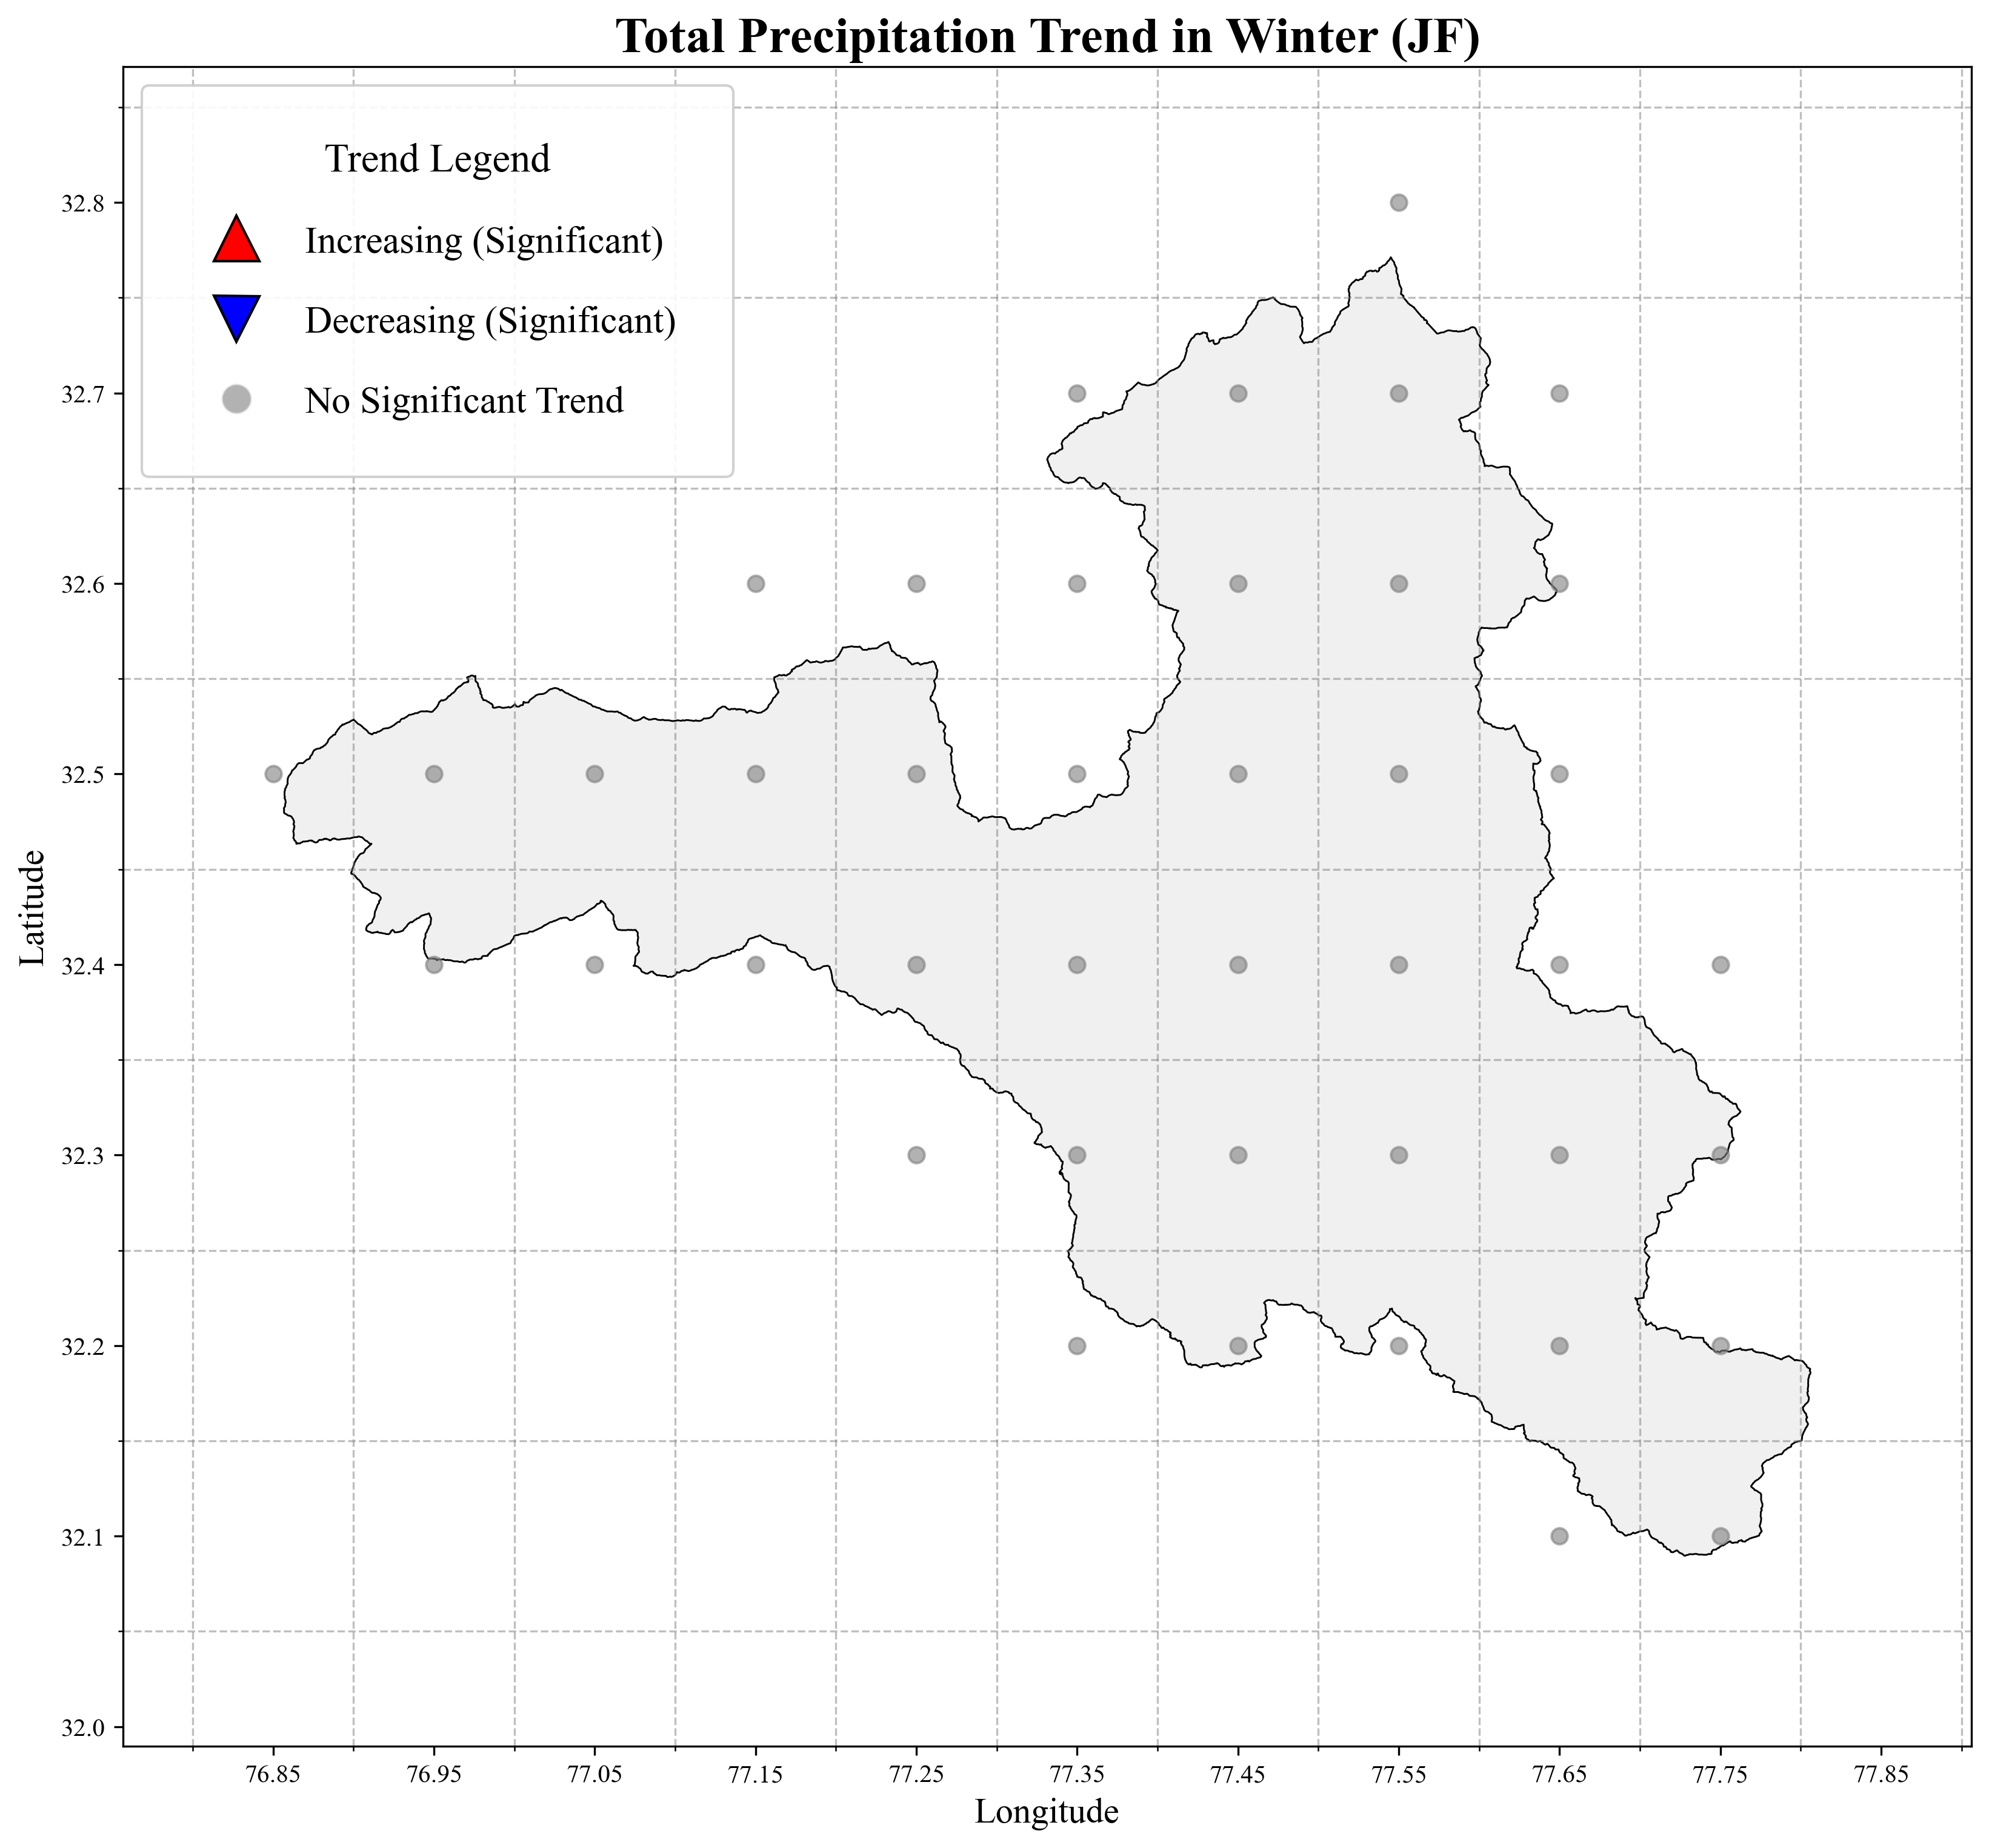

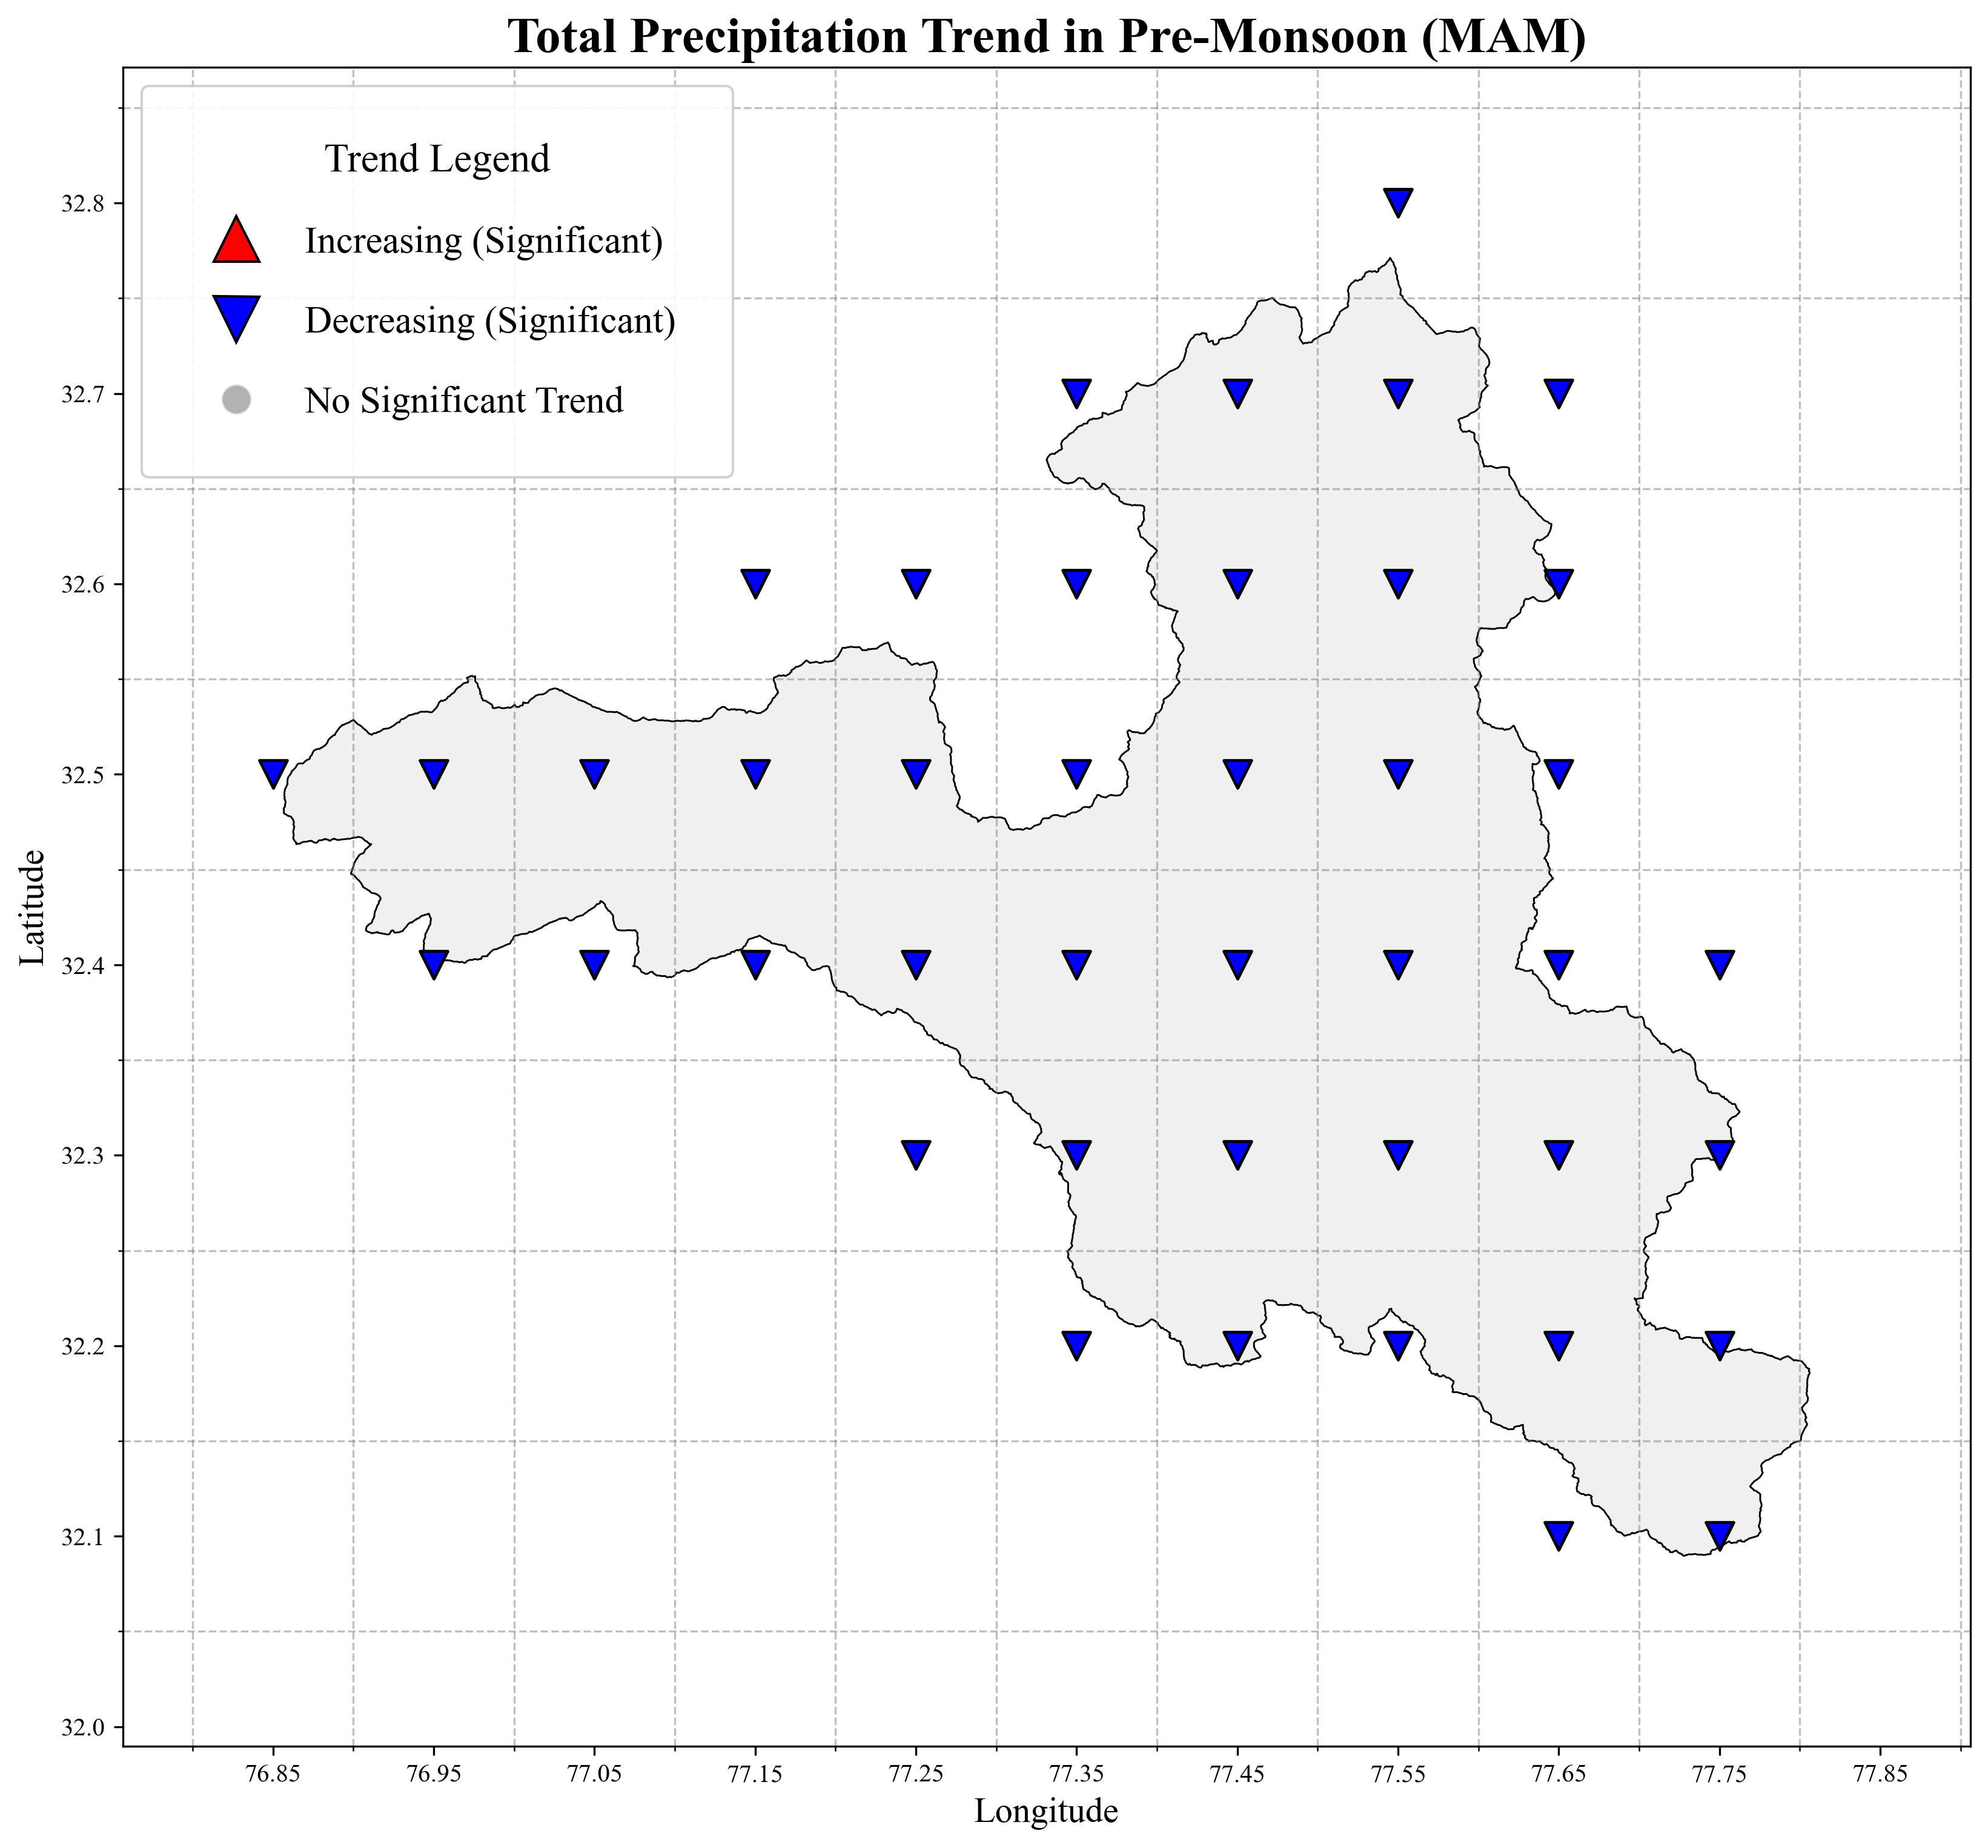

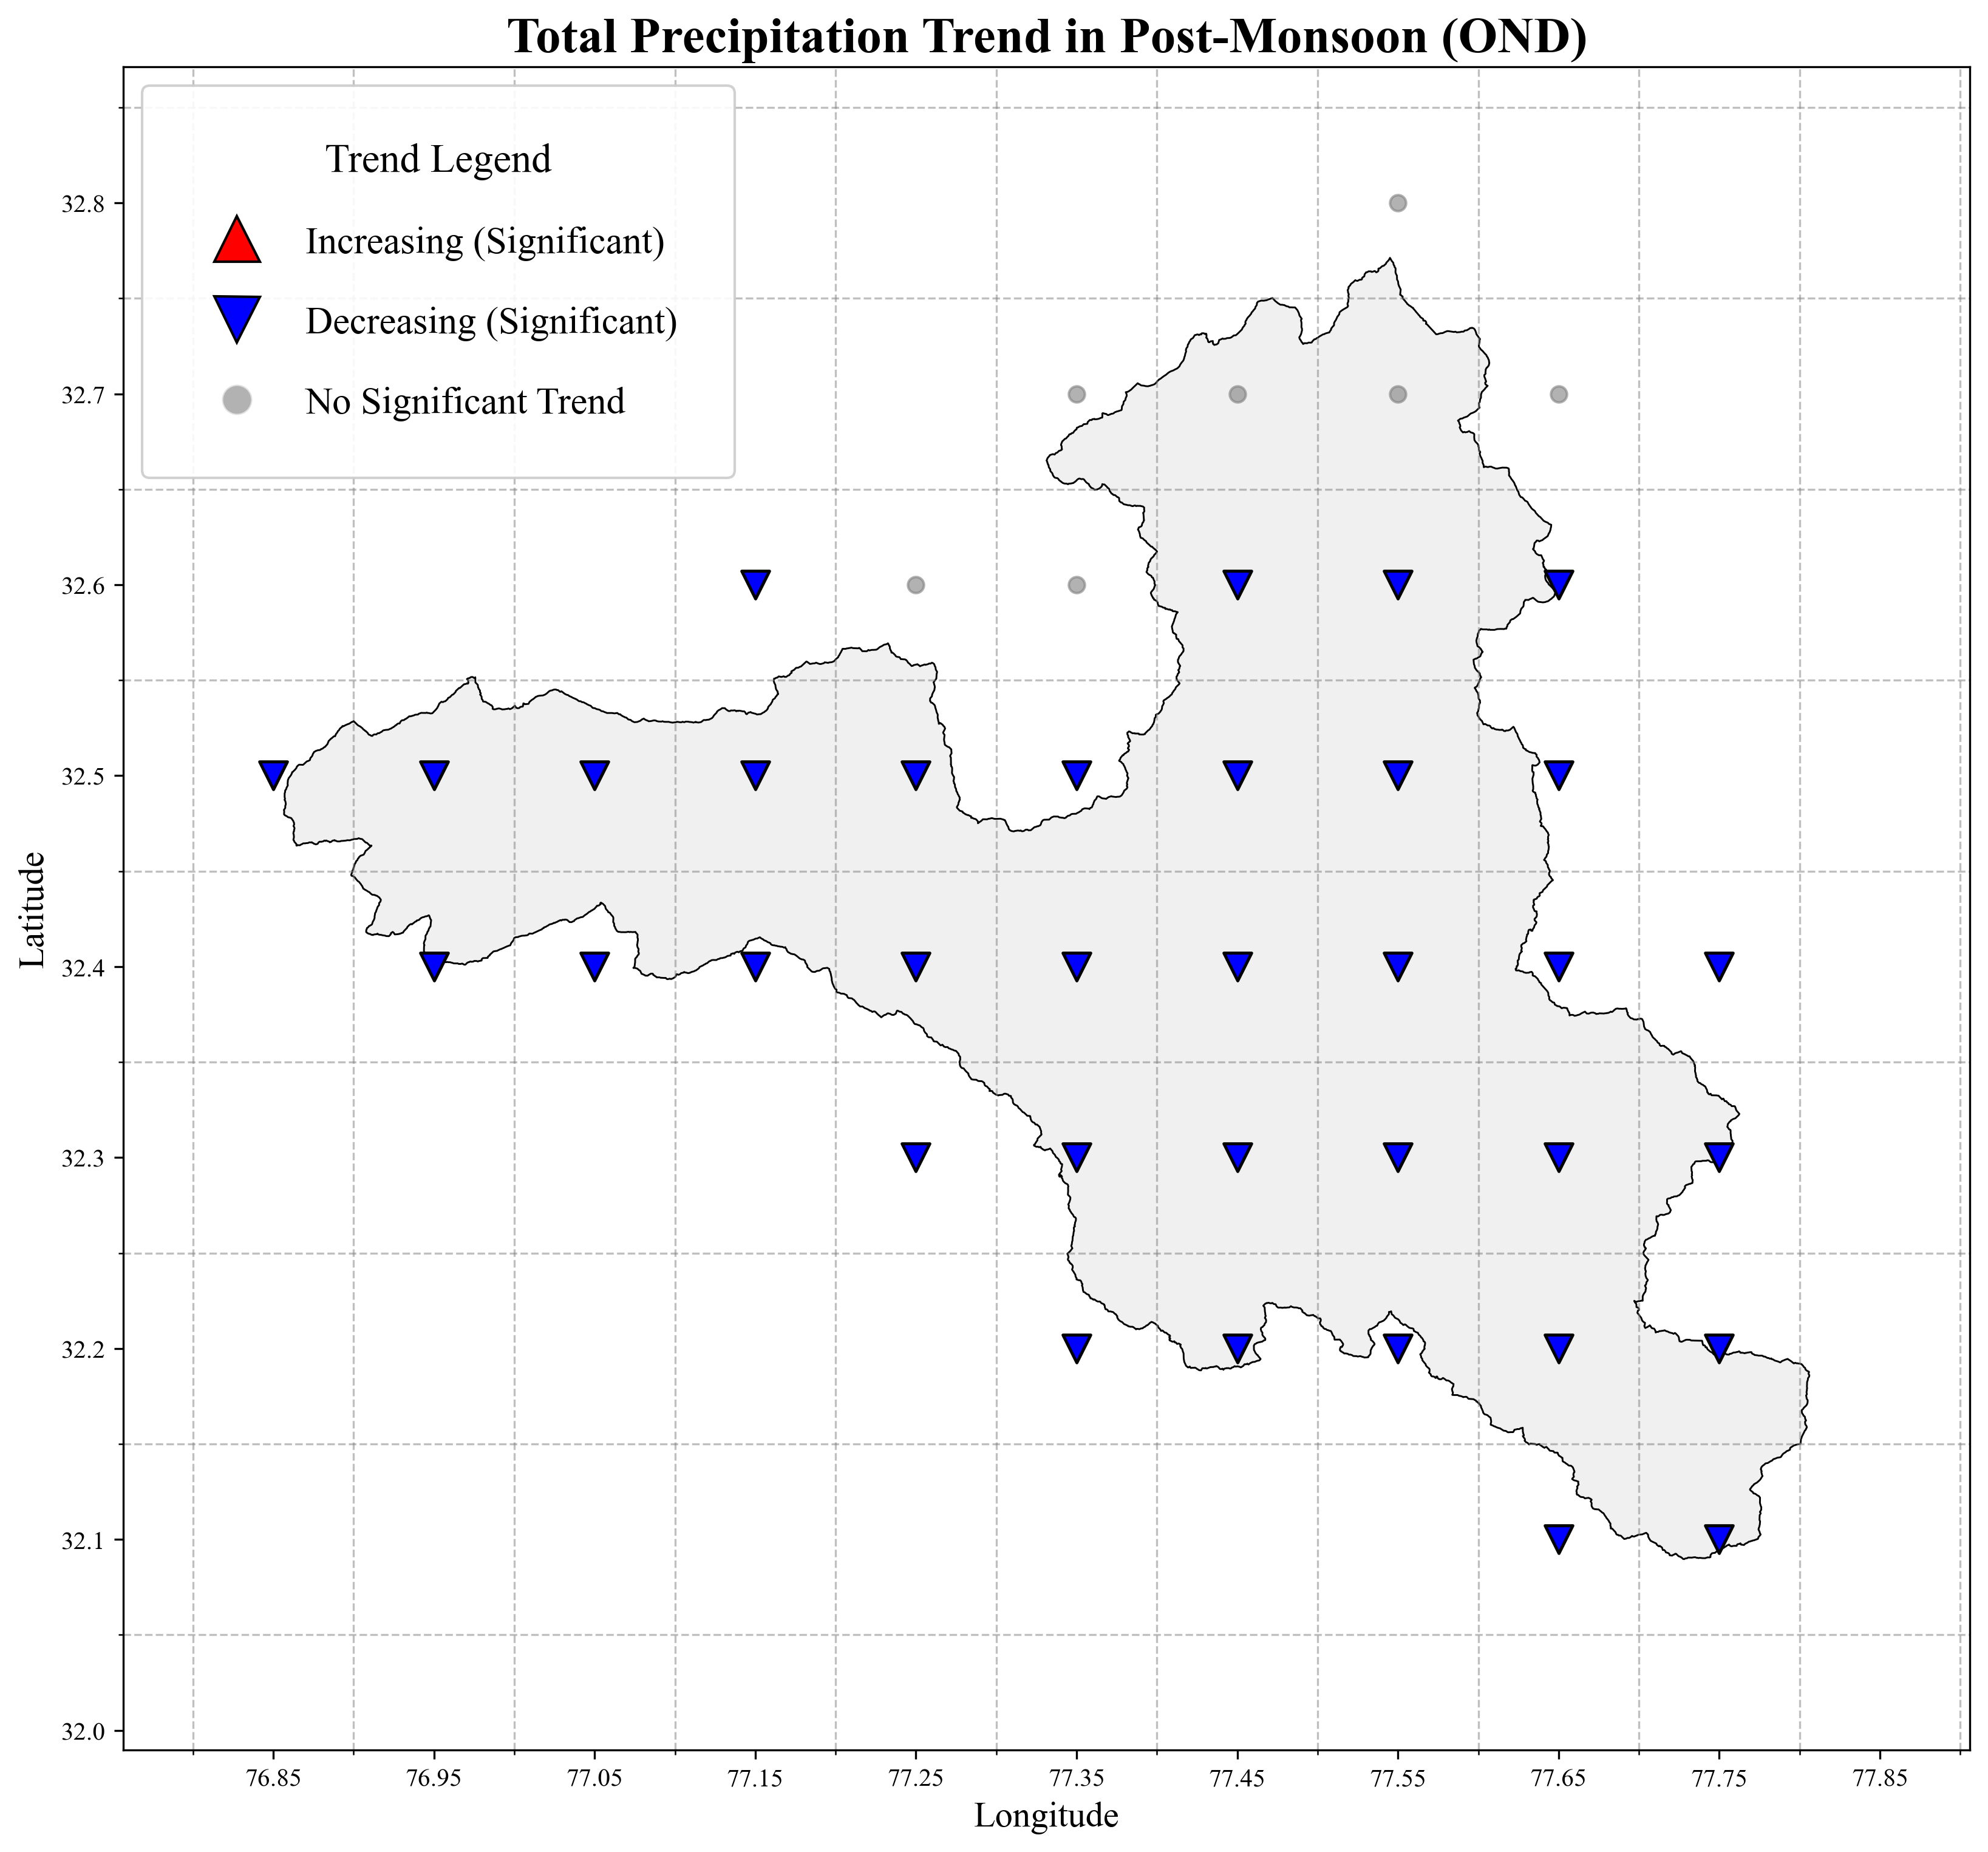


**Spatial Annual and Seasonal M-K Trend Maps of Total Precipitation**

**Fig. S3** Spatial Trend Analysis of rainfall. **S3a** – Spatial trend of annual rainfall **S3b** – Spatial trend of winter rainfall **S3c** – Spatial trend of pre-monsoon rainfall. **S3d** – Spatial trend of monsoon rainfall. **S3e** – Spatial trend of post-monsoon rainfal


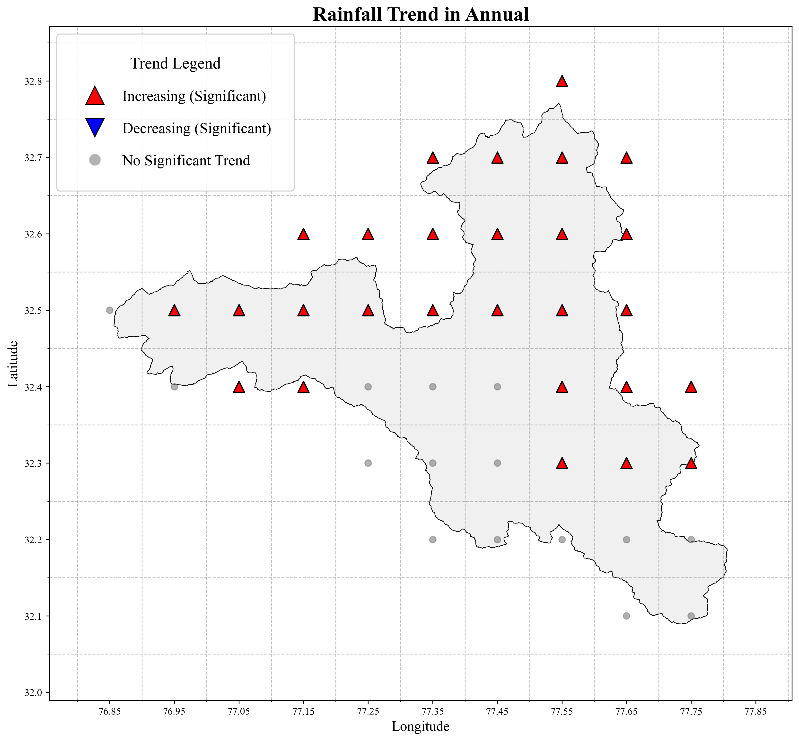

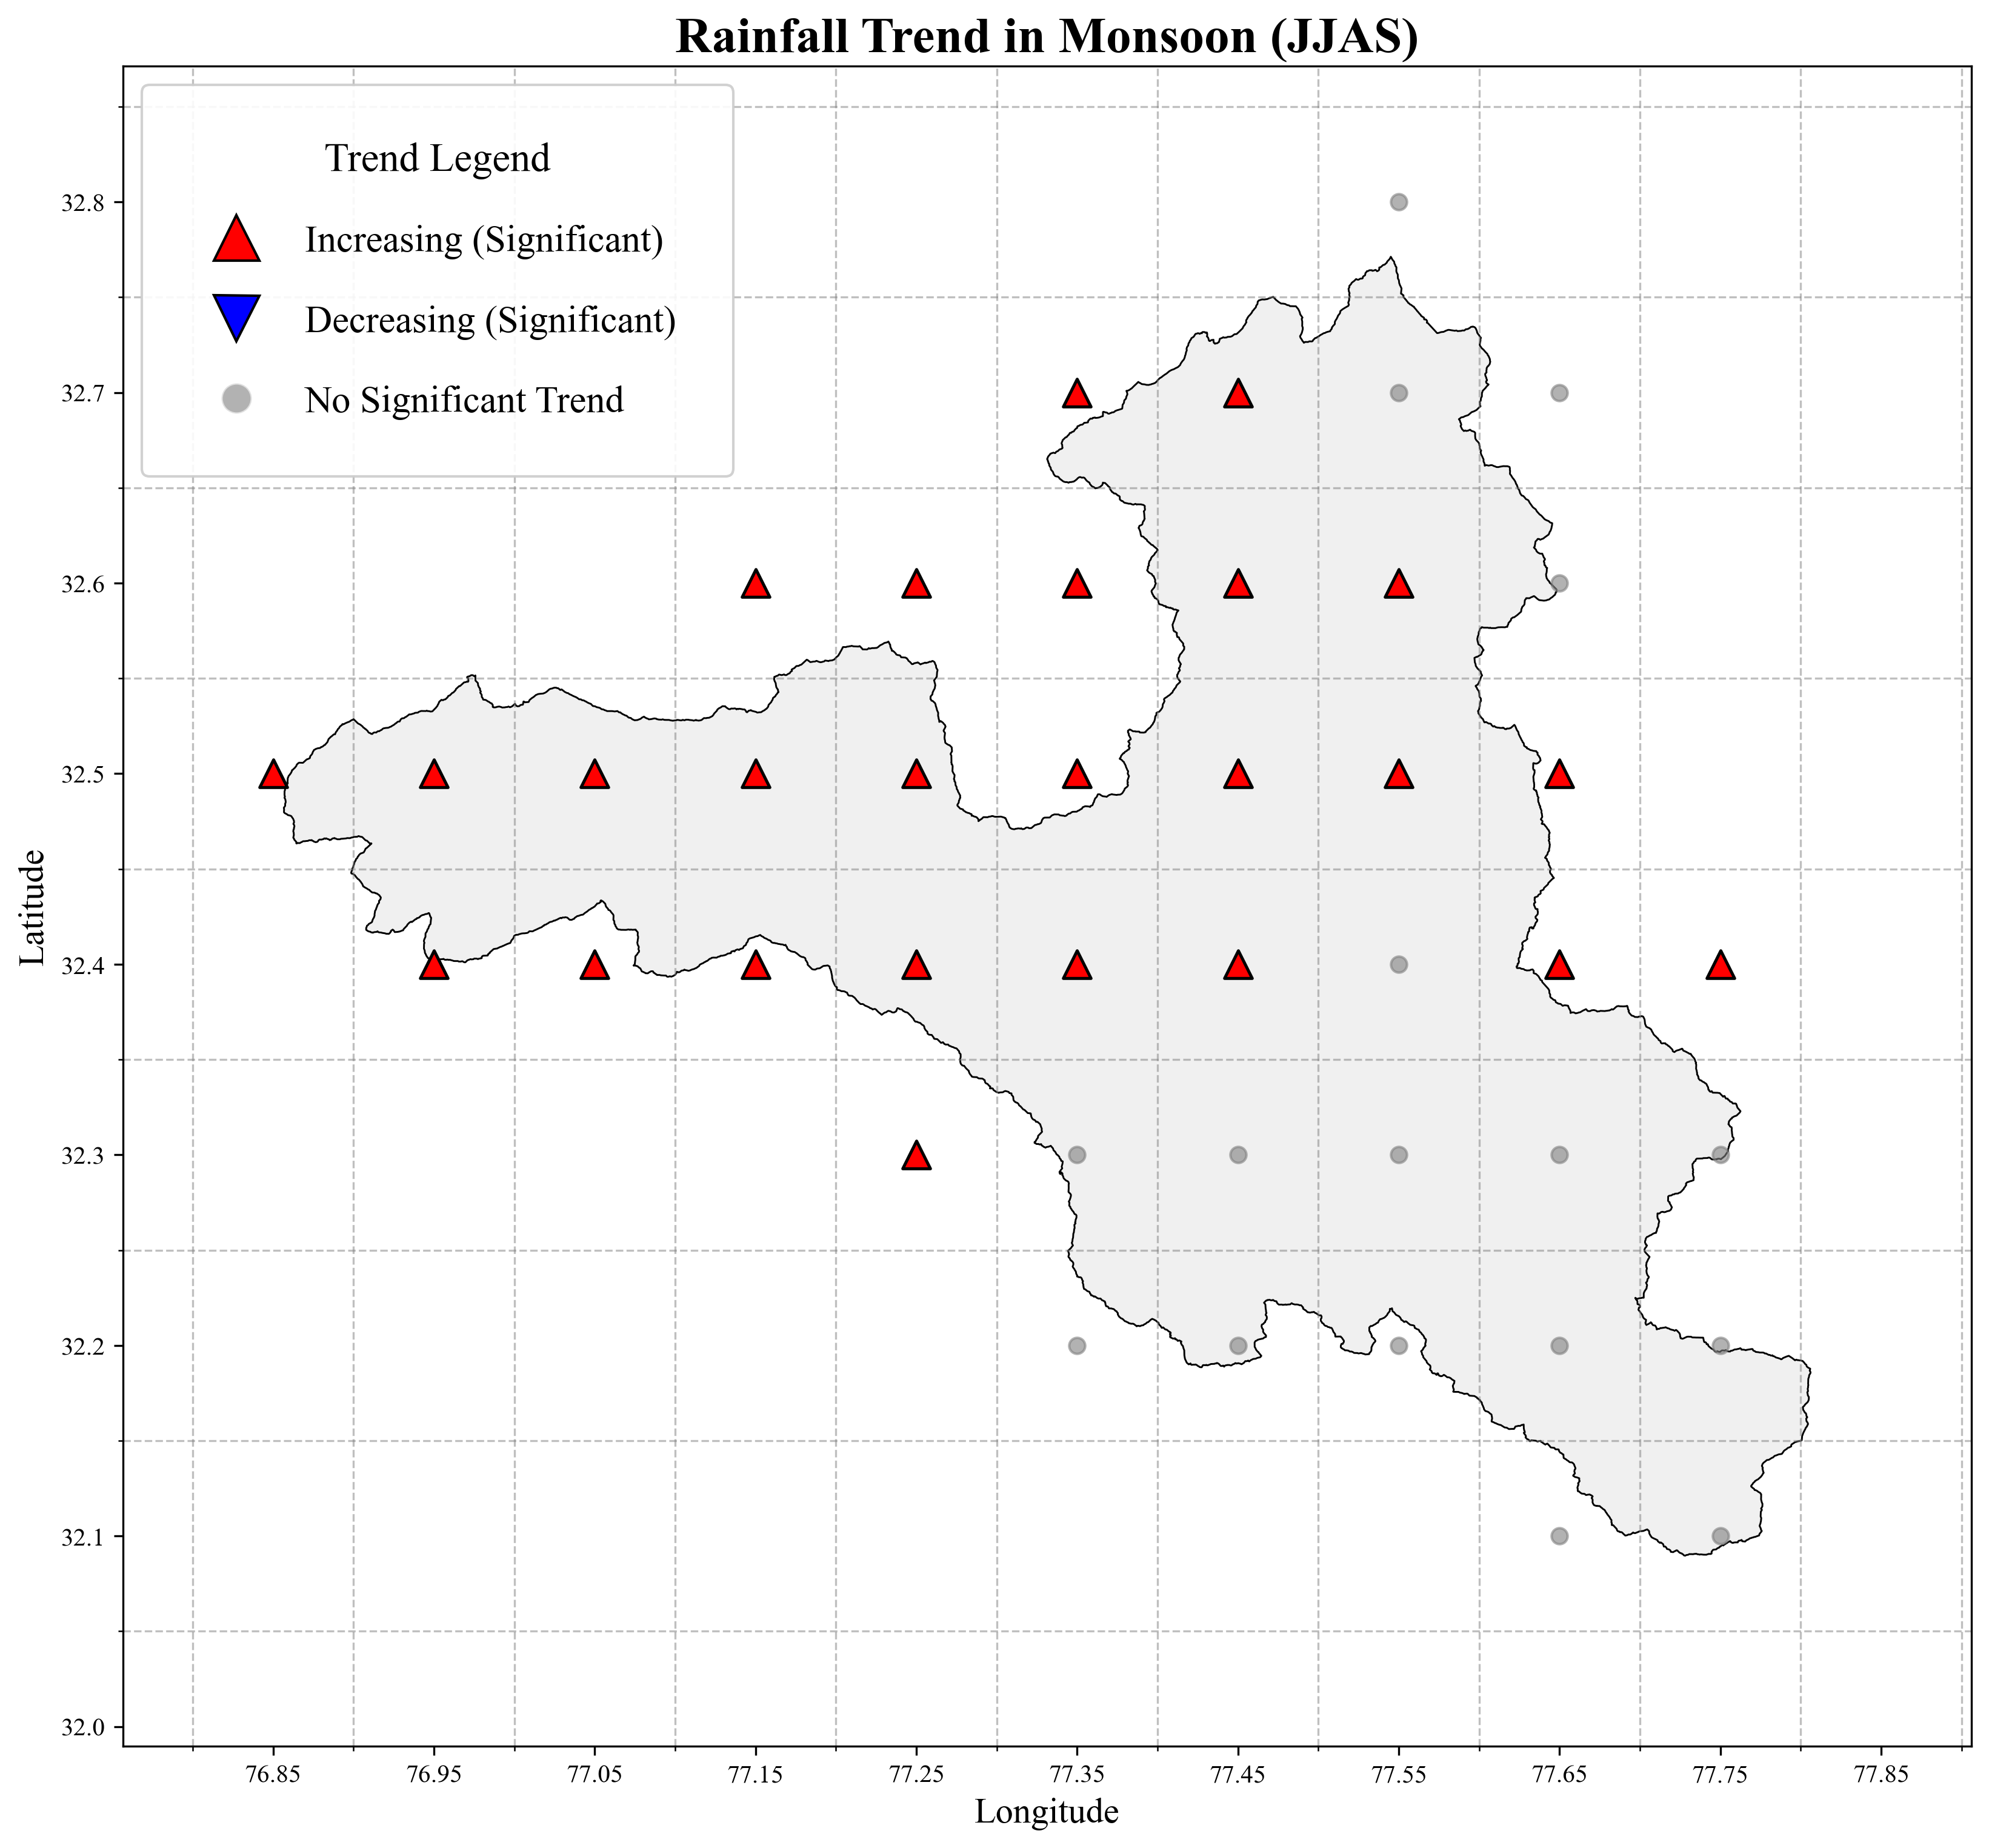

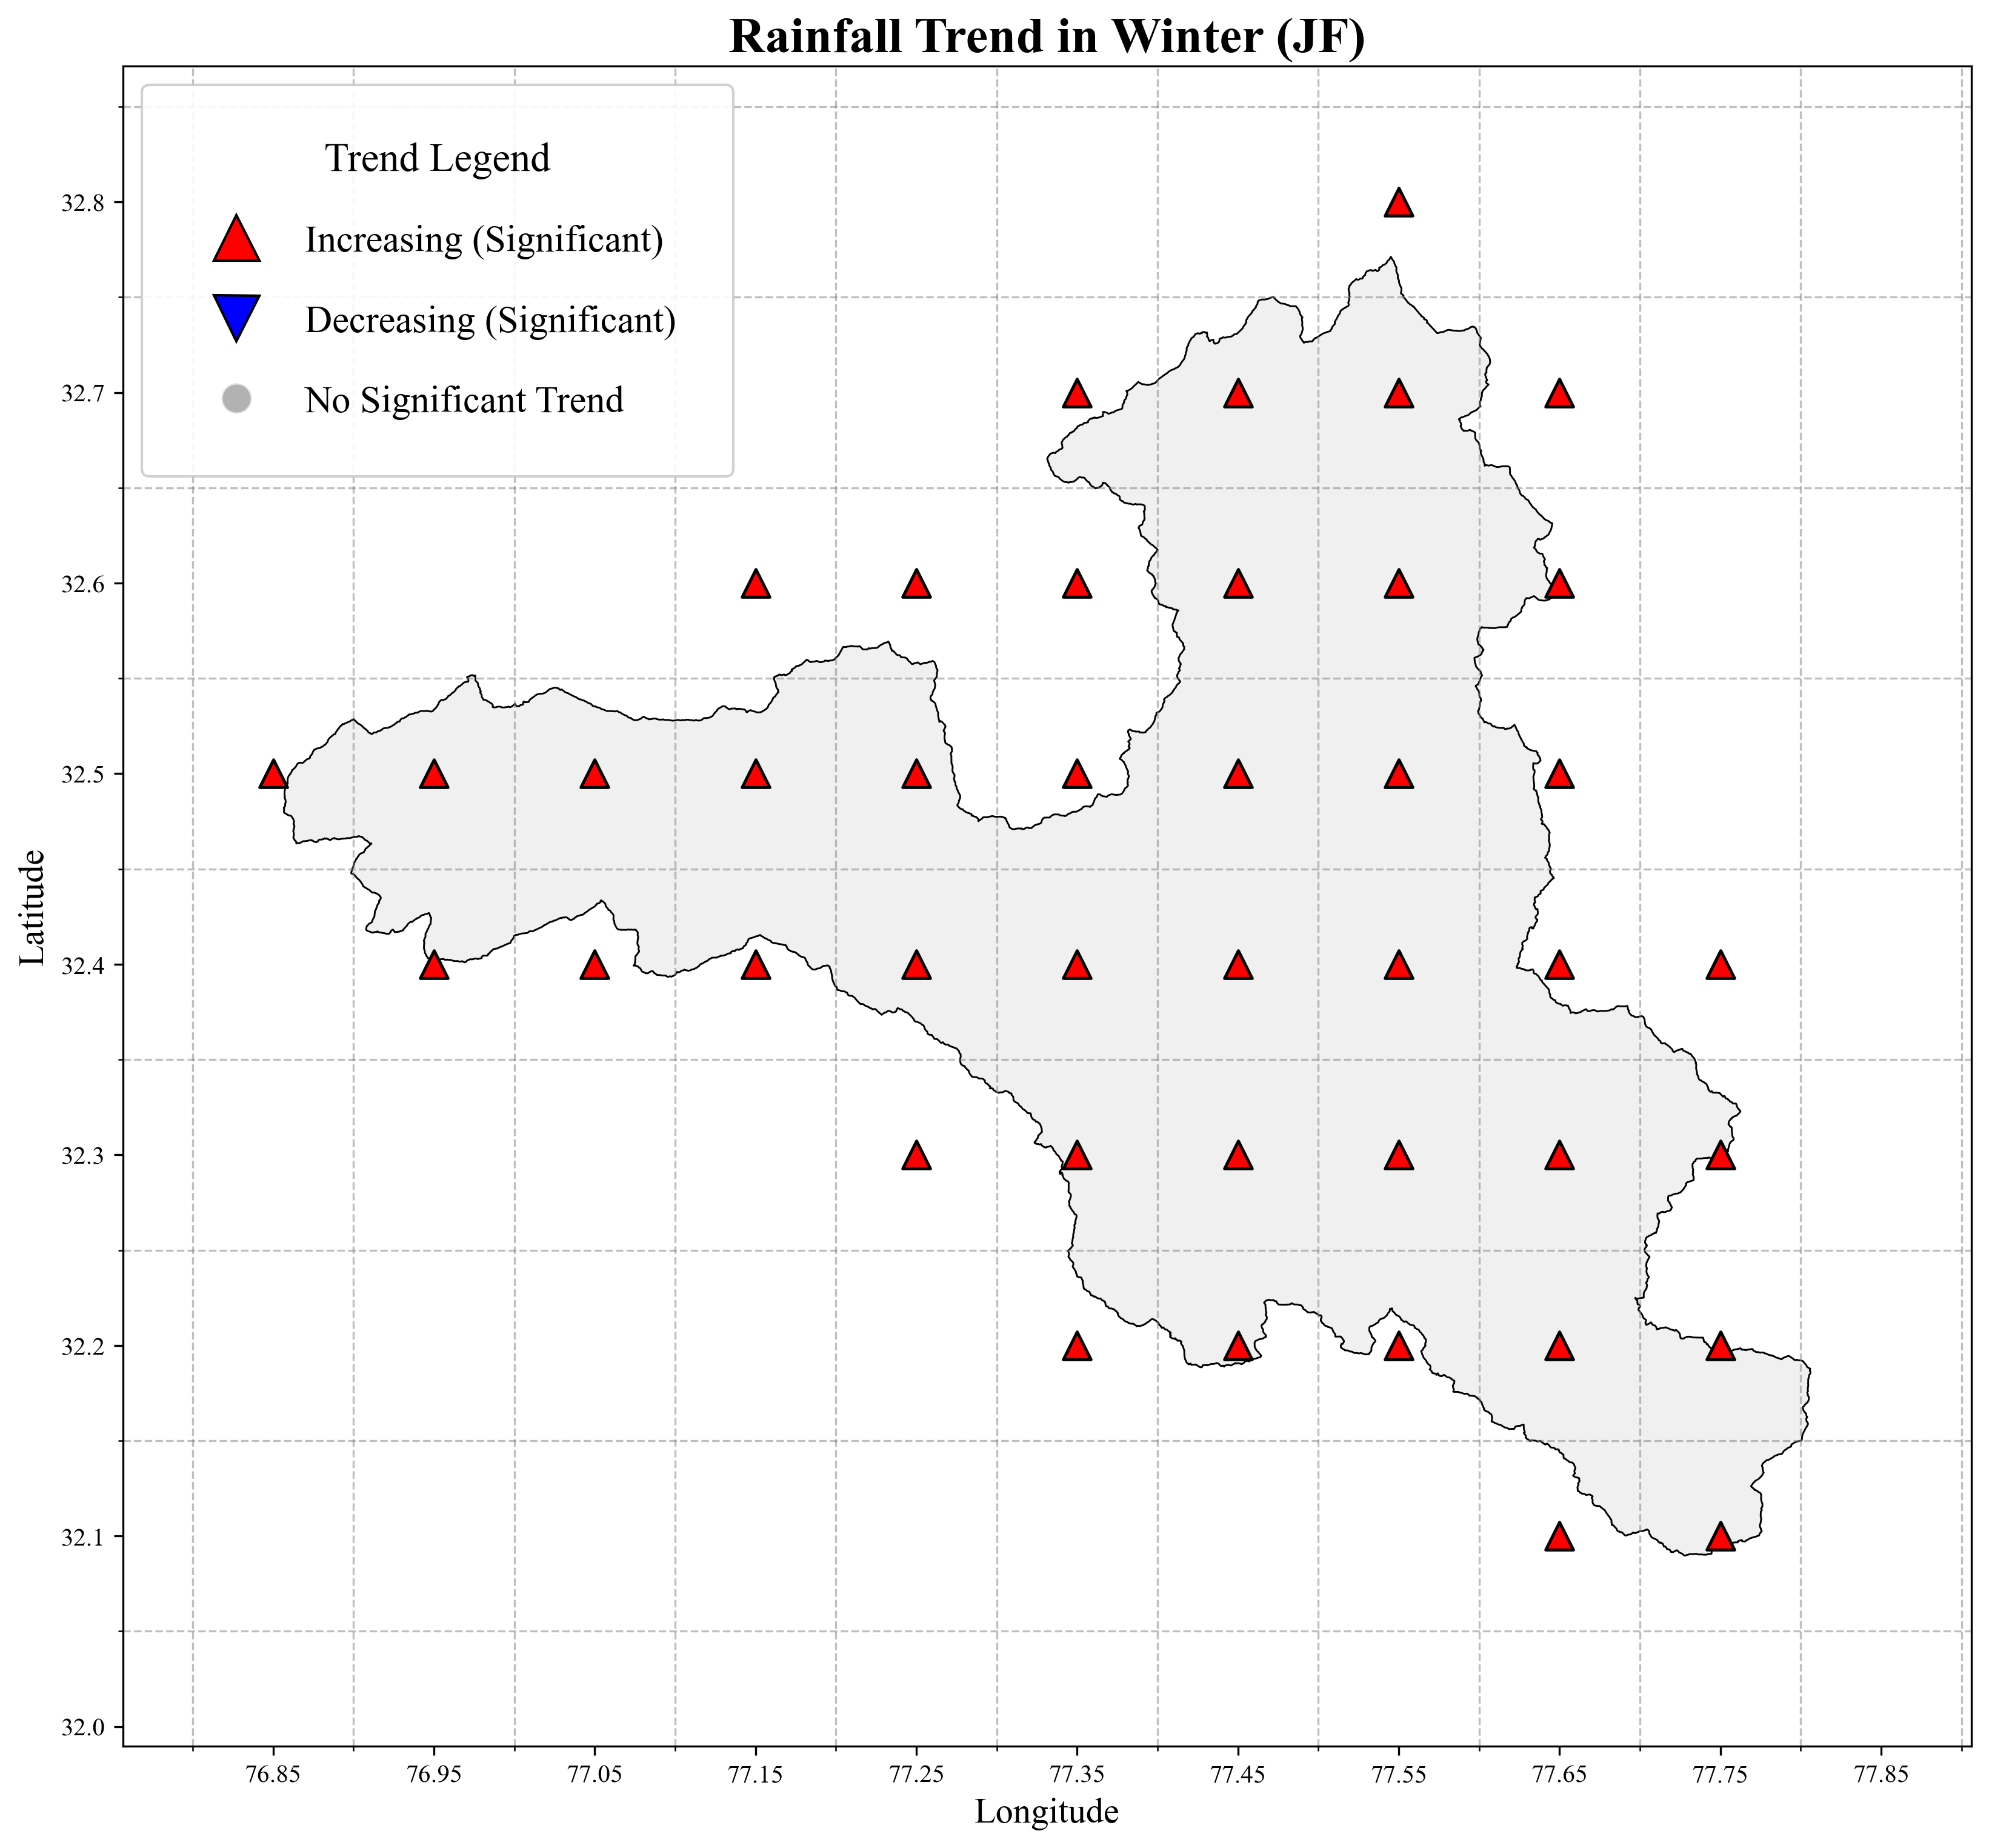

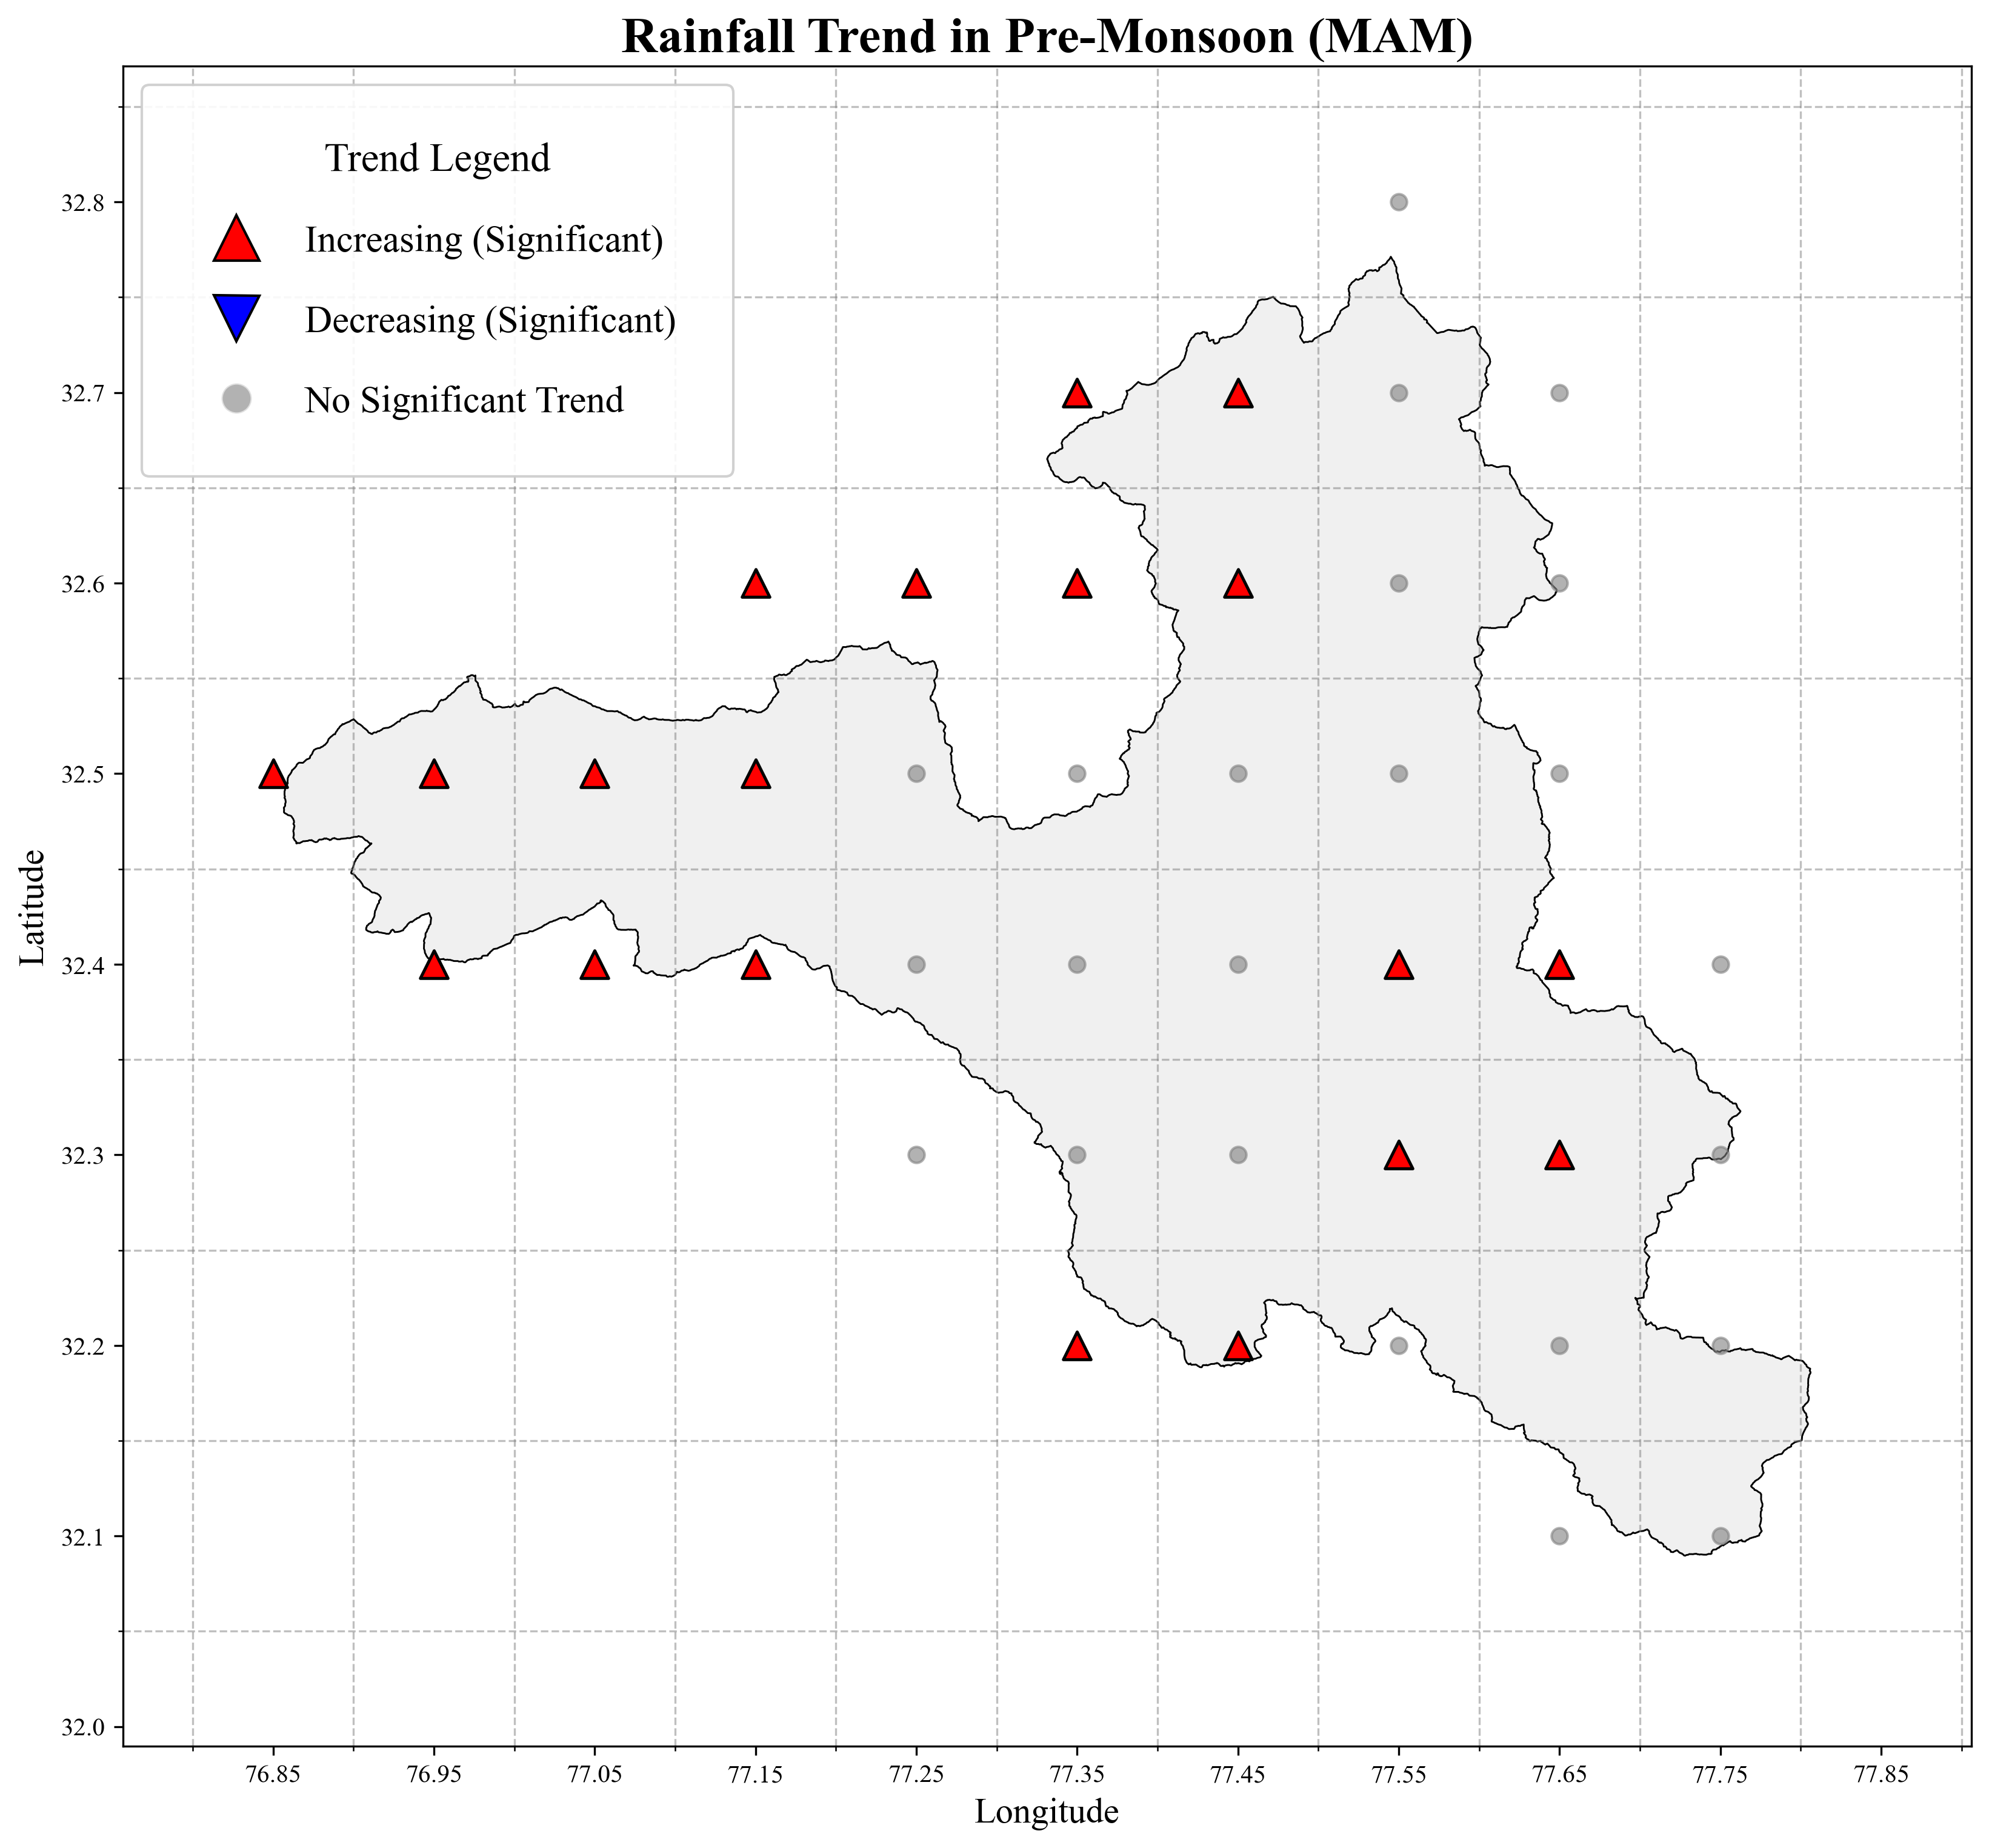

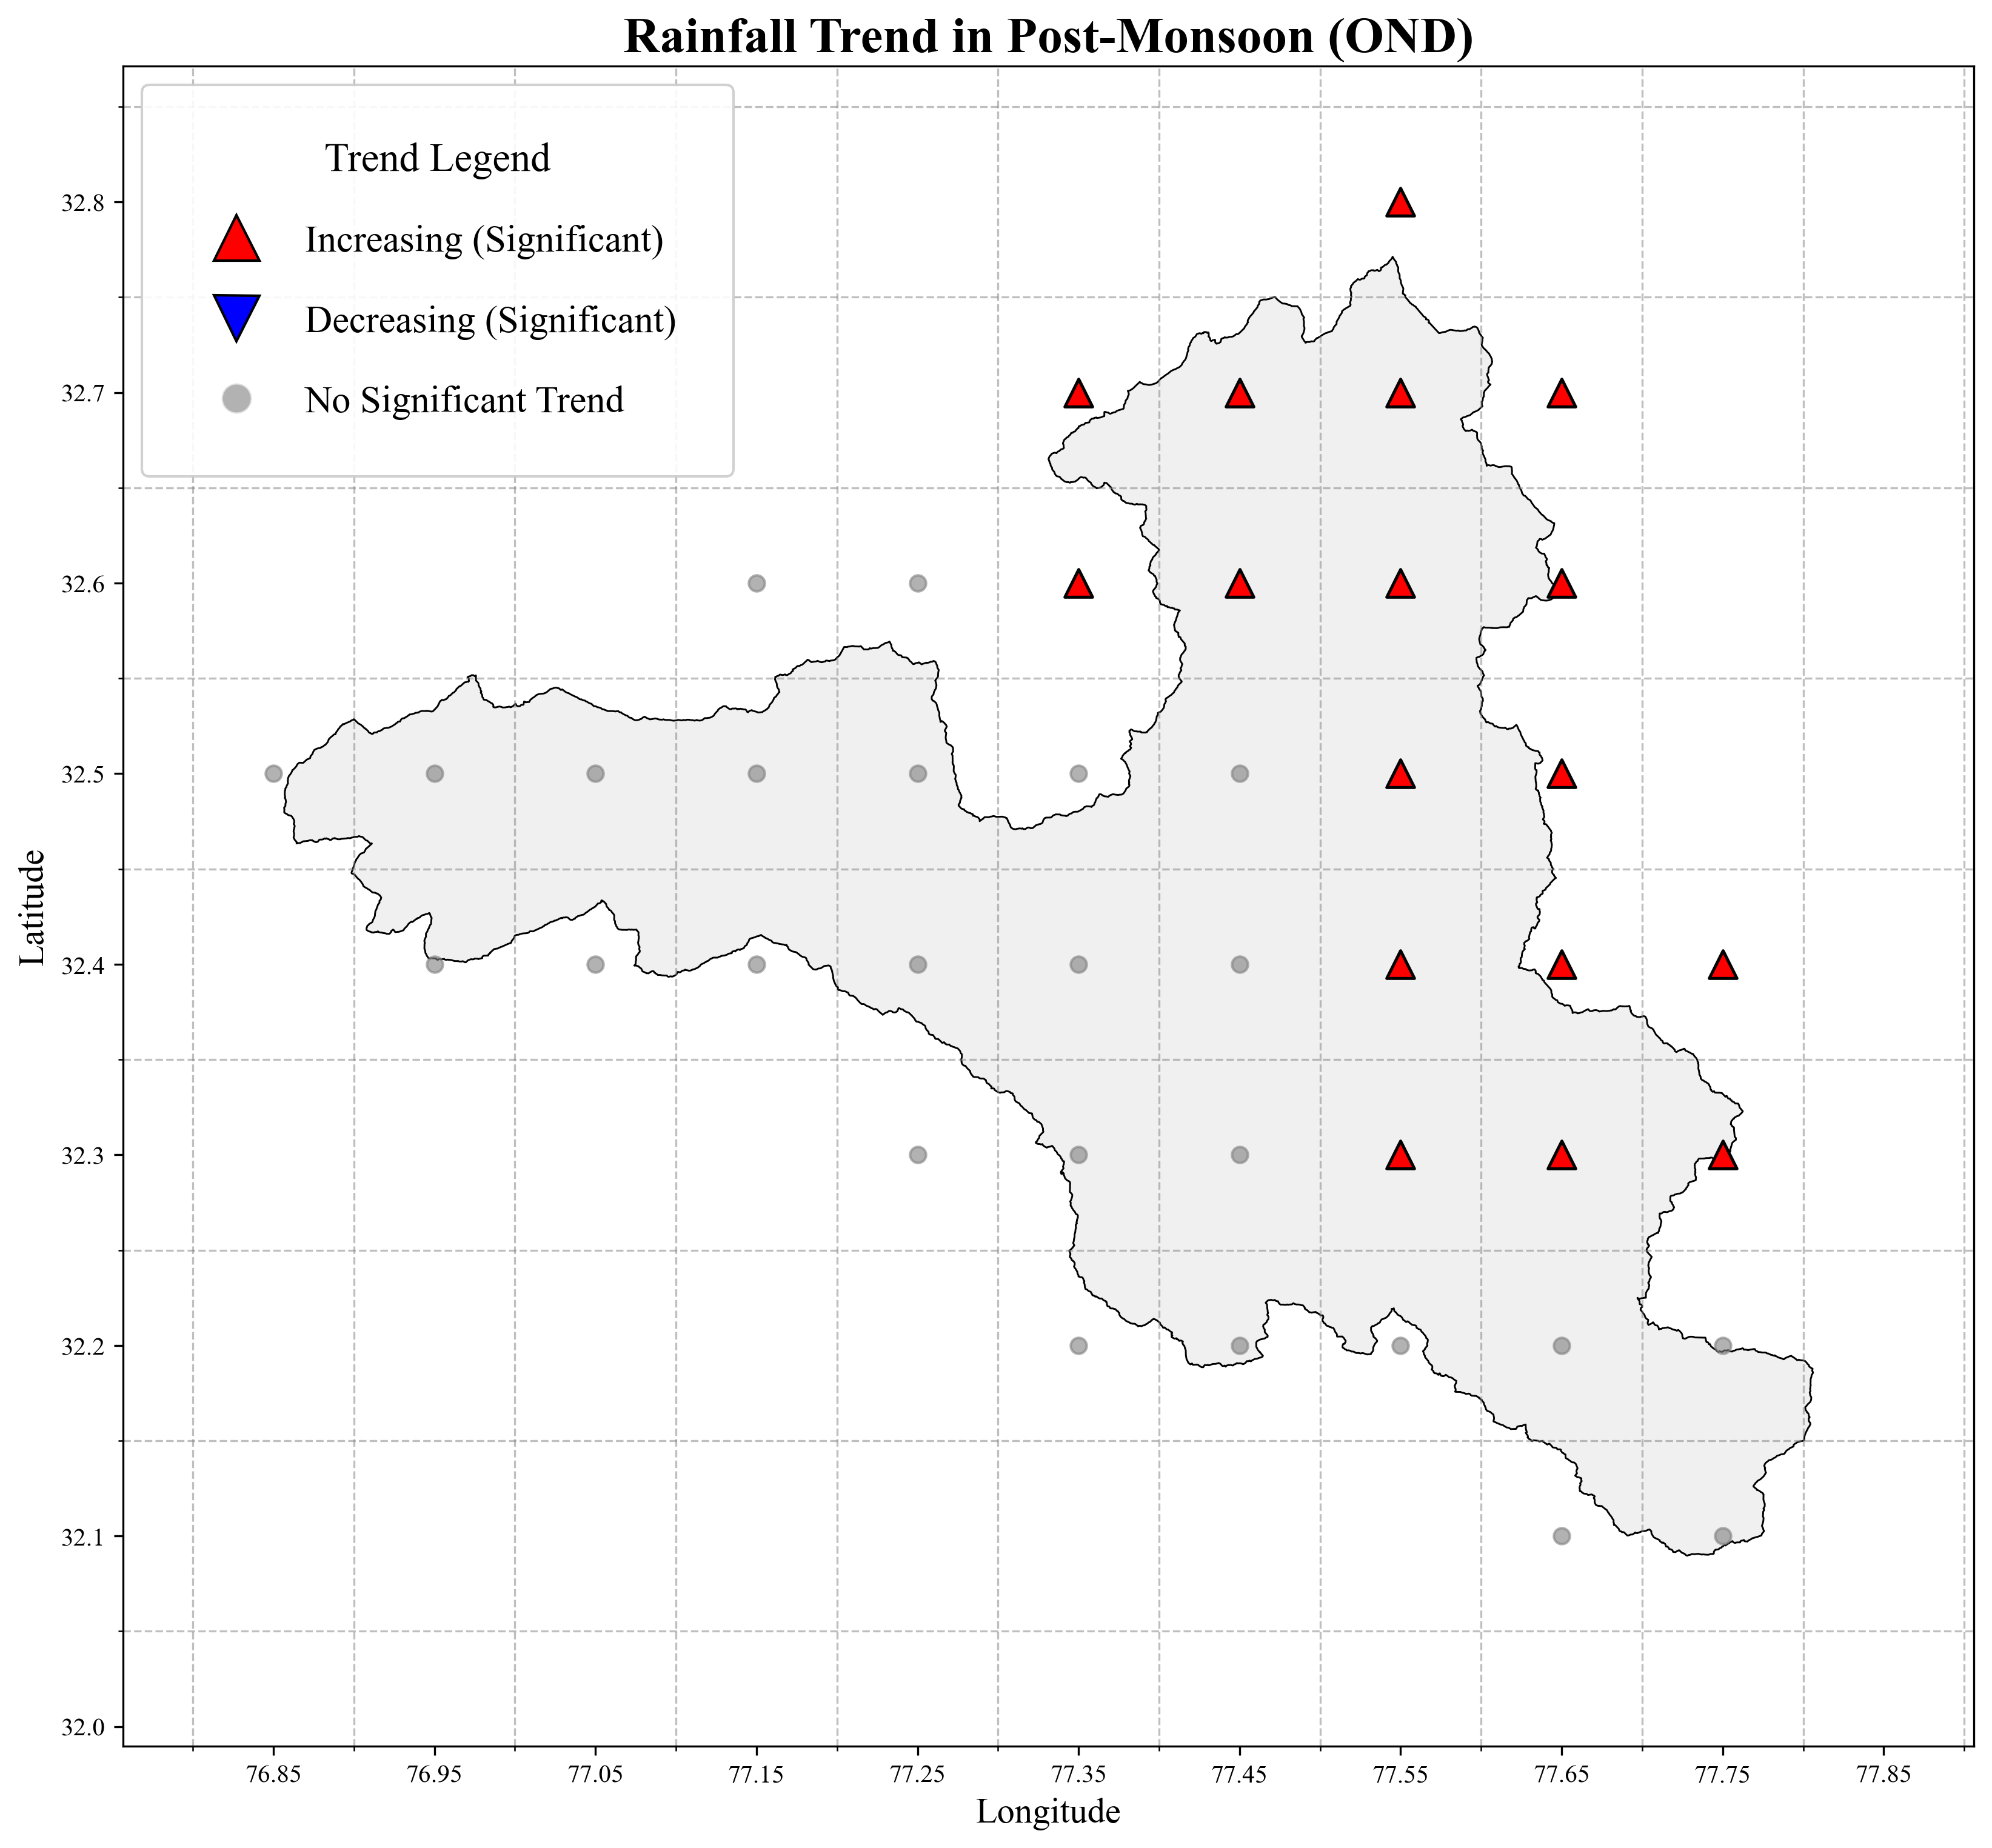


**Spatial Annual and Seasonal M-K Trend Maps of Rainfall**

**Fig. S4** Spatial Trend Analysis of Snowfall. **S4a** – Spatial trend of annual snowfall **S4b** – Spatial trend of winter snowfall **S4c** – Spatial trend of pre-monsoon snowfall **S4d** – Spatial trend of monsoon snowfall **S4e** – Spatial trend of post-monsoon snowfall


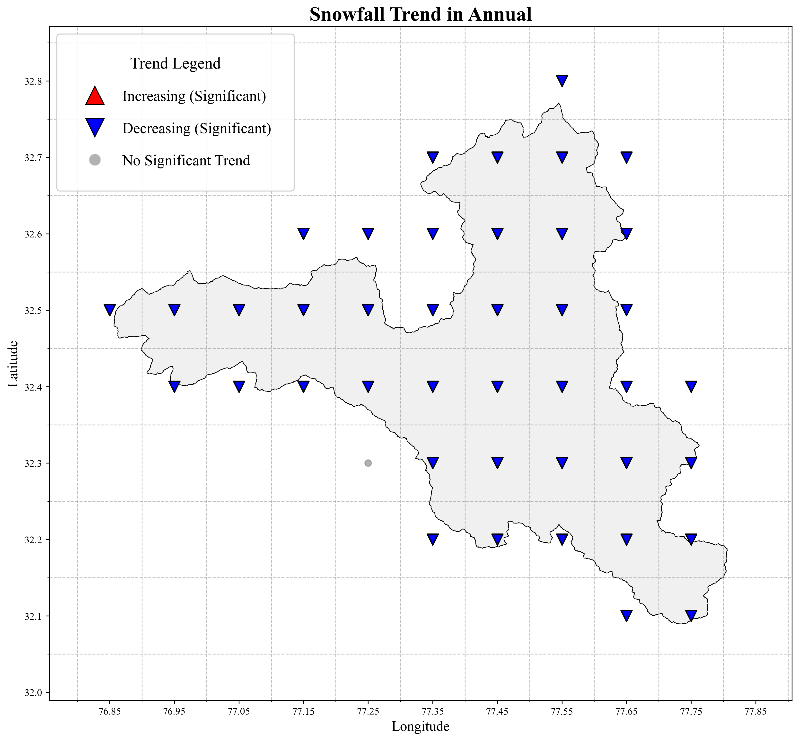

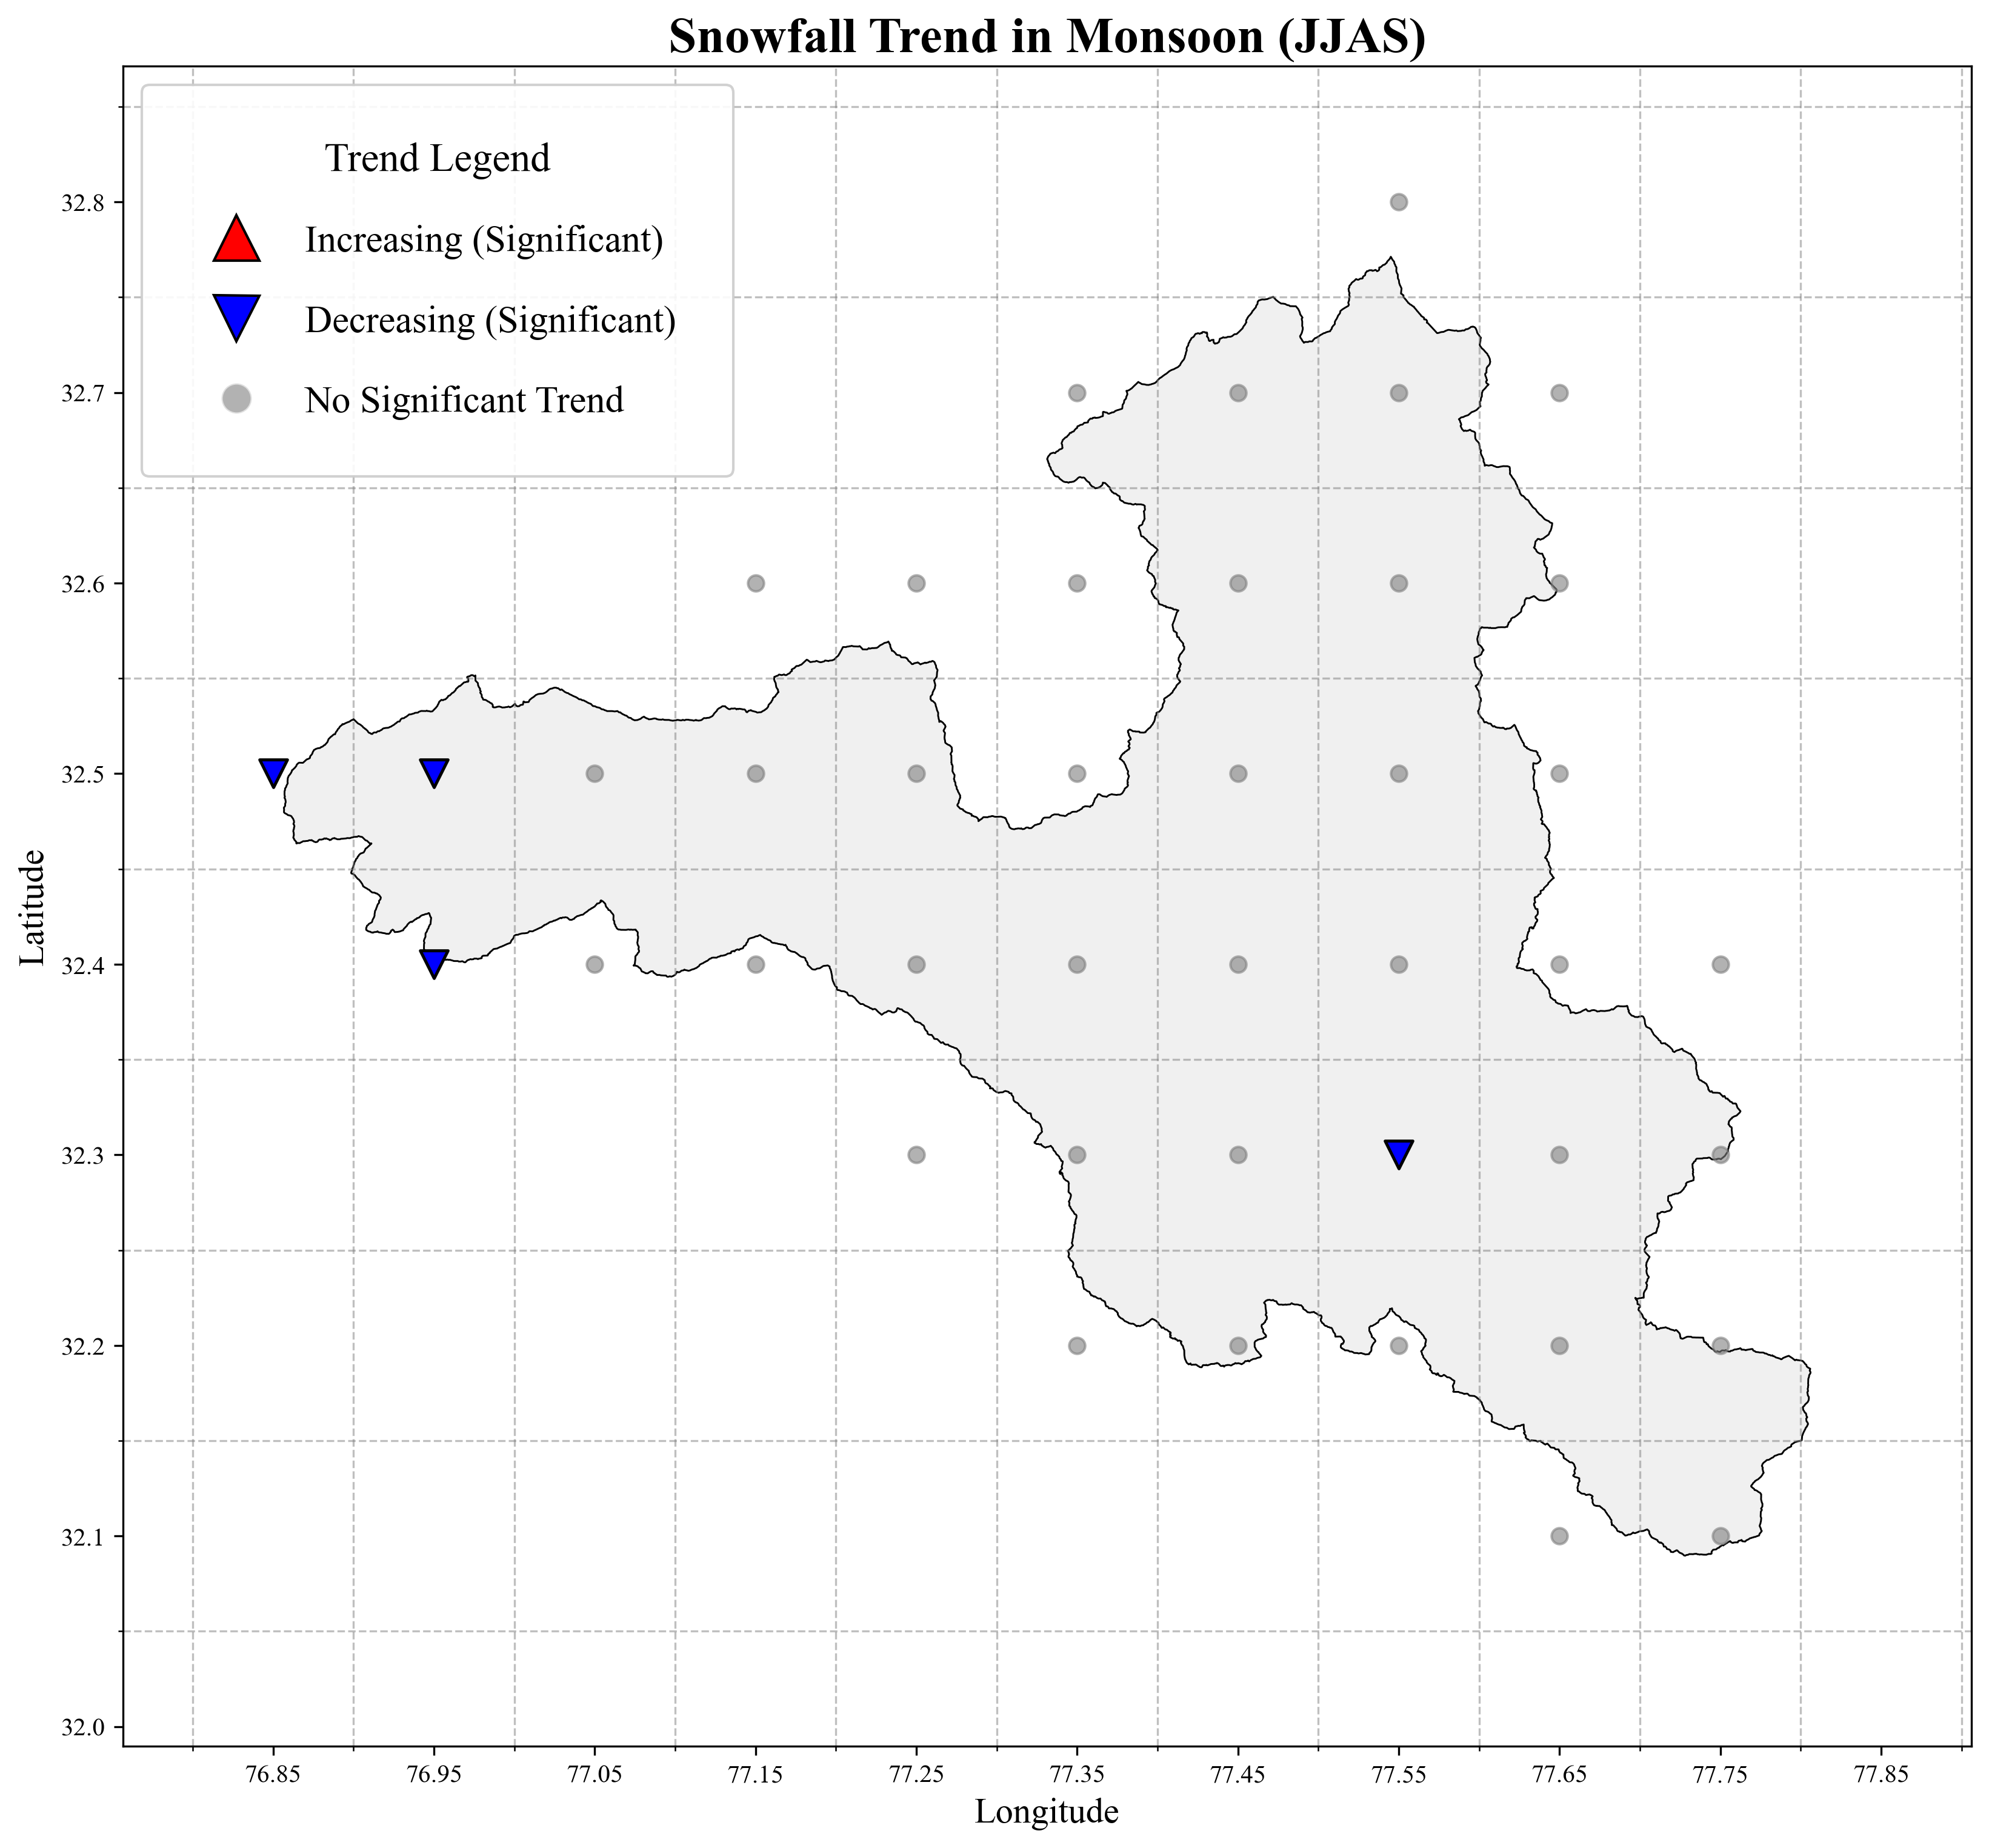

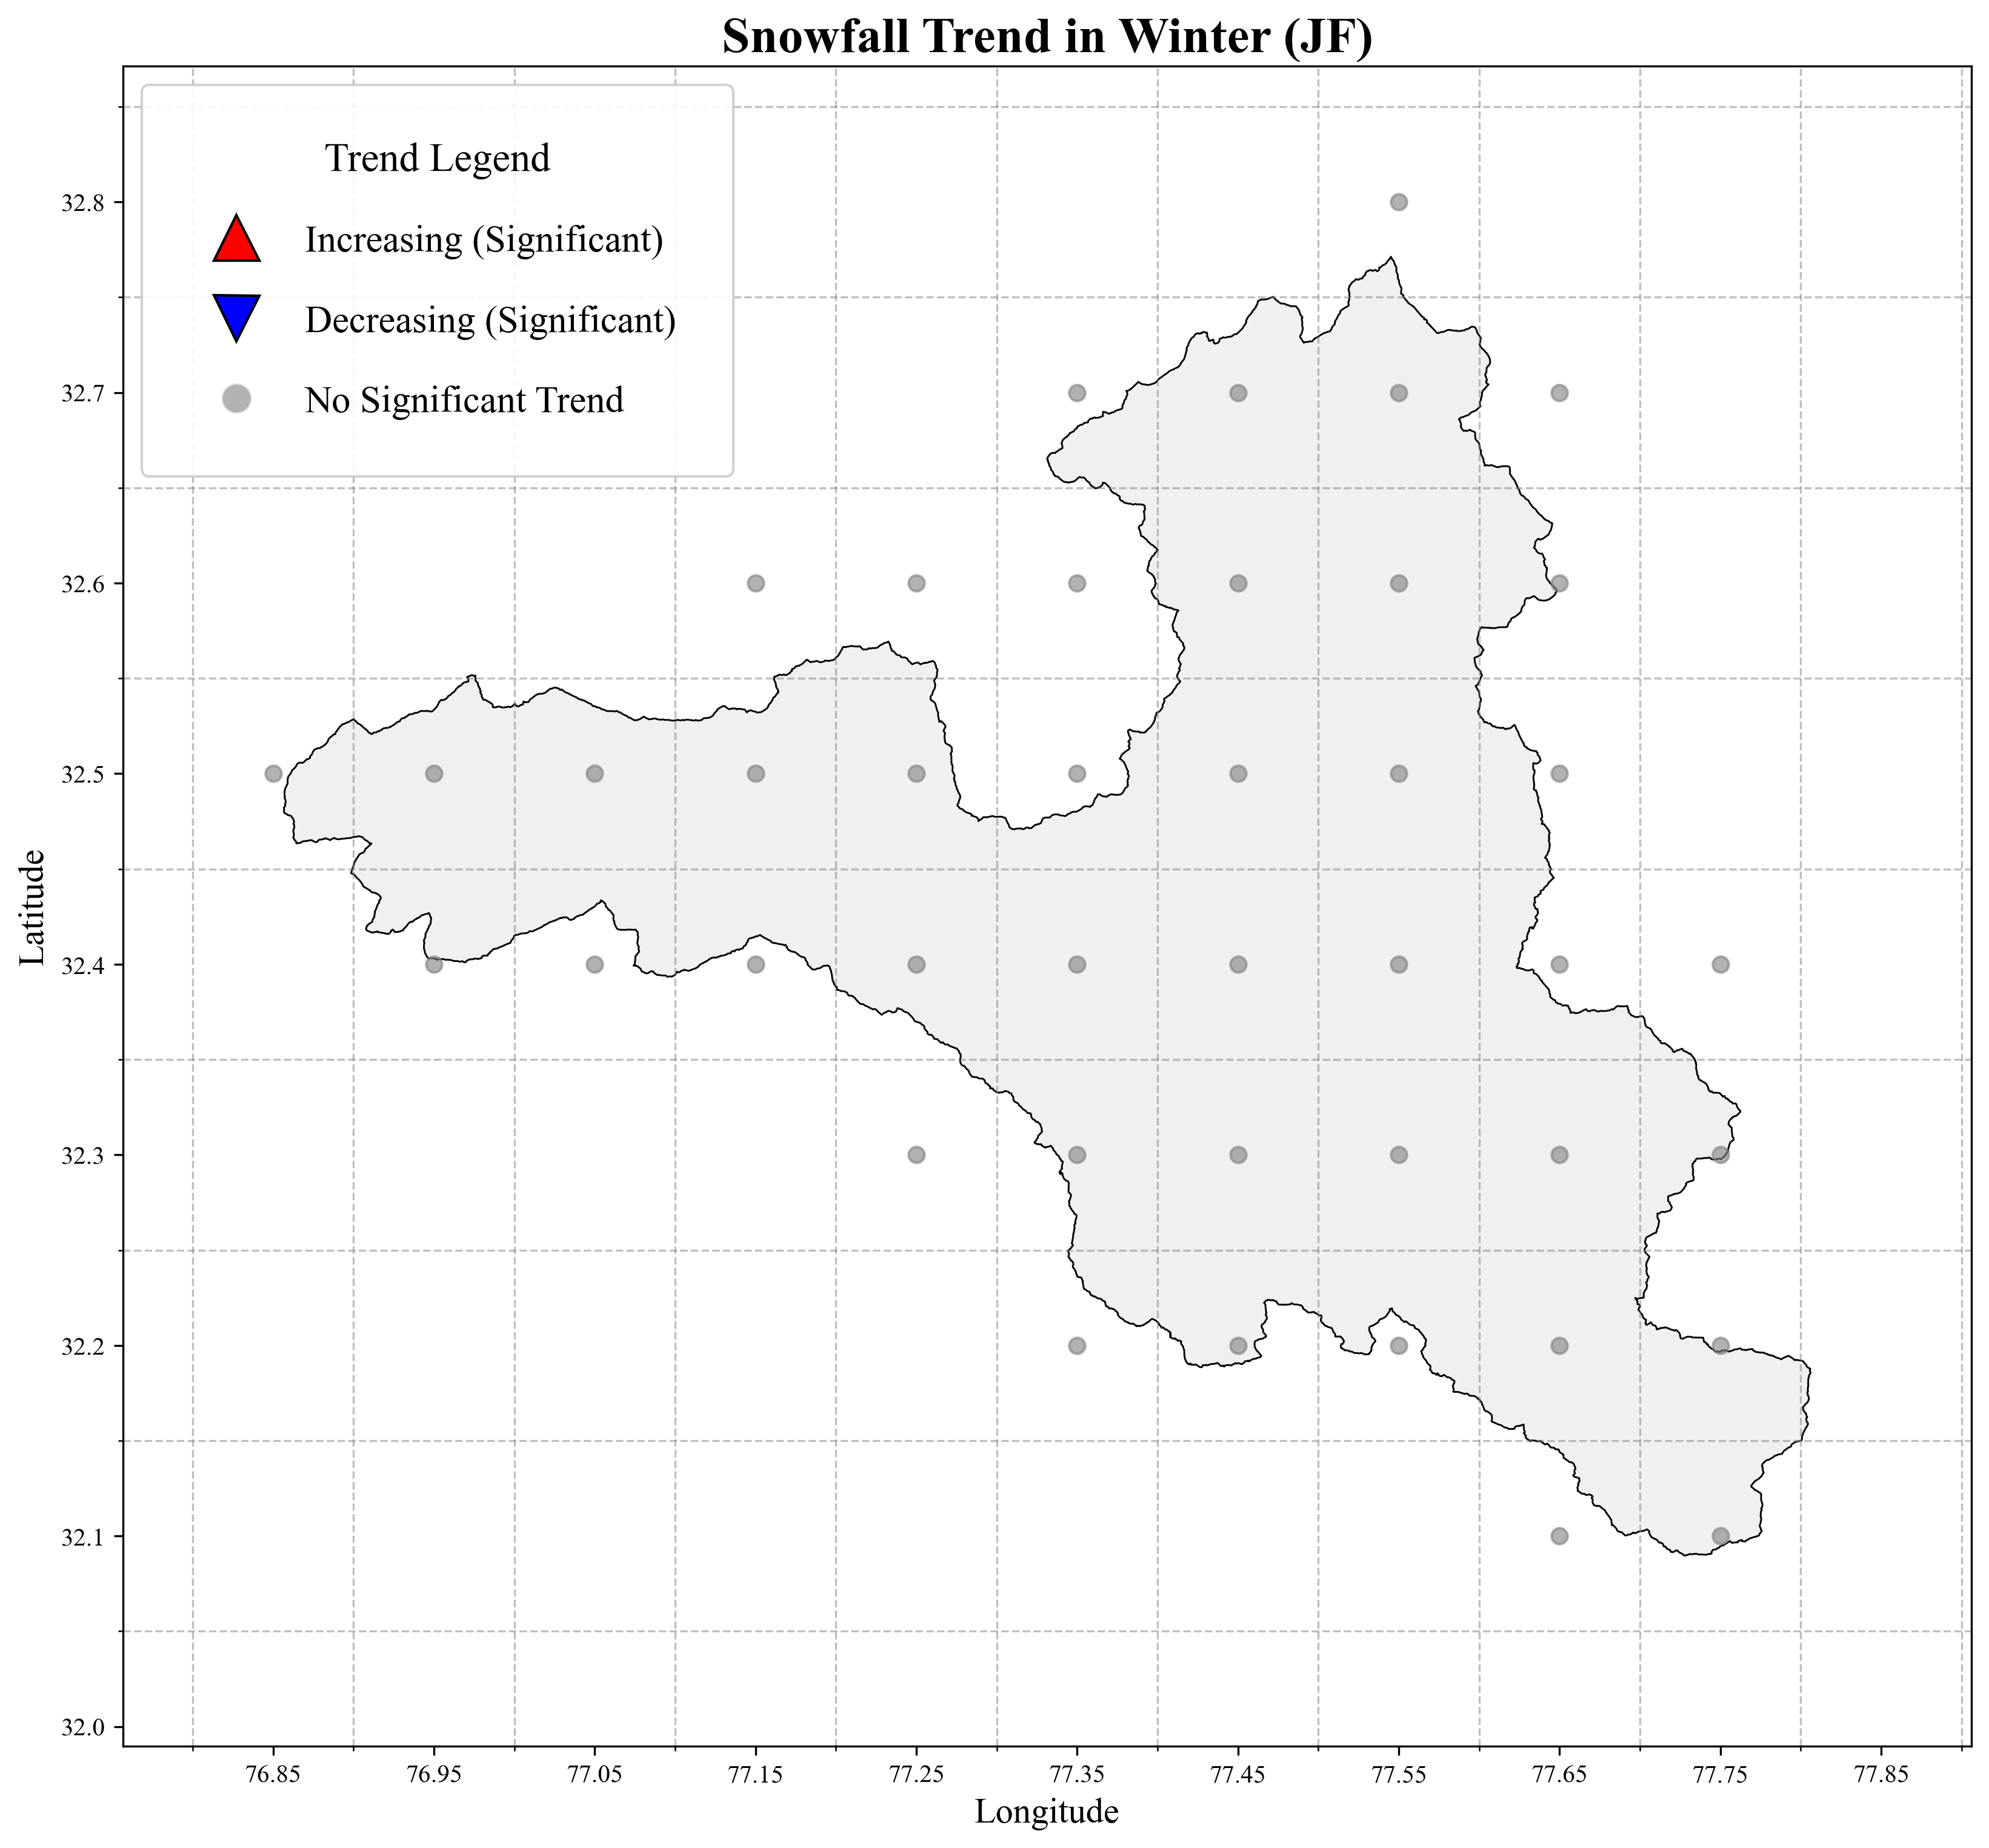

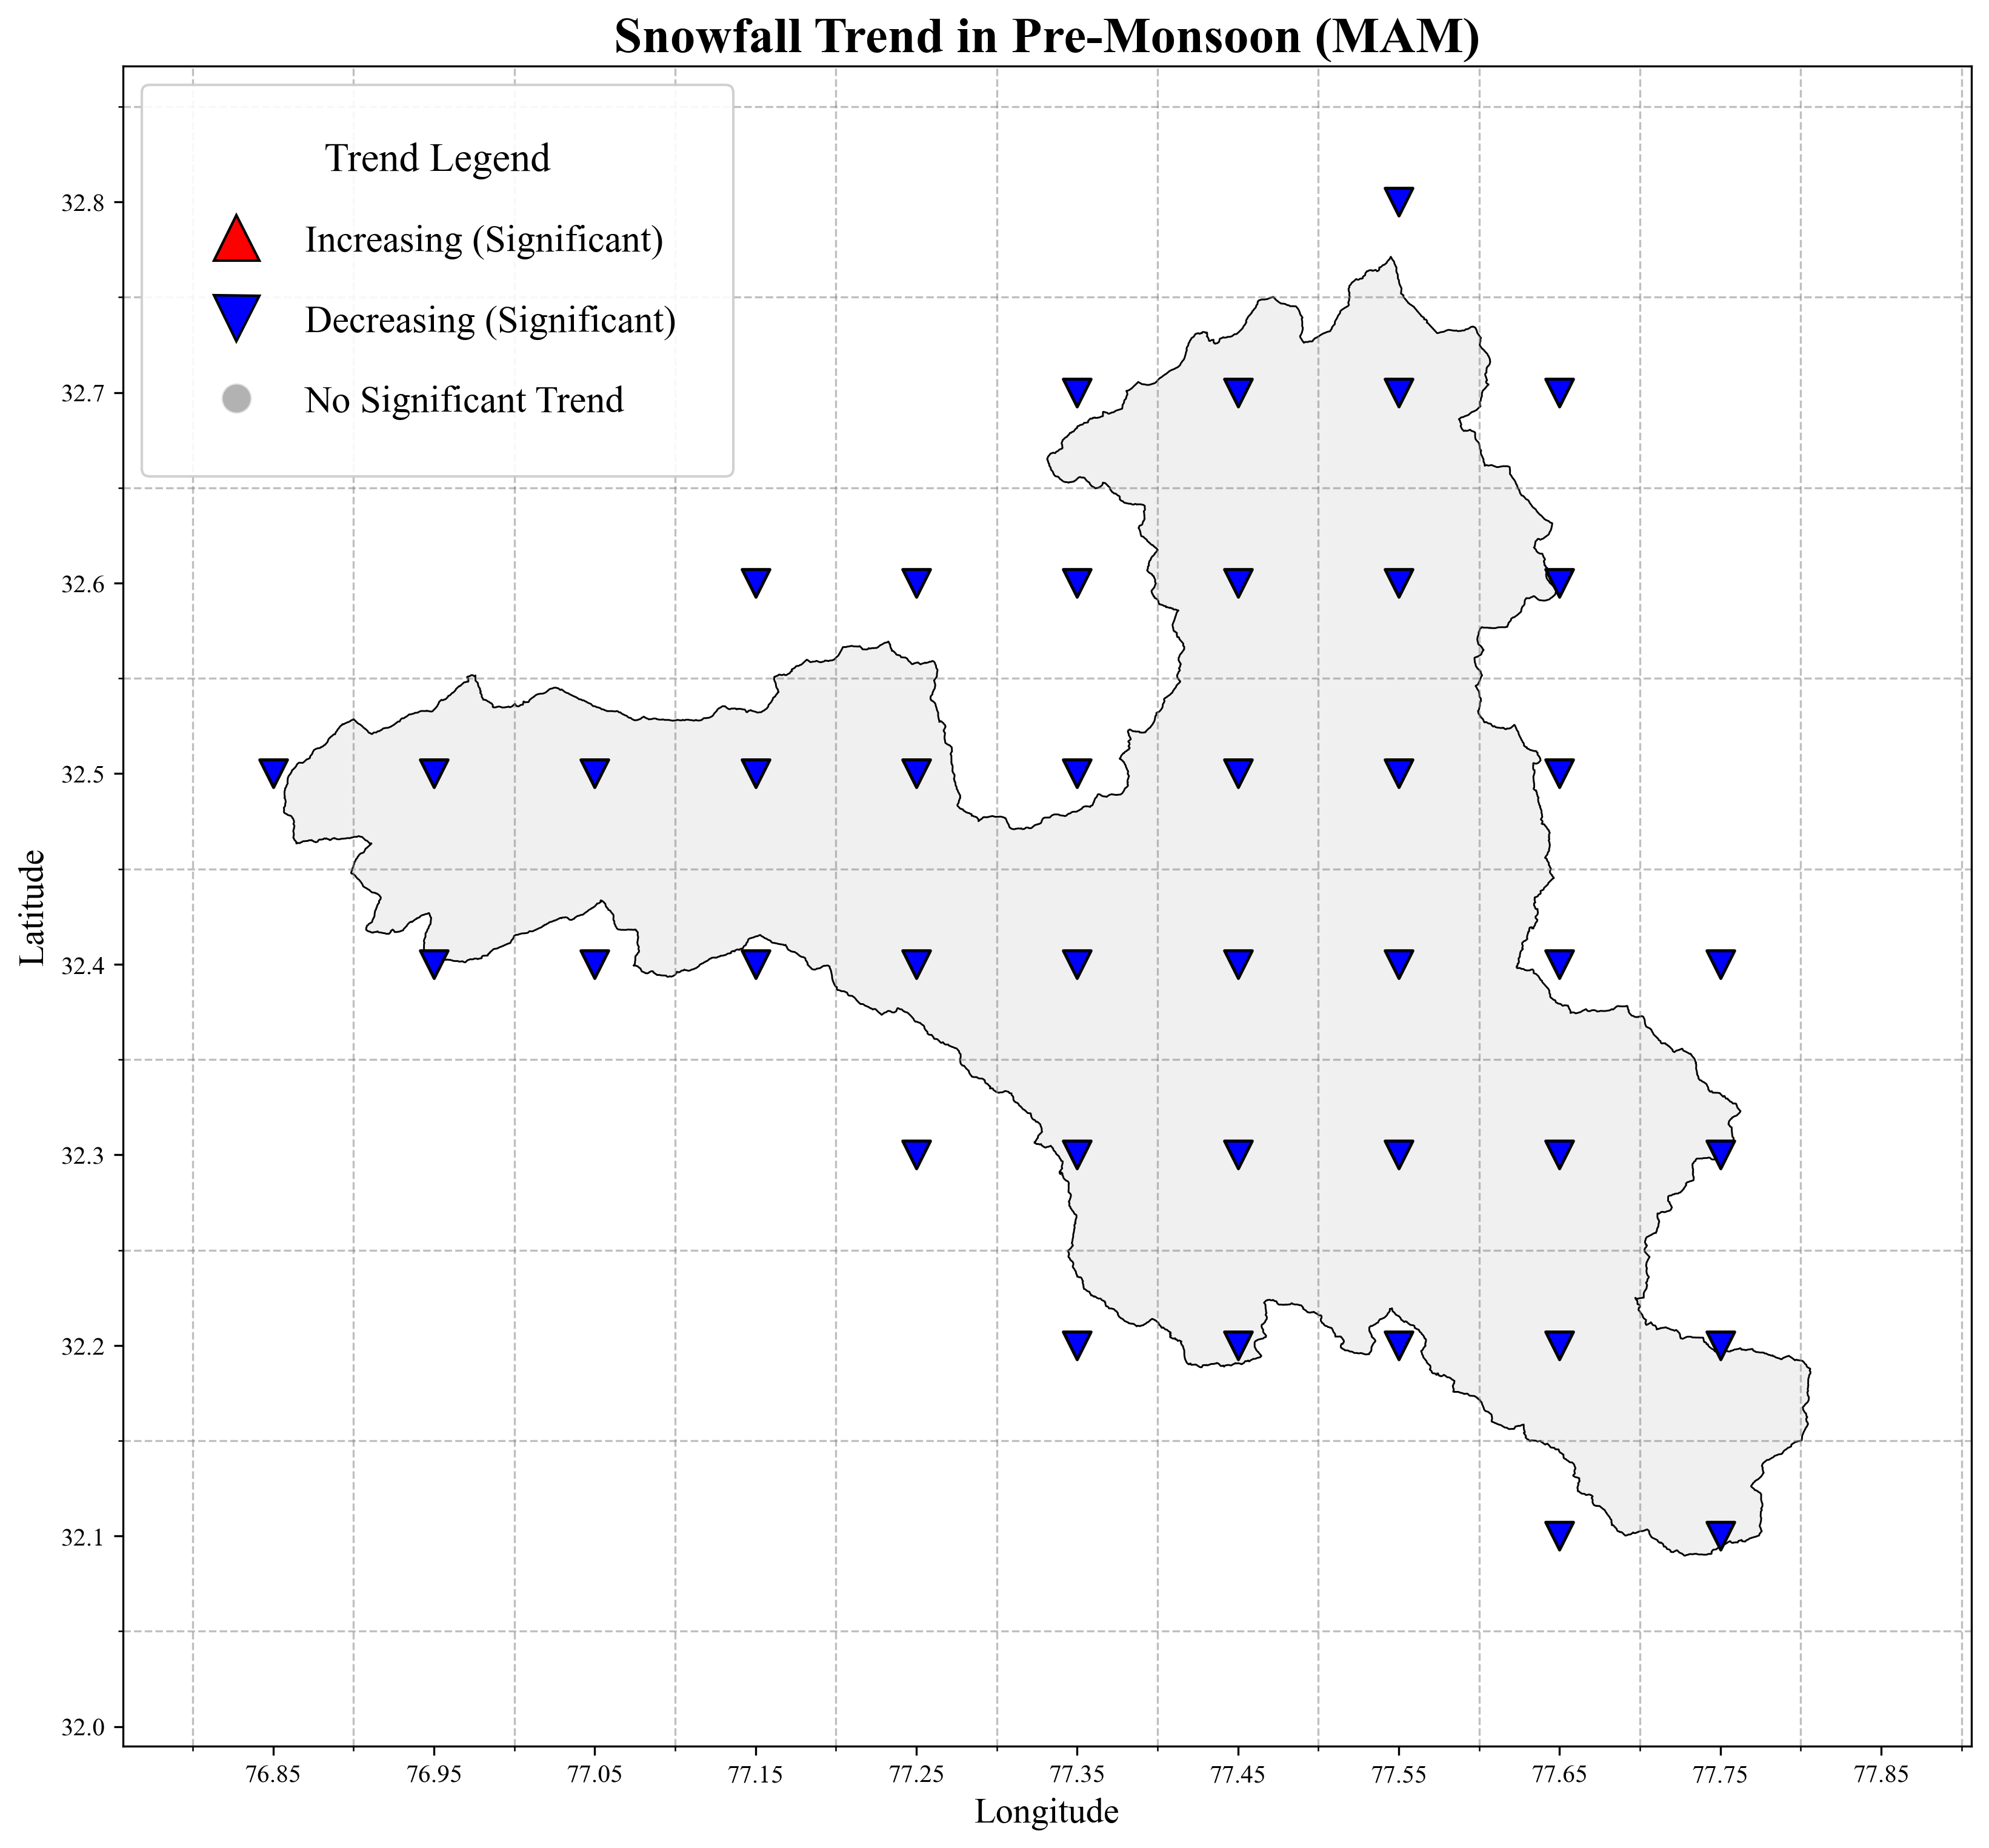

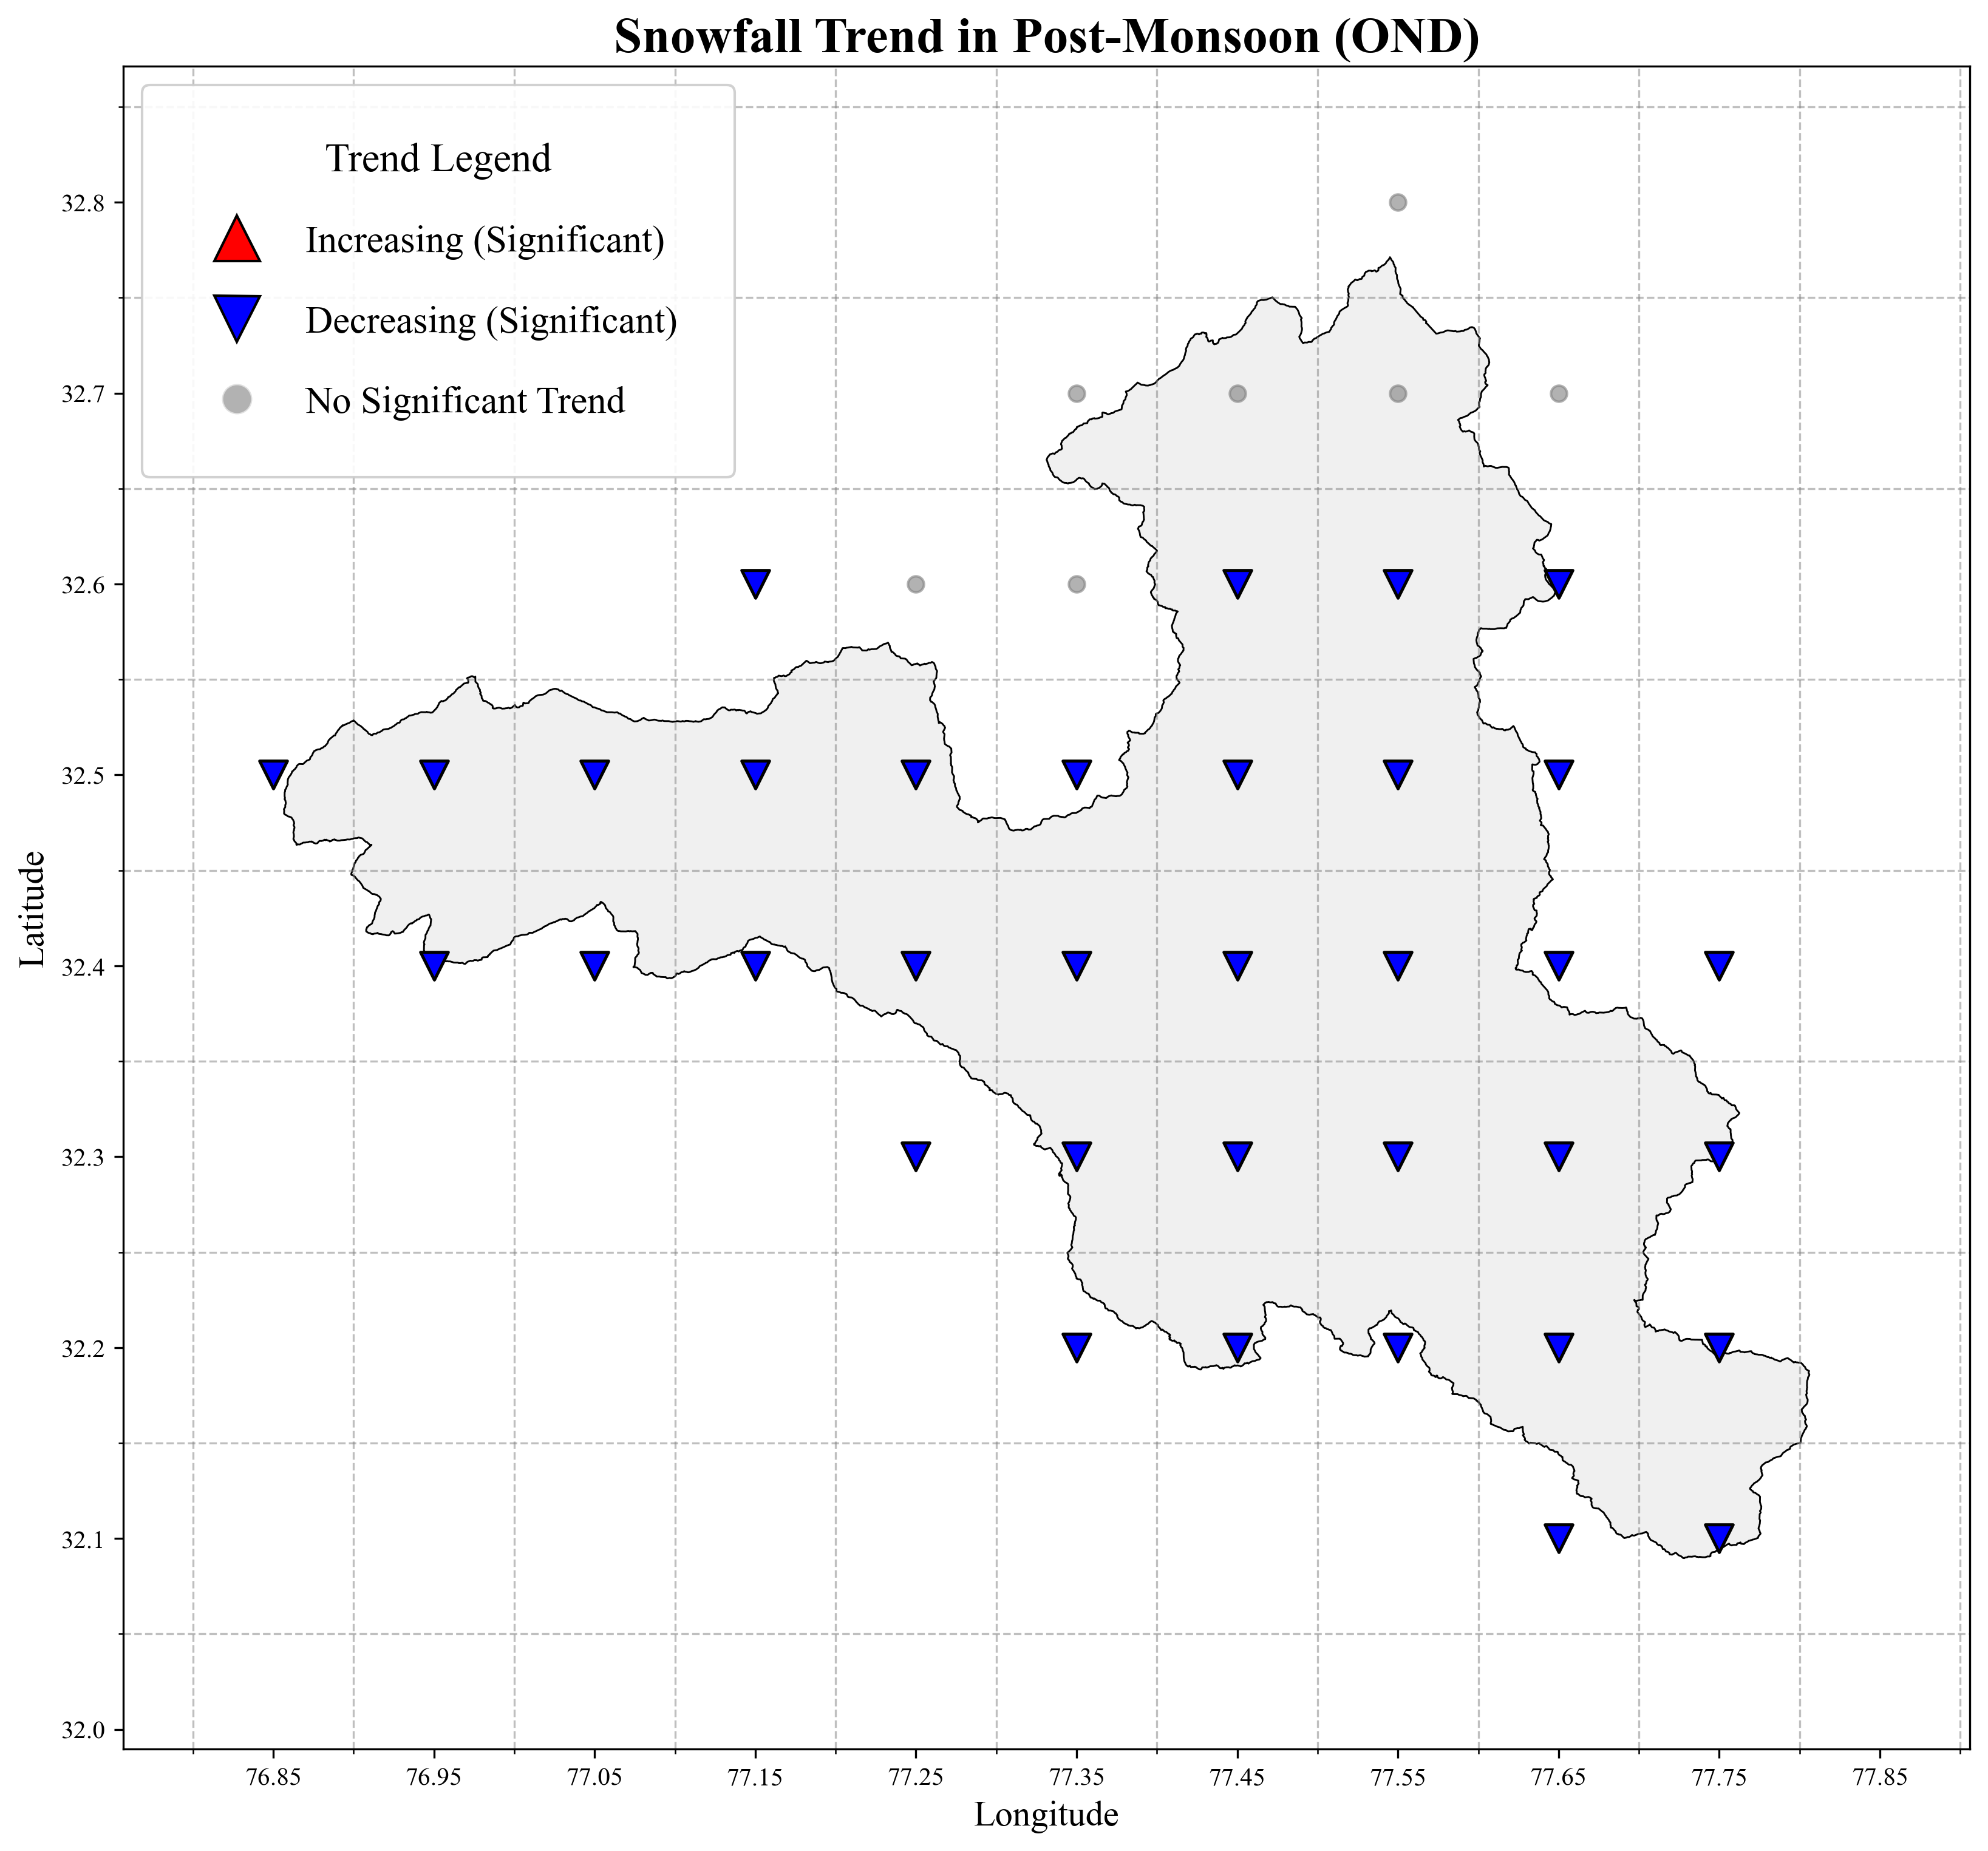


**Spatial Annual and Seasonal M-K Trend Maps of Snowfall**

**Fig. S5** Spatial Trend Analysis of Snow depth. **S5a** – Spatial trend of annual snow depth. **S5b** – Spatial trend of winter snow depth. **S5c** – Spatial trend of pre-monsoon snow depth. **S5d** – Spatial trend of monsoon snow depth. **S5e** – Spatial trend of post-monsoon snow depth


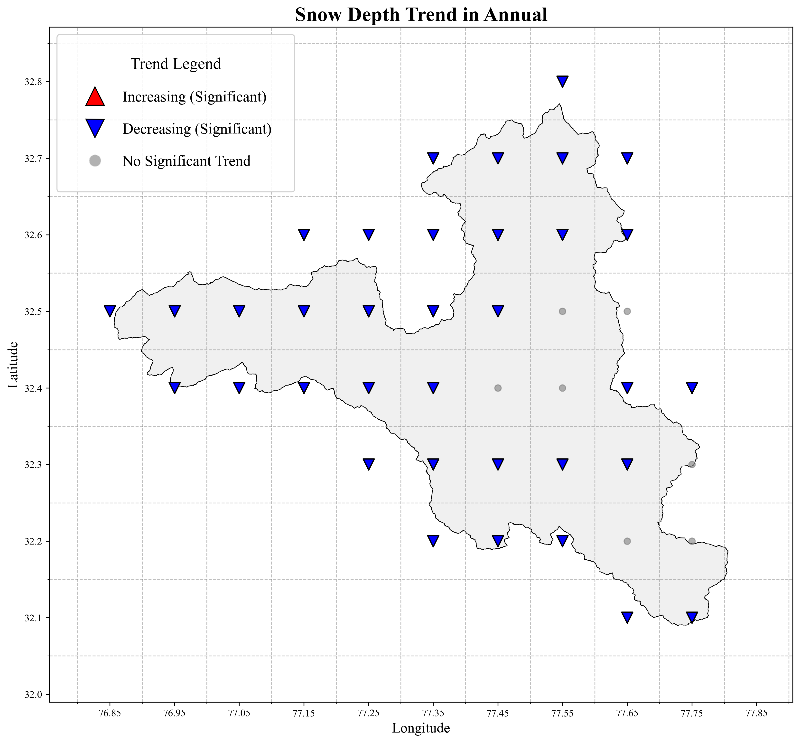

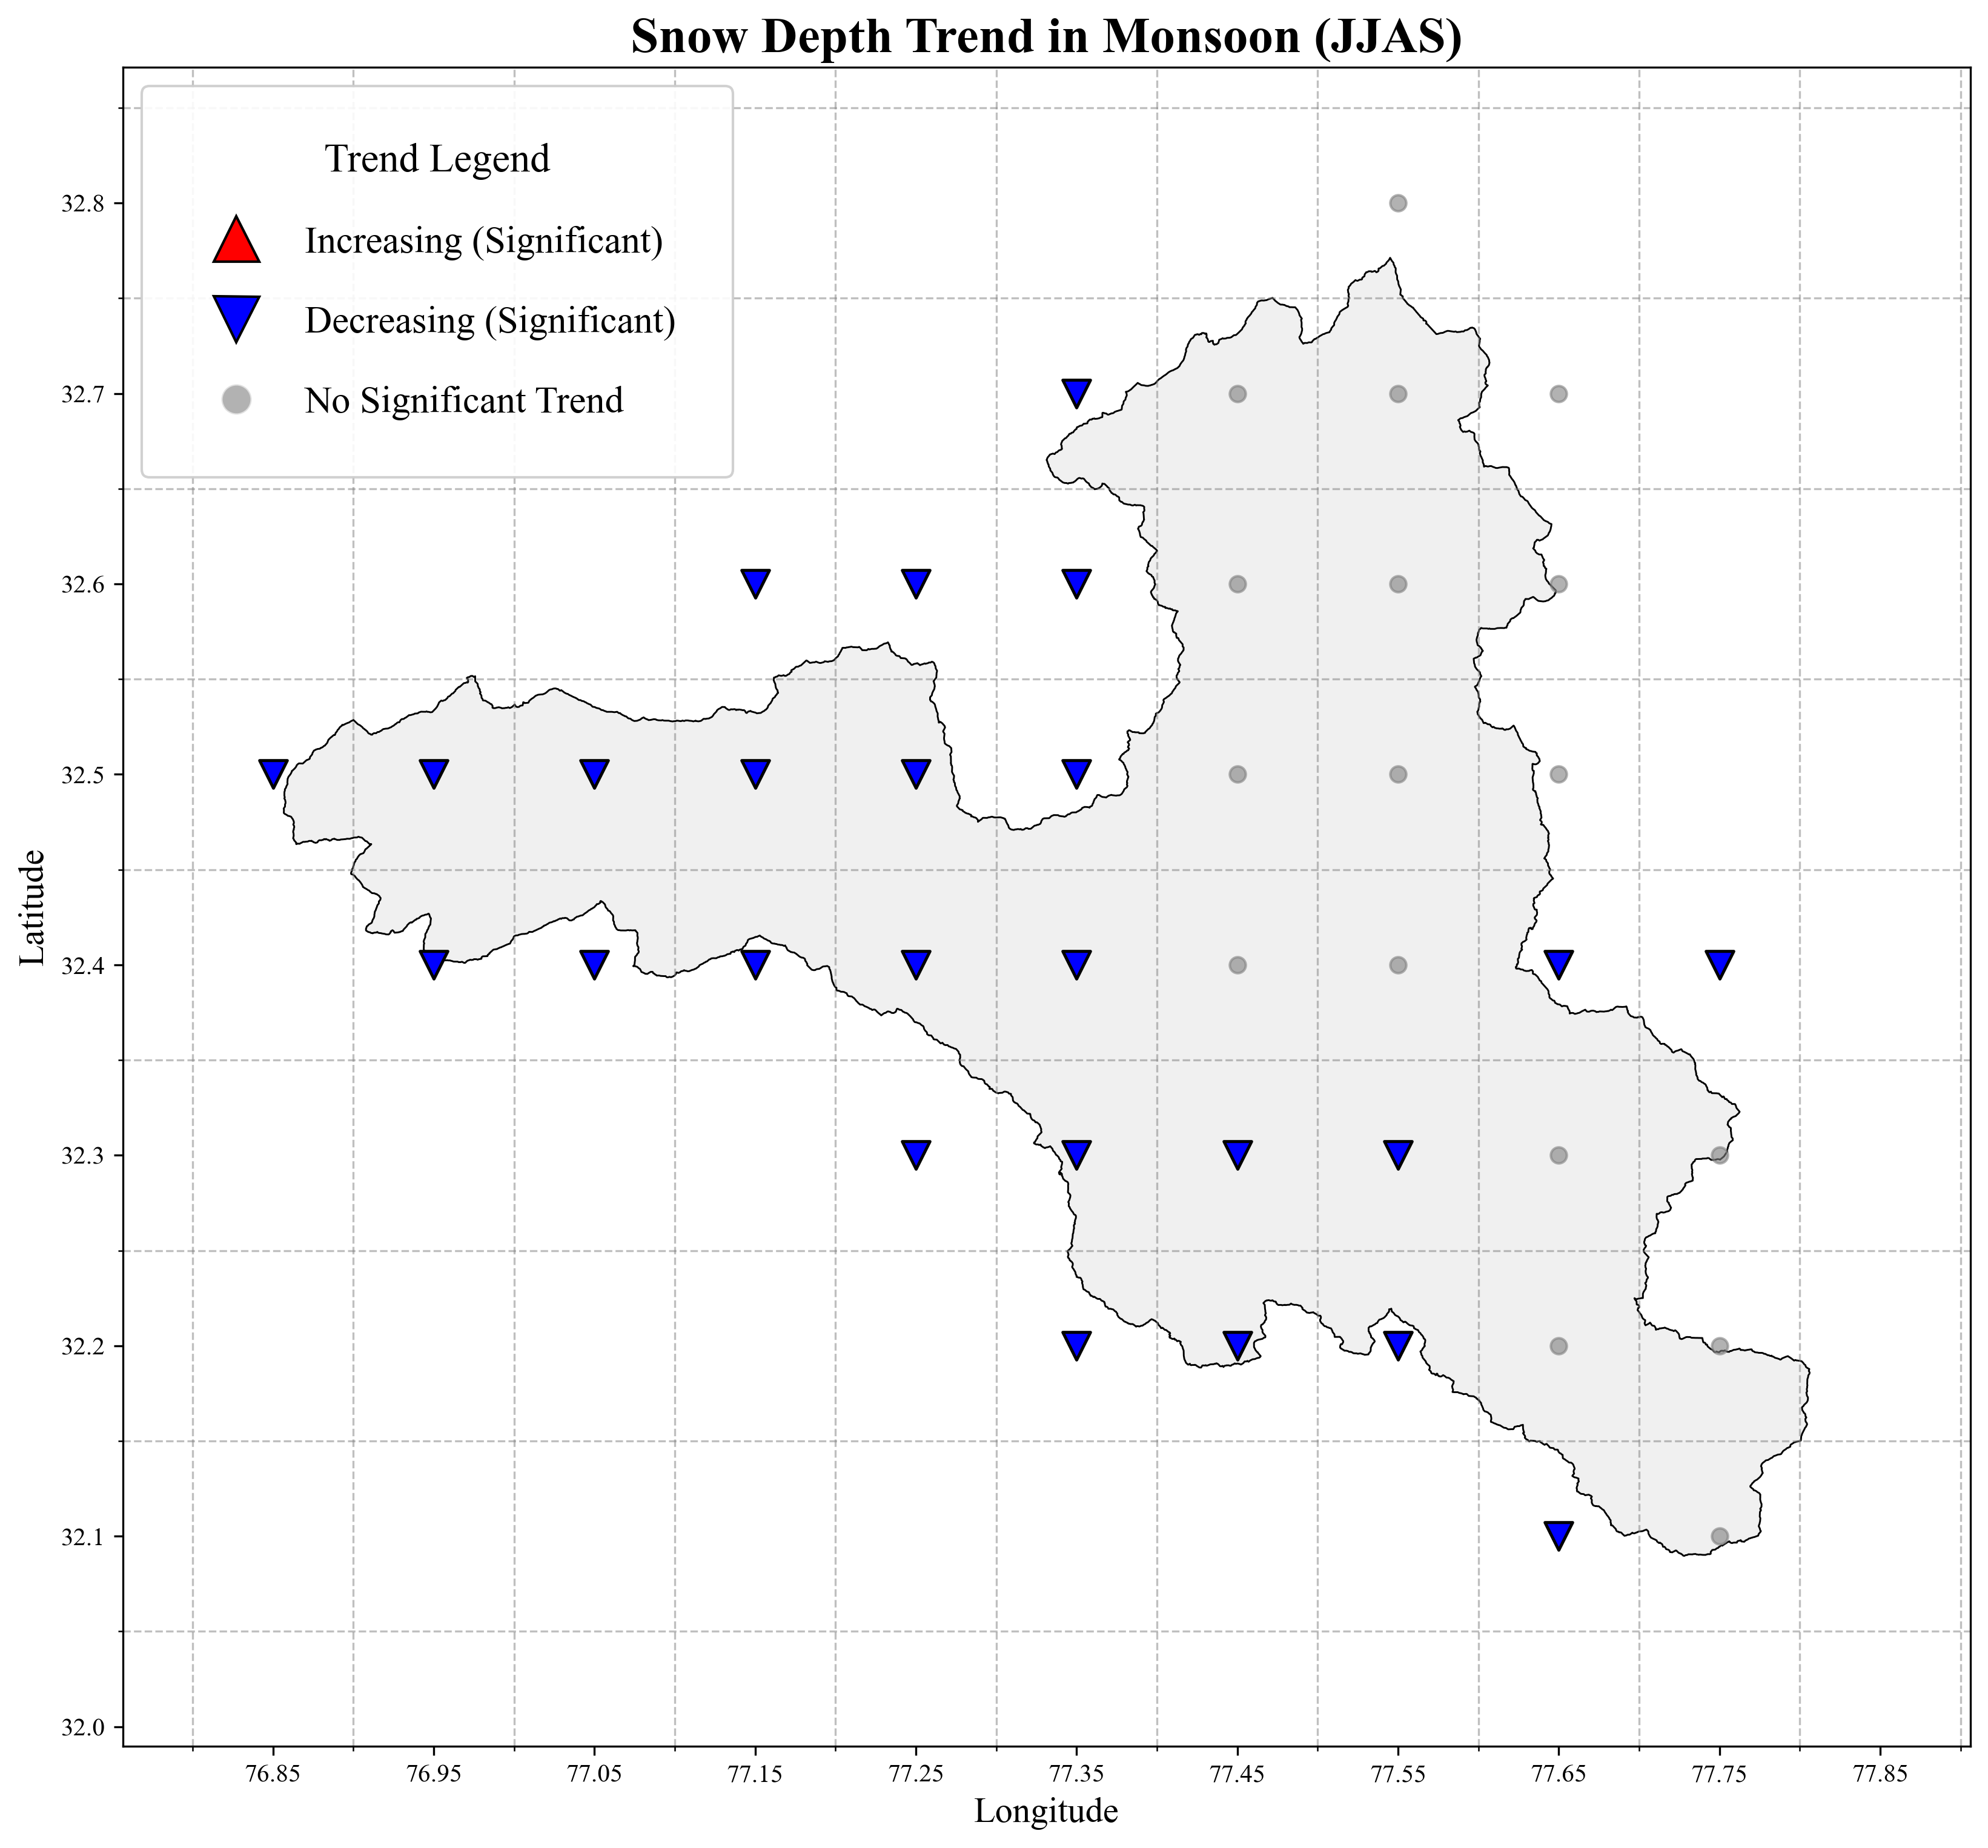

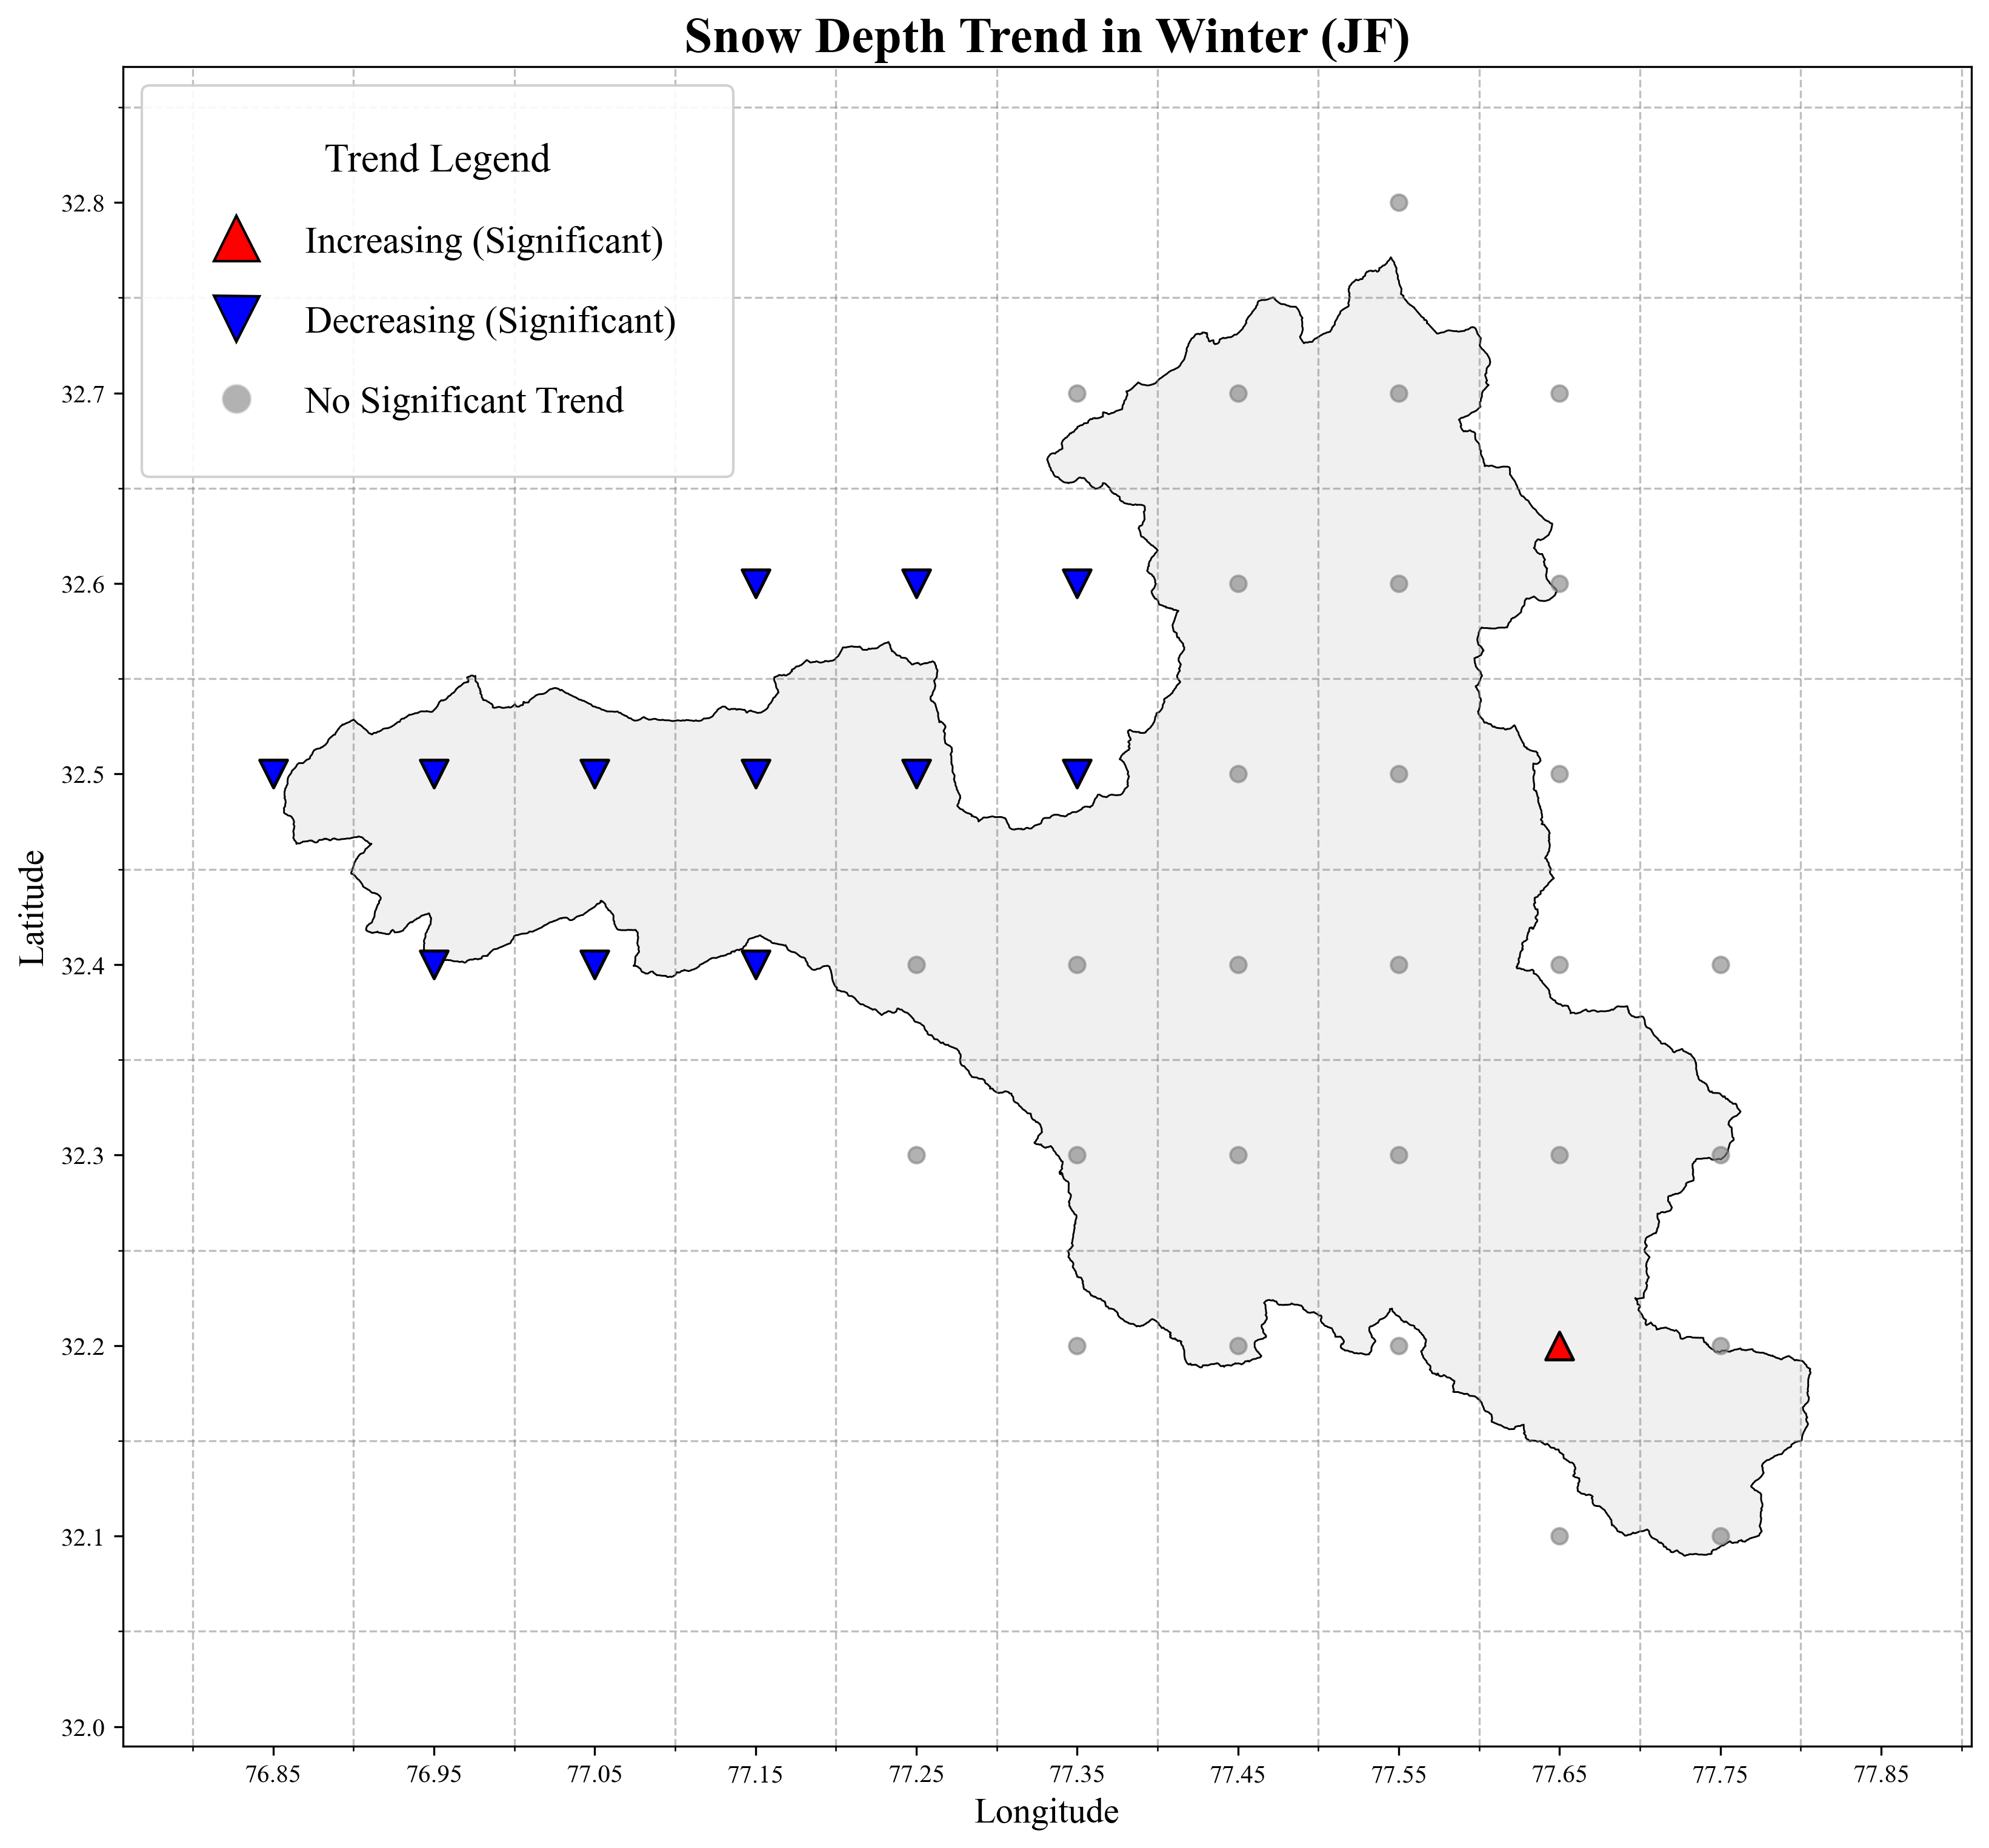

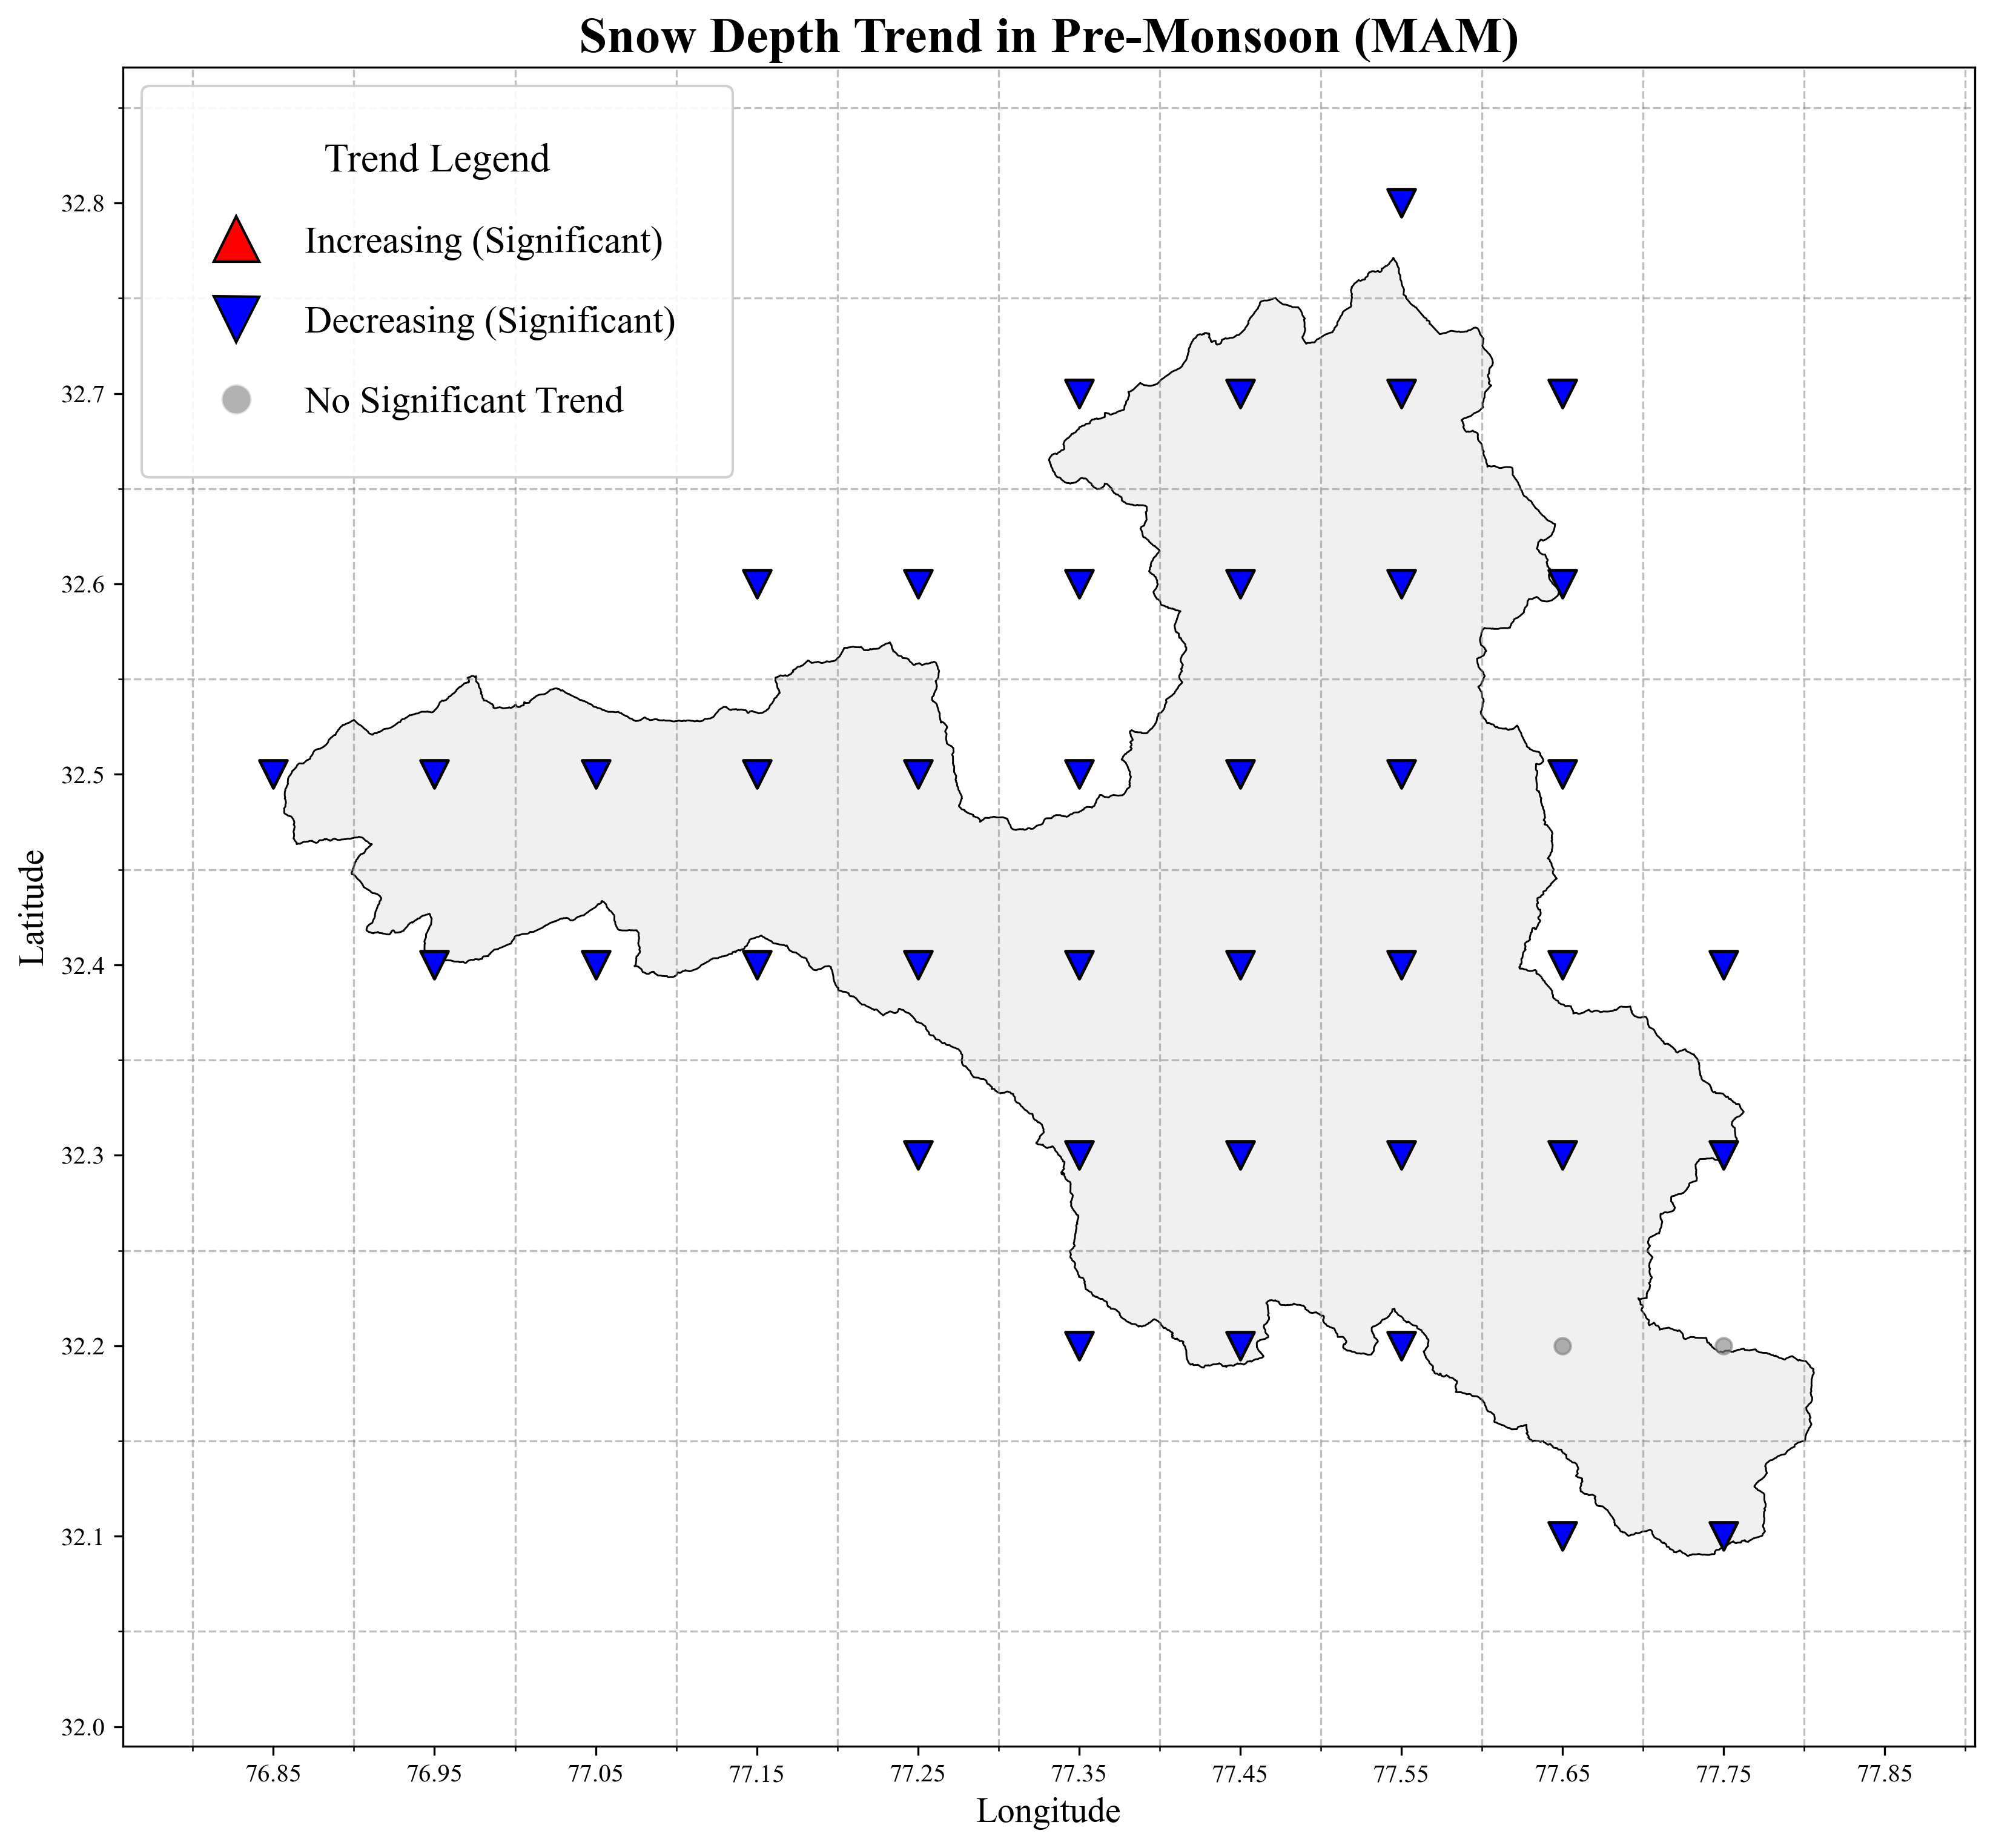

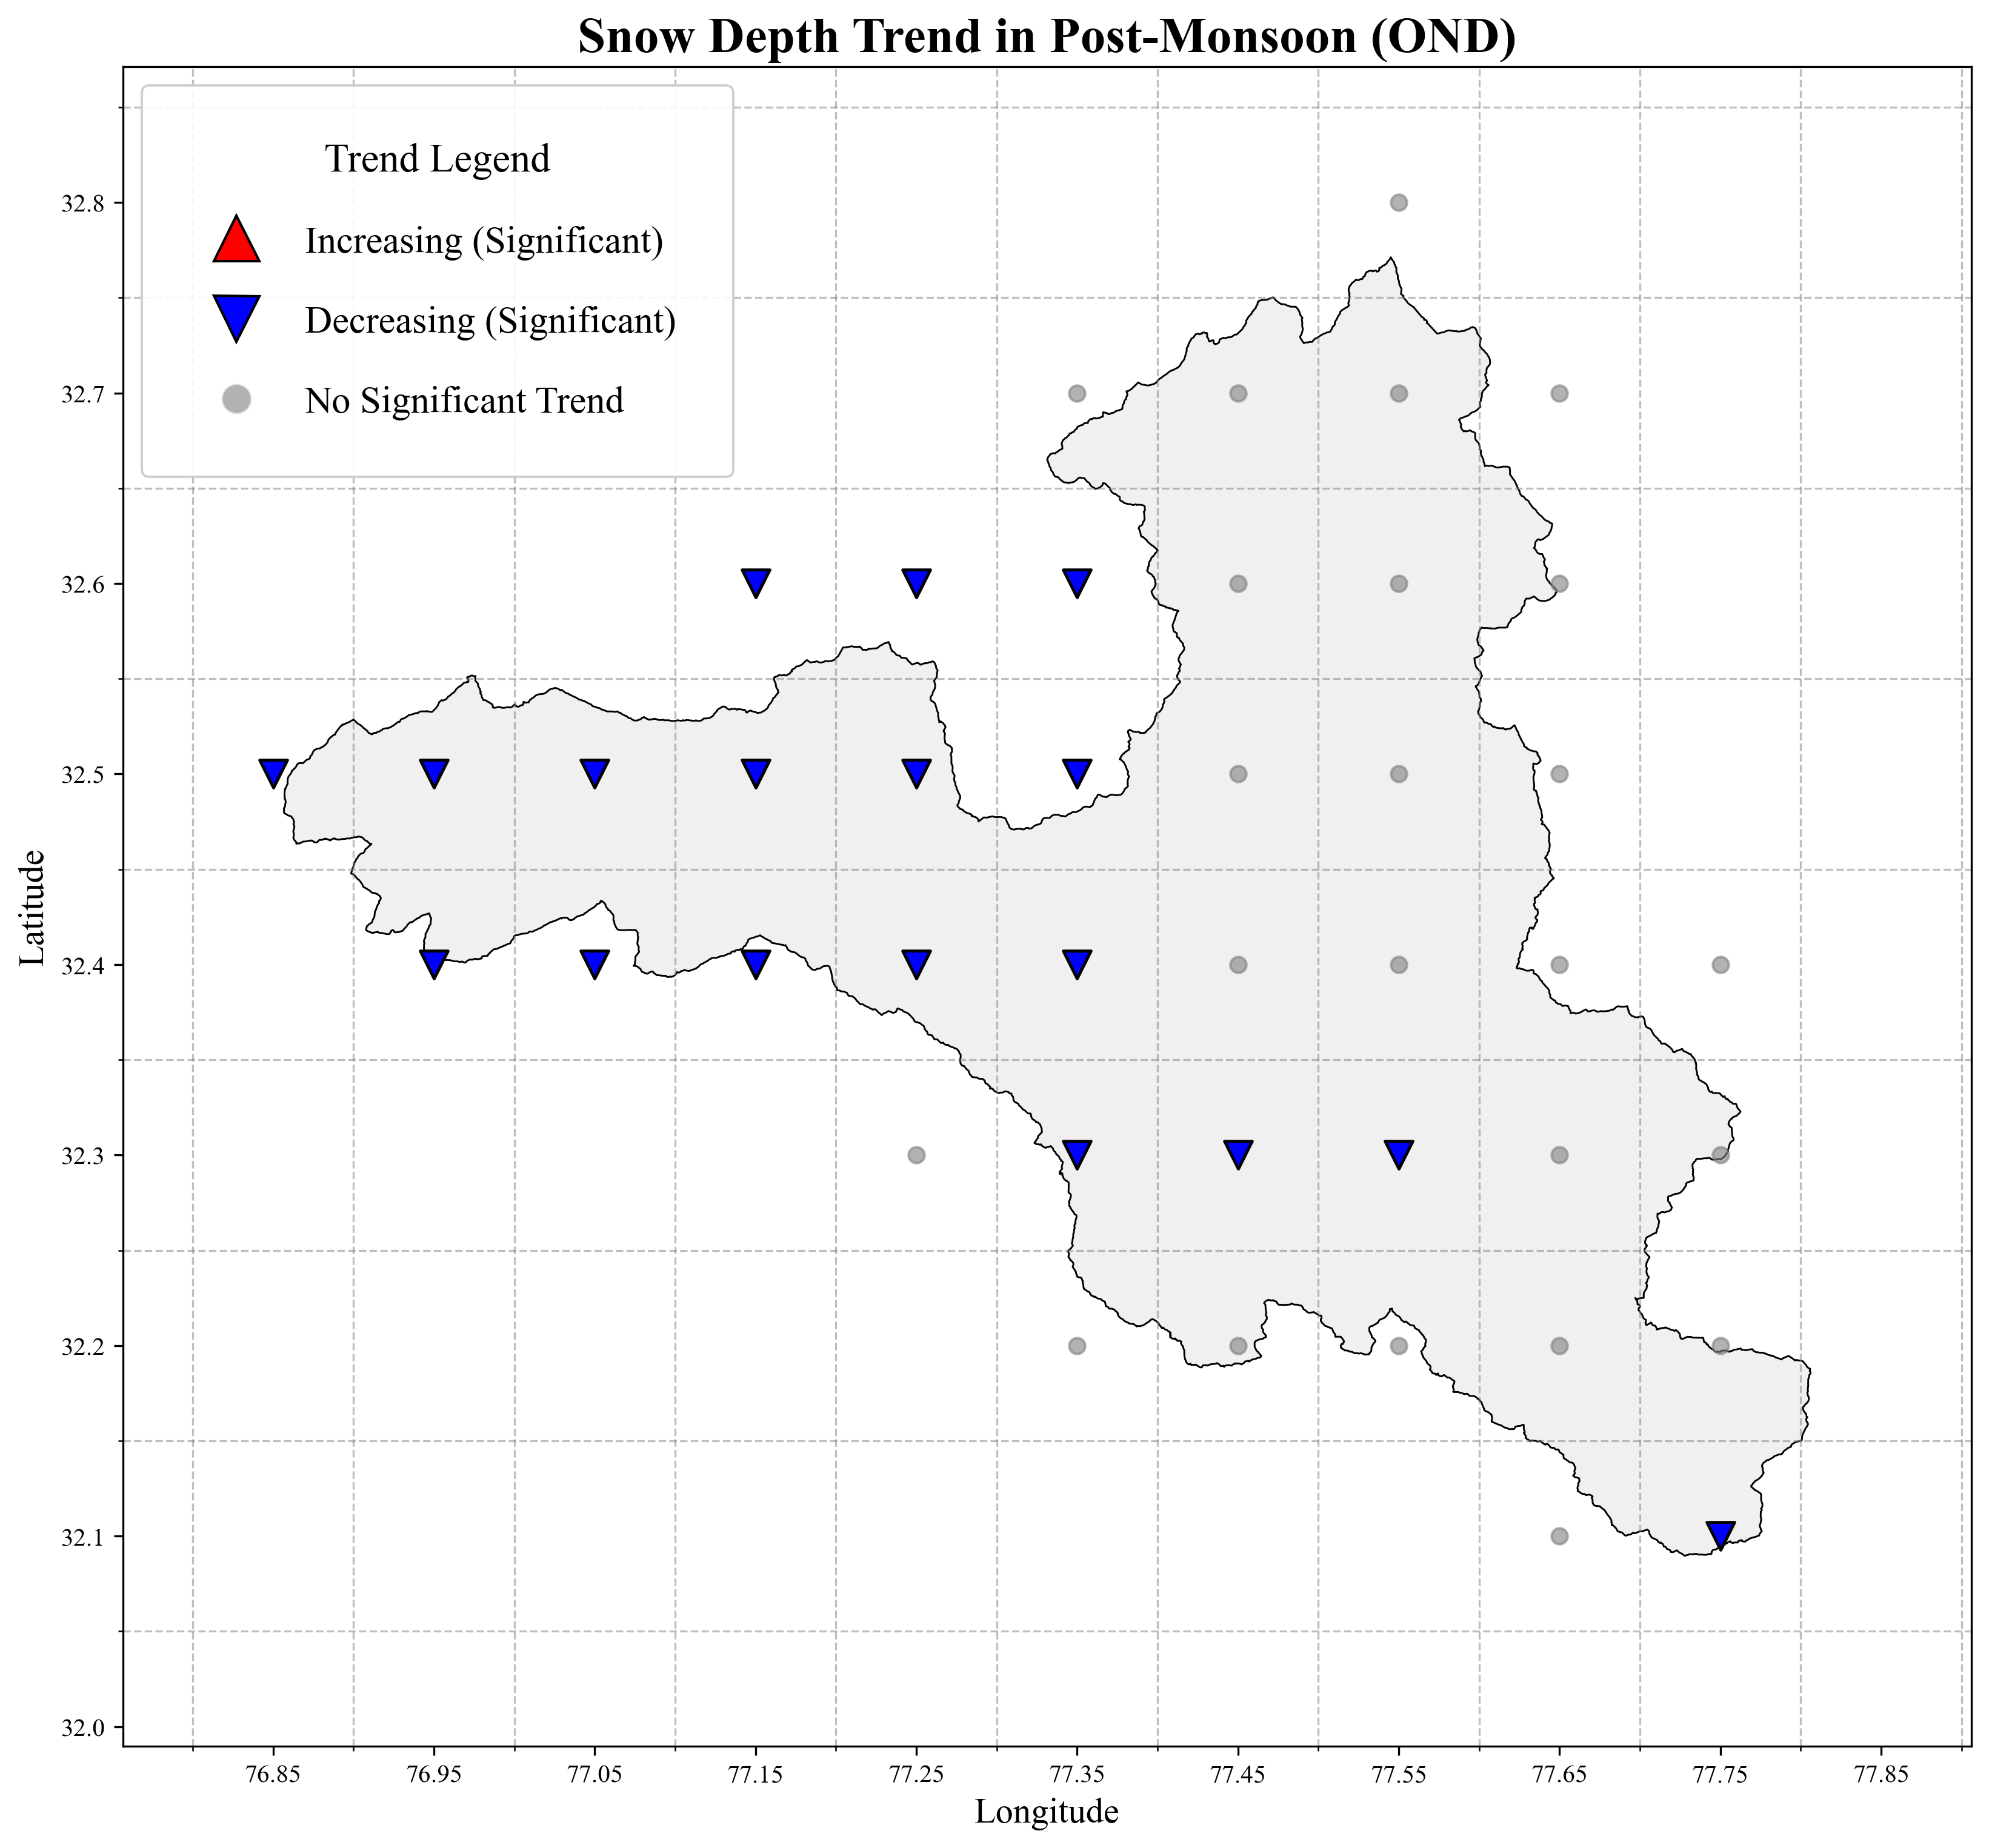


**Spatial Annual and Seasonal M-K Trend Maps of Snow Depth**

**Table S1** Trend Analysis results of monthly, seasonal and annual temperatures

| Mann-Kendall and Sen’s Slope Estimator Test Results for Temperature (1950 - 2024) | | | | | | |
| --- | --- | --- | --- | --- | --- | --- |
| Variable | **Trend** | **Sens Slope** | **P-Value** | **Significant** | **Kendall Tau** | **Z Score** |
| Jan | no trend | 0.011799 | 0.107365 | FALSE | 0.127207 | 1.610151 |
| Feb | increasing | 0.013454 | 0.045119 | TRUE | 0.158198 | 2.00354 |
| Mar | no trend | 0.005351 | 0.28035 | FALSE | 0.085405 | 1.079533 |
| Apr | no trend | 0.004123 | 0.475481 | FALSE | 0.056577 | 0.71359 |
| May | increasing | 0.015825 | 0.037827 | TRUE | 0.163964 | 2.076729 |
| Jun | increasing | 0.028908 | 0.001649 | TRUE | 0.248288 | 3.147113 |
| Jul | increasing | 0.040224 | 1.18E-05 | TRUE | 0.345586 | 4.382172 |
| Aug | increasing | 0.01251 | 0.014214 | TRUE | 0.193514 | 2.451821 |
| Sep | no trend | 0.00436 | 0.608427 | FALSE | 0.040721 | 0.512321 |
| Oct | no trend | 0.009802 | 0.453144 | FALSE | 0.059459 | 0.750184 |
| Nov | increasing | 0.032455 | 0.008884 | TRUE | 0.206486 | 2.616495 |
| Dec | no trend | 0.000571 | 0.948938 | FALSE | 0.005405 | 0.06404 |
| Winter | increasing | 0.010892 | 0.022727 | TRUE | 0.17982 | 2.277998 |
| Pre-monsoon | increasing | 0.008066 | 0.033798 | TRUE | 0.167568 | 2.122472 |
| Monsoon | increasing | 0.020242 | 0.000602 | TRUE | 0.270631 | 3.430719 |
| Post-monsoon | no trend | 0.014858 | 0.065935 | FALSE | 0.145225 | 1.838866 |
| Annual Mean | increasing | 0.015467 | 0.000126 | TRUE | 0.302342 | 3.833257 |

**Table S2** Trend Analysis results of monthly, seasonal and annual total precipitation

| Mann-Kendall and Sen’s Slope Estimator Test Results for Total Precipitation (1950 - 2024) | | | | | | |
| --- | --- | --- | --- | --- | --- | --- |
| Variable | **Trend** | **Sens Slope** | **P-Value** | **Significant** | **Kendall Tau** | **Z Score** |
| Jan | no trend | -0.236715556 | 0.589358079 | FALSE | -0.042882883 | -0.53976649 |
| Feb | no trend | 0.455866971 | 0.436787353 | FALSE | 0.061621622 | 0.777629689 |
| Mar | no trend | -0.811700625 | 0.06729228 | FALSE | -0.144504505 | -1.829716916 |
| Apr | no trend | -0.438086969 | 0.260472137 | FALSE | -0.089009009 | -1.125275903 |
| May | decreasing | -0.470521556 | 0.035363232 | TRUE | -0.166126126 | -2.104174454 |
| Jun | increasing | 0.530386277 | 0.000121834 | TRUE | 0.303063063 | 3.842405524 |
| Jul | no trend | 0.082281421 | 0.790771468 | FALSE | 0.021261261 | 0.265308953 |
| Aug | no trend | 0.133351086 | 0.492622406 | FALSE | 0.054414414 | 0.686143844 |
| Sep | no trend | 0.002565368 | 0.992700587 | FALSE | 0.001081081 | 0.009148585 |
| Oct | decreasing | -0.259658658 | 0.007762295 | TRUE | -0.21009009 | -2.662238113 |
| Nov | no trend | -0.039029324 | 0.82620915 | FALSE | -0.017657658 | -0.21956603 |
| Dec | no trend | -0.533681773 | 0.070075902 | FALSE | -0.143063063 | -1.811419747 |
| Winter | no trend | 0.25067462 | 0.515983259 | FALSE | 0.051531532 | 0.649549505 |
| Pre-monsoon | decreasing | -0.620048396 | 0.015334765 | TRUE | -0.191351351 | -2.424374914 |
| Monsoon | no trend | 0.197236531 | 0.06729228 | FALSE | 0.144504505 | 1.829716916 |
| Post-monsoon | decreasing | -0.397135833 | 0.027467508 | TRUE | -0.174054054 | -2.204808884 |
| Annual Total Precipitation | no trend | -2.105827741 | 0.16714486 | FALSE | -0.109189189 | -1.381436272 |

**Table S3** Trend Analysis results of monthly, seasonal and annual rainfall

| Mann-Kendall and Sen’s Slope Estimator Test Results for Rainfall (1950 - 2024) | | | | | | |
| --- | --- | --- | --- | --- | --- | --- |
| Variable | **Trend** | **Sens Slope** | **P-Value** | **Significant** | **Kendall Tau** | **Z Score** |
| Jan | increasing | 0.000937903 | 0.003317295 | TRUE | 0.231711712 | 2.93669565 |
| Feb | increasing | 0.002199167 | 7.44E-07 | TRUE | 0.39027027 | 4.949384258 |
| Mar | increasing | 0.002920576 | 0.043193174 | TRUE | 0.15963964 | 2.021837192 |
| Apr | no trend | 0.009130304 | 0.070075902 | FALSE | 0.143063063 | 1.811419747 |
| May | increasing | 0.057019667 | 0.000113061 | TRUE | 0.304504505 | 3.860702693 |
| Jun | increasing | 0.265641344 | 1.04E-05 | TRUE | 0.347747748 | 4.409617768 |
| Jul | increasing | 0.431867189 | 0.017812954 | TRUE | 0.187027027 | 2.369483406 |
| Aug | no trend | 0.222245143 | 0.10736492 | FALSE | 0.127207207 | 1.610150886 |
| Sep | no trend | 0.057176354 | 0.453143933 | FALSE | 0.059459459 | 0.750183936 |
| Oct | no trend | -0.002871308 | 0.734988213 | FALSE | -0.027027027 | -0.338497629 |
| Nov | increasing | 0.004514792 | 0.004975504 | TRUE | 0.221621622 | 2.808615466 |
| Dec | no trend | 0.000583524 | 0.080571504 | FALSE | 0.138018018 | 1.747379655 |
| Winter | increasing | 0.001712656 | 1.64E-06 | TRUE | 0.378018018 | 4.79385832 |
| Pre-monsoon | increasing | 0.025803073 | 8.05E-05 | TRUE | 0.310990991 | 3.943039954 |
| Monsoon | increasing | 0.276550396 | 0.001548644 | TRUE | 0.24972973 | 3.165410265 |
| Post-monsoon | no trend | 0.000575073 | 0.862004484 | FALSE | 0.014054054 | 0.173823107 |
| Annual Rainfall | increasing | 1.156449732 | 0.002245903 | TRUE | 0.241081081 | 3.05562725 |

**Table S4** Trend Analysis results of monthly, seasonal and annual snowfall

| Mann-Kendall and Sen’s Slope Estimator Test Results for Snowfall (1950 - 2024) | | | | | | |
| --- | --- | --- | --- | --- | --- | --- |
| Variable | **Trend** | **Sens Slope** | **P-Value** | **Significant** | **Kendall Tau** | **Z Score** |
| Jan | no trend | -0.237059926 | 0.589358079 | FALSE | -0.042882883 | -0.53976649 |
| Feb | no trend | 0.455229797 | 0.436787353 | FALSE | 0.061621622 | 0.777629689 |
| Mar | no trend | -0.80983 | 0.06729228 | FALSE | -0.144504505 | -1.829716916 |
| Apr | no trend | -0.440204687 | 0.237933638 | FALSE | -0.093333333 | -1.180167411 |
| May | decreasing | -0.555567162 | 0.014578977 | TRUE | -0.192792793 | -2.442672083 |
| Jun | increasing | 0.208906525 | 0.027467508 | TRUE | 0.174054054 | 2.204808884 |
| Jul | decreasing | -0.358688174 | 0.0008401 | TRUE | -0.263423423 | -3.339233372 |
| Aug | no trend | -0.083804231 | 0.14577312 | FALSE | -0.114954955 | -1.454624948 |
| Sep | no trend | -0.049829452 | 0.680569363 | FALSE | -0.032792793 | -0.411686306 |
| Oct | decreasing | -0.24262149 | 0.011271792 | TRUE | -0.2 | -2.534157929 |
| Nov | no trend | -0.042472714 | 0.797827009 | FALSE | -0.020540541 | -0.256160368 |
| Dec | no trend | -0.535568318 | 0.070075902 | FALSE | -0.143063063 | -1.811419747 |
| Winter | no trend | 0.24934014 | 0.527875547 | FALSE | 0.05009009 | 0.631252336 |
| Pre-monsoon | decreasing | -0.651986333 | 0.011569521 | TRUE | -0.199279279 | -2.525009344 |
| Monsoon | no trend | -0.082887051 | 0.301234321 | FALSE | -0.081801802 | -1.033790058 |
| Post-monsoon | decreasing | -0.387537596 | 0.030142367 | TRUE | -0.171171171 | -2.168214546 |
| Annual Snowfall | decreasing | -2.955239484 | 0.041336945 | TRUE | -0.161081081 | -2.040134361 |

**Table S5** Trend Analysis results of monthly, seasonal and annual snow depth

| Mann-Kendall and Sen’s Slope Estimator Test Results for Snow depth (1950 - 2024) | | | | | | |
| --- | --- | --- | --- | --- | --- | --- |
| Variable | **Trend** | **Sens Slope** | **P-Value** | **Significant** | **Kendall Tau** | **Z Score** |
| Jan | no trend | -0.003162956 | 0.148324127 | FALSE | -0.114234234 | -1.445476364 |
| Feb | no trend | -0.001992636 | 0.360265941 | FALSE | -0.072432432 | -0.914858458 |
| Mar | no trend | -0.002692746 | 0.156181828 | FALSE | -0.112072072 | -1.41803061 |
| Apr | decreasing | -0.004806488 | 0.008418877 | TRUE | -0.207927928 | -2.634792359 |
| May | decreasing | -0.005504798 | 0.003840759 | TRUE | -0.228108108 | -2.890952727 |
| Jun | decreasing | -0.005139162 | 0.042256437 | TRUE | -0.16036036 | -2.030985777 |
| Jul | decreasing | -0.00404896 | 0.024999968 | TRUE | -0.176936937 | -2.241403222 |
| Aug | decreasing | -0.000961225 | 0.003840759 | TRUE | -0.228108108 | -2.890952727 |
| Sep | no trend | -9.71E-05 | 0.22023242 | FALSE | -0.096936937 | -1.225910334 |
| Oct | decreasing | -0.00081343 | 0.004699915 | TRUE | -0.223063063 | -2.826912635 |
| Nov | decreasing | -0.00195874 | 0.033038081 | TRUE | -0.168288288 | -2.131620207 |
| Dec | decreasing | -0.00289695 | 0.044147399 | TRUE | -0.158918919 | -2.012688608 |
| Winter | no trend | -0.002385298 | 0.197067871 | FALSE | -0.101981982 | -1.289950426 |
| Pre-monsoon | decreasing | -0.004496381 | 0.017812954 | TRUE | -0.187027027 | -2.369483406 |
| Monsoon | decreasing | -0.002870029 | 0.033038081 | TRUE | -0.168288288 | -2.131620207 |
| Post-monsoon | decreasing | -0.001911543 | 0.024999968 | TRUE | -0.176936937 | -2.241403222 |
| Annual Mean | decreasing | -0.003449461 | 0.006585081 | TRUE | -0.214414414 | -2.71712962 |
